# Supplementary material
Source: publisher figshare collection journal article supplement (https://wellcome.figshare.com/ndownloader/files/21004215)
Supplement: Supplementary file 1 [file 21004215]

## Sheet: Wellcome_Research Culture_Datas
	Employment information										Working environment																																					Careers
ID	Q1 (multi)	Q2 (multi)	Q3 (single)	Q4 (multi)	Q5 (single)	Q6 (single)	Q7 (single)	Q8 (single)	Q9 (single)	Q10 (single)	Q11 (single)	Q12 (single)	Q13 (multi)	Q14 (grid)	Q14 (grid)	Q14 (grid)	Q14 (grid)	Q14 (grid)	Q15 (grid)	Q15 (grid)	Q15 (grid)	Q16 (grid)	Q16 (grid)	Q16 (grid)	Q16 (grid)	Q17 (grid)	Q17 (grid)	Q17 (grid)	Q17 (grid)	Q18 (grid)	Q18 (grid)	Q18 (grid)	Q18 (grid)	Q19 (grid)	Q19 (grid)	Q19 (grid)	Q19 (grid)	Q19 (grid)	Q19 (grid)	Q19 (grid)	Q19 (grid)	Q19 (grid)	Q19 (grid)	Q19 (grid)	Q19 (grid)	Q19 (grid)	Q19 (grid)	Q20 (single)	Q21 (grid)
	Which of the following best describes your current position within the research community?	Why did you leave the research community?	When did you leave the research community?	Which of the following best describes your research discipline or sector?	Which of the following best describes your current role?	Which of the following best describes your current role?	Do you supervise or manage others?	Which of the following best describes your current employment status?	What is the total length of your current contract, overall?	Which of the following degrees are you currently working towards?	Which of the following best describes the research space you work in or support?	On average, how many hours a week do you work?	Has your supervisor, PI or manager done any of the following within the last 12 months?	To what extent do you agree or disagree with the following statements regarding the management of your work?	To what extent do you agree or disagree with the following statements regarding the management of your work?	To what extent do you agree or disagree with the following statements regarding the management of your work?	To what extent do you agree or disagree with the following statements regarding the management of your work?	To what extent do you agree or disagree with the following statements regarding the management of your work?	To what extent do you agree or disagree with the following statements regarding your institutional senior management?	To what extent do you agree or disagree with the following statements regarding your institutional senior management?	To what extent do you agree or disagree with the following statements regarding your institutional senior management?	How important do you think the following research leadership characteristics are?	How important do you think the following research leadership characteristics are?	How important do you think the following research leadership characteristics are?	How important do you think the following research leadership characteristics are?	How successful is your workplace team in demonstrating each leadership characteristic?	How successful is your workplace team in demonstrating each leadership characteristic?	How successful is your workplace team in demonstrating each leadership characteristic?	How successful is your workplace team in demonstrating each leadership characteristic?	How successful is your institution / workplace as a whole in demonstrating each leadership characteristic?	How successful is your institution / workplace as a whole in demonstrating each leadership characteristic?	How successful is your institution / workplace as a whole in demonstrating each leadership characteristic?	How successful is your institution / workplace as a whole in demonstrating each leadership characteristic?	How far do you agree or disagree with the following statements relating to your current working environment?	How far do you agree or disagree with the following statements relating to your current working environment?	How far do you agree or disagree with the following statements relating to your current working environment?	How far do you agree or disagree with the following statements relating to your current working environment?	How far do you agree or disagree with the following statements relating to your current working environment?	How far do you agree or disagree with the following statements relating to your current working environment?	How far do you agree or disagree with the following statements relating to your current working environment?	How far do you agree or disagree with the following statements relating to your current working environment?	How far do you agree or disagree with the following statements relating to your current working environment?	How far do you agree or disagree with the following statements relating to your current working environment?	How far do you agree or disagree with the following statements relating to your current working environment?	How far do you agree or disagree with the following statements relating to your current working environment?	How far do you agree or disagree with the following statements relating to your current working environment?	How far do you agree or disagree with the following statements relating to your current working environment?	How many years have you been working within the research community?	How far do you agree or disagree with the following statements relating to your career over the last 1-5 years?
														My supervisor regularly reviews my work	I would feel comfortable approaching my supervisor if I couldn't reproduce lab results	My supervisor values negative results that don't meet an expected hypothesis	I have felt pressured by my supervisor to produce a particular result	My supervisor gives me freedom to explore my results	I think senior management makes wise decisions	I am satisfied with the way my institution/workplace handles performance reviews	Leaders communicate clear expectations regarding behaviours and/or culture in my working environment	Setting the direction for research and creating the plans and systems to achieve it	Leading and supporting teams of diverse individuals	Setting and upholding standards in the conduct of research and its application	Creating development and career opportunities	Setting the direction for research and creating the plans and systems to achieve it	Leading and supporting teams of diverse individuals	Setting and upholding standards in the conduct of research and its application	Creating development and career opportunities	Setting the direction for research and creating the plans and systems to achieve it	Leading and supporting teams of diverse individuals	Setting and upholding standards in the conduct of research and its application	Creating development and career opportunities	My working environment promotes a good work-life balance	My working environment promotes a collaborative culture	Creativity is welcomed within my working environment in all its forms	Healthy competition is encouraged within my working environment	Unhealthy competition is present within my working environment	My institution/workplace values speed of results over quality	My institution/workplace could do more to ensure research practices do not cut corners	Rigour of results is considered an important research outcome by my institution/workplace	My institution/workplace places more value on meeting metrics, than it does on research quality	I am confident that my institution/workplace would listen and take action if I raised a concern	The culture around research in my working environment supports my ability to do good quality research	My institution/workplace's expectations of me to undertake a number of roles leaves me little time for research	My working environment hinders researchers getting on with their research	My institution/workplace provides me with support to navigate the grant application process		The work I do is fairly and adequately recognised
2	I am employed / contracted / freelance	NULL	NULL	Life Sciences	Not-for-profit research institute (including charity funded, research council funded etc)	Research Support Staff	No	Full-time permanent	NULL	NULL	Mostly wet lab – based on experimental equipment and reagents	41-5 hours	Discussed your performance;Supported you with personal issues;Supported your wellbeing;Conducted a formal appraisal						5	2	6	Extremely important	Extremely important	Extremely important	Extremely important	Somewhat successful	Neutral	Extremely successful	Somewhat successful	Somewhat successful	Somewhat successful	Extremely successful	Somewhat successful	5	7	7	5	1	2	2	7	1	7	7	2	2	7	21-3 years	4
3	I am a student;I am employed / contracted / freelance	NULL	NULL	Life Sciences	Not-for-profit research institute (including charity funded, research council funded etc)	Research Assistant	No	Full-time fixed term / contract	1-2 years	Doctoral degree (PhD/DPhil/MD)	In the field	More than 8 hours	Discussed your performance;Conducted a formal appraisal	1		4	7	1	3	1	5	Extremely important	Extremely important	Extremely important	Extremely important	Extemely unsuccesful	Somewhat unsuccesful	Extemely unsuccesful	Somewhat unsuccesful	Neutral	Neutral	Somewhat successful	Somewhat successful	4	5	3	3	5	7	7	4	6	2	5	5	3	2	6-1 years	5
4	I am employed / contracted / freelance	NULL	NULL	Other	Academia / university	Research Support Staff	Yes, I manage multiple people	Full-time permanent	NULL	NULL	Not applicable	31-4 hours	None of the above						3	3	3	Extremely important	Extremely important	I don't know	Somewhat important	N/A	N/A	N/A	N/A	Neutral	Somewhat successful	Somewhat successful	Somewhat successful	4	4	5	3	5	4	5	4	4	4	4	4	4	4	11-2 years	8
5	I am employed / contracted / freelance	NULL	NULL	Life Sciences	Other	Head of Department	Yes, I manage multiple people	Full-time permanent	NULL	NULL	Other - a mixture of above	61-7 hours	Discussed your performance;Connected you to others within or outside your field;Conducted a formal appraisal						3	2	2	Extremely important	Extremely important	Extremely important	Extremely important	Somewhat successful	Somewhat successful	Somewhat successful	Neutral	Neutral	Neutral	Somewhat successful	Neutral	6	6	5	3	5	5	5	5	3	3	8	8	8	8	21-3 years	3
6	I am employed / contracted / freelance	NULL	NULL	Life Sciences	Academia / university	Lecturer / Assistant Professor	Yes, I manage multiple people	Full-time fixed term / contract	5+ years	NULL	Mostly wet lab – based on experimental equipment and reagents	51-6 hours	Connected you to others within or outside your field;Supported you with personal issues;Supported your wellbeing;Provided expert advice						4	5	3	Extremely important	Extremely important	Extremely important	Extremely important	Somewhat successful	Neutral	Extremely successful	Somewhat successful	Somewhat successful	Neutral	Extremely successful	Somewhat successful	5	3	5	5	6	3	3	5	6	5	4	2	5	5	11-2 years	4
7	I used to be part of the research community, but no longer am	My contract ended / my role was terminated;Too difficult to find a job / insecure career path;Too difficult to obtain funding	1-2 years ago	Life Sciences	NULL	NULL	NULL	NULL	NULL	NULL	NULL	NULL	NULL									Extremely important	Somewhat important	Extremely important	Somewhat important	NULL	NULL	NULL	NULL	NULL	NULL	NULL	NULL	3	7	6	7	7	6	6	7	3	3	4	2	2	6	NULL	4
8	I used to be part of the research community, but no longer am	I wanted to apply my skills elsewhere;Too difficult to find a job / insecure career path;For career progression / development	5+ years ago	NULL	NULL	NULL	NULL	NULL	NULL	NULL	NULL	NULL	NULL									NULL	NULL	NULL	NULL	NULL	NULL	NULL	NULL	NULL	NULL	NULL	NULL															NULL
10	I am employed / contracted / freelance	NULL	NULL	Life Sciences;Physical Sciences	Academia / university	Professor	Yes, I manage multiple people	Full-time permanent	NULL	NULL	Mostly computational	31-4 hours	Had a conversation with you about your career aspirations;Discussed your performance;Conducted a formal appraisal						4	4	4	Extremely important	Extremely important	Extremely important	Extremely important	Somewhat unsuccesful	Somewhat unsuccesful	Neutral	Somewhat unsuccesful	Somewhat unsuccesful	Somewhat unsuccesful	Neutral	Somewhat unsuccesful	5	4	6	4	6	6	6	4	6	3	4	4	5	4	11-2 years	6
11	I am a student;I am employed / contracted / freelance	NULL	NULL	Humanities / Social Sciences	Academia / university	Research Assistant	No	Full-time fixed term / contract	Less than 1 year	Doctoral degree (PhD/DPhil/MD)	Mostly human participants	71-8 hours	Noted your achievements;Offered you training to support your skill development;Provided an example of appropriate research standards;Conducted a formal appraisal	7	1	1	7	1	4	4	4	Somewhat important	Extremely important	Extremely important	Extremely important	Somewhat successful	Extemely unsuccesful	Somewhat unsuccesful	Somewhat successful	Neutral	Neutral	Neutral	Somewhat successful	1	1	1	1	7	7	7	1	7	1	1	8	7	4	1-2 years	1
12	I used to be part of the research community, but no longer am	My contract ended / my role was terminated;Too difficult to find a job / insecure career path;Too difficult to obtain funding;Other	5+ years ago	NULL	NULL	NULL	NULL	NULL	NULL	NULL	NULL	NULL	NULL									NULL	NULL	NULL	NULL	NULL	NULL	NULL	NULL	NULL	NULL	NULL	NULL															NULL
13	I am employed / contracted / freelance	NULL	NULL	Life Sciences	Academia / university	Postdoc / Research Associate	No	Full-time fixed term / contract	3-5 years	NULL	Mostly wet lab – based on experimental equipment and reagents	31-4 hours	Discussed your performance;Provided an example of appropriate ethical codes;Conducted a formal appraisal	4	6	4	4	3	2	2	2	Somewhat unimportant	Extremely important	Somewhat important	Extremely important	Somewhat unsuccesful	Neutral	Somewhat unsuccesful	Somewhat unsuccesful	Somewhat unsuccesful	Neutral	Somewhat unsuccesful	Somewhat unsuccesful	2	3	2	2	6	5	7	4	6	2	4	8	4	6	21-3 years	4
14	I am employed / contracted / freelance	NULL	NULL	Life Sciences	Academia / university	Professor	Yes, I manage multiple people	Part-time fixed term / contract	5+ years	NULL	Mostly computational	31-4 hours	Noted your achievements						4	3	3	Extremely important	Extremely important	Extremely important	Extremely important	Somewhat unsuccesful	Extemely unsuccesful	Somewhat unsuccesful	Somewhat unsuccesful	Neutral	Neutral	Somewhat unsuccesful	Somewhat unsuccesful	3	5	6	4	2	2	4	6	5	5	5	5	2	6	3+ years	7
15	I am employed / contracted / freelance	NULL	NULL	Physical Sciences	Academia / university	Senior Lecturer / Associate Professor	Yes, I manage multiple people	Full-time permanent	NULL	NULL	Mostly wet lab – based on experimental equipment and reagents	41-5 hours	Had a conversation with you about your career aspirations;Supported your wellbeing						3	6	3	Extremely important	Extremely important	Extremely important	Extremely important	Neutral	Somewhat unsuccesful	N/A	Somewhat successful	Somewhat unsuccesful	Somewhat unsuccesful	N/A	Neutral	2	1	1	4	6	7	4	3	6	3	1	7	7	5	11-2 years	3
16	I am employed / contracted / freelance	NULL	NULL	Life Sciences	Academia / university	Research Support Staff	Yes, I manage 1 person	Part-time permanent	NULL	NULL	Mostly wet lab – based on experimental equipment and reagents	31-4 hours	Had a conversation with you about your career aspirations;Provided career advice and guidance;Discussed your performance;Noted your achievements;Offered you training to support your skill development;Supported you with personal issues;Conducted a formal appraisal;Discussed alternative career options						6	6	5	Extremely important	Extremely important	Extremely important	Extremely important	Somewhat successful	Somewhat successful	Somewhat successful	Neutral	Somewhat successful	Somewhat successful	Somewhat successful	Neutral	5	7	5	4	2	2	4	7	3	7	7	5	5	6	21-3 years	6
17	I am retired	NULL	NULL	Life Sciences	NULL	NULL	NULL	NULL	NULL	NULL	NULL	NULL	NULL									Somewhat important	Somewhat important	Extremely important	Somewhat important	NULL	NULL	NULL	NULL	NULL	NULL	NULL	NULL															NULL
18	I am employed / contracted / freelance	NULL	NULL	Life Sciences	Academia / university	Professor	Yes, I manage multiple people	Full-time permanent	NULL	NULL	Mostly wet lab – based on experimental equipment and reagents	51-6 hours	Discussed your performance;Noted your achievements;Provided expert advice;Conducted a formal appraisal						3	4	4	Extremely important	Extremely important	Extremely important	Extremely important	Somewhat successful	Somewhat successful	Somewhat successful	Neutral	Neutral	Somewhat successful	Neutral	Neutral	4	5	5	5	5	5	6	4	5	3	4	3	3	3	11-2 years	6
19	I am retired	NULL	NULL	Life Sciences	NULL	NULL	NULL	NULL	NULL	NULL	NULL	NULL	NULL									Somewhat unimportant	Neutral	Extremely important	Neutral	NULL	NULL	NULL	NULL	NULL	NULL	NULL	NULL															NULL
20	I am employed / contracted / freelance	NULL	NULL	Life Sciences	Academia / university	Postdoc / Research Associate	Yes, I manage multiple people	Full-time fixed term / contract	1-2 years	NULL	Mostly wet lab – based on experimental equipment and reagents	71-8 hours	Had a conversation with you about your career aspirations;Provided career advice and guidance;Noted your achievements	2	2	2	7	6	2	3	2	Extremely important	Extremely important	Extremely important	Extremely important	Somewhat unsuccesful	Somewhat successful	Somewhat successful	Extremely successful	Neutral	Neutral	Somewhat unsuccesful	Neutral	2	4	5	4	4	6	6	3	6	4	3	6	6	7	6-1 years	4
21	I am employed / contracted / freelance	NULL	NULL	Life Sciences	Academia / university	Postdoc / Research Associate	No	Full-time fixed term / contract	3-5 years	NULL	Mostly computational	51-6 hours	Had a conversation with you about your career aspirations;Provided career advice and guidance;Noted your achievements;Offered you training to support your skill development;Connected you to others within or outside your field;Provided expert advice;Conducted a formal appraisal;Discussed alternative career options	5	7	7	2		2	4	6	Extremely important	Extremely important	Extremely important	Extremely important	Somewhat successful	N/A	Extremely successful	Neutral	Somewhat successful	Somewhat successful	Extremely successful	Somewhat unsuccesful	3	5	5	4	2	5	6	6	3	6	6	2	1	2	11-2 years	5
22	I am employed / contracted / freelance	NULL	NULL	Other	Not-for-profit research institute (including charity funded, research council funded etc)	Research Support Staff	Yes, I manage 1 person	Full-time permanent	NULL	NULL	Mostly computational	41-5 hours	Had a conversation with you about your career aspirations;Provided career advice and guidance;Discussed your performance;Noted your achievements;Offered you training to support your skill development;Supported you with personal issues;Supported your wellbeing;Provided expert advice;Conducted a formal appraisal;Discussed alternative career options						5	3	3	Extremely important	Extremely important	Extremely important	Somewhat important	Extremely successful	Extremely successful	Somewhat successful	Somewhat successful	Neutral	Neutral	Somewhat successful	Neutral	2	3	3	4	6	7	6	6	6	2	8	6	4	4	11-2 years	3
25	I am employed / contracted / freelance	NULL	NULL	Humanities / Social Sciences	Academia / university	Professor	Yes, I manage multiple people	Full-time permanent	NULL	NULL	Mostly human participants	61-7 hours	Noted your achievements;Conducted a formal appraisal						4	5	5	Somewhat important	Extremely important	Extremely important	Somewhat important	Somewhat successful	Extremely successful	Somewhat successful	Somewhat successful	Neutral	Somewhat successful	Somewhat successful	Somewhat unsuccesful	5	6	6	5	4	3	5	6	4	5	6	5	3	6	11-2 years	6
26	I am a student	NULL	NULL	Life Sciences;Humanities / Social Sciences	NULL	NULL	NULL	NULL	NULL	Doctoral degree (PhD/DPhil/MD)	NULL	31-4 hours	None of the above	1	2	1	7	4	4	5	5	Extremely important	Extremely important	Extremely important	Extremely important	Somewhat successful	Neutral	Somewhat successful	Somewhat successful	Extremely successful	Extremely successful	Extremely successful	Extremely successful	7	6	5	4	3	3	7	6	5	4	5	2	2	2	NULL	6
27	I am employed / contracted / freelance	NULL	NULL	Life Sciences	Academia / university	Professor	Yes, I manage multiple people	Full-time permanent	NULL	NULL	Mostly wet lab – based on experimental equipment and reagents	51-6 hours	Provided career advice and guidance;Noted your achievements;Connected you to others within or outside your field;Provided expert advice						4	6	6	Extremely important	Extremely important	Extremely important	Extremely important	Somewhat successful	Extremely successful	Extremely successful	Neutral	Neutral	Somewhat successful	Somewhat successful	Somewhat successful	6	7	6	6	3	2	3	7	3	5	6	3	2	6	21-3 years	6
28	I am employed / contracted / freelance	NULL	NULL	Life Sciences	Academia / university	Group Leader	Yes, I manage multiple people	Full-time fixed term / contract	3-5 years	NULL	Mostly wet lab – based on experimental equipment and reagents	41-5 hours	Had a conversation with you about your career aspirations;Provided career advice and guidance;Discussed your performance;Noted your achievements;Provided expert advice;Conducted a formal appraisal						6	6	5	Extremely important	Extremely important	Extremely important	Extremely important	Somewhat successful	Extremely successful	Extremely successful	Somewhat successful	Somewhat successful	Extremely successful	Somewhat successful	Somewhat unsuccesful	4	5	5	5	4	3	2	3	4	2	4	4	4	6	6-1 years	5
29	I am employed / contracted / freelance	NULL	NULL	Life Sciences	Academia / university	Training Fellow	Yes, I manage 1 person	Full-time fixed term / contract	3-5 years	NULL	Mostly wet lab – based on experimental equipment and reagents	51-6 hours	Had a conversation with you about your career aspirations;Discussed your performance;Noted your achievements;Connected you to others within or outside your field;Provided expert advice;Conducted a formal appraisal	4	7	5	3	7	3	3	4	Extremely important	Somewhat important	Extremely important	Extremely important	Somewhat successful	Neutral	Extremely successful	Neutral	Somewhat successful	Neutral	Somewhat successful	Somewhat unsuccesful	5	5	6	5	6	7	6	6	6	4	4	3	3	4	11-2 years	5
30	I am employed / contracted / freelance	NULL	NULL	Life Sciences	Not-for-profit research institute (including charity funded, research council funded etc)	Director	Yes, I manage multiple people	Full-time permanent	NULL	NULL	Other - a mixture of above	41-5 hours	Provided career advice and guidance;Discussed your performance;Noted your achievements;Offered you training to support your skill development;Connected you to others within or outside your field;Supported you with personal issues;Supported your wellbeing;Conducted a formal appraisal						3	6	4	Extremely important	Extremely important	Extremely important	Somewhat important	Somewhat successful	Somewhat successful	Somewhat successful	Neutral	Somewhat successful	Somewhat successful	Somewhat successful	Neutral	6	7	5	4	5	4	5	6	2	3	4	8	4	8	11-2 years	5
31	I am employed / contracted / freelance	NULL	NULL	Life Sciences	Academia / university	Professor	Yes, I manage multiple people	Full-time permanent	NULL	NULL	Mostly wet lab – based on experimental equipment and reagents	51-6 hours	Discussed your performance;Noted your achievements;Conducted a formal appraisal						6	4	3	Extremely important	Extremely important	Extremely important	Extremely important	Somewhat successful	Somewhat successful	Somewhat successful	Somewhat successful	Somewhat successful	Somewhat successful	Somewhat successful	Somewhat successful	4	6	5	5	2	2	2	6	3	5	6	4	2	6	21-3 years	6
32	I am looking for work / unemployed	NULL	NULL	Humanities / Social Sciences	NULL	NULL	NULL	NULL	NULL	NULL	NULL	NULL	NULL									Somewhat important	Extremely important	Extremely important	Extremely important	NULL	NULL	NULL	NULL	NULL	NULL	NULL	NULL															21-3 years
33	I am employed / contracted / freelance	NULL	NULL	Life Sciences	Academia / university	Professor	Yes, I manage multiple people	Full-time permanent	NULL	NULL	Mostly wet lab – based on experimental equipment and reagents	51-6 hours	Supported you with personal issues;Conducted a formal appraisal						4	4	5	Extremely important	Extremely important	Extremely important	Extremely important	Neutral	Somewhat successful	Somewhat successful	Somewhat successful	Neutral	Somewhat successful	Somewhat successful	Somewhat successful	4	5	5	5	4	4	4	5	6	4	4	6	5	4	21-3 years	4
34	I am employed / contracted / freelance	NULL	NULL	Life Sciences	Academia / university	Professor	Yes, I manage multiple people	Full-time permanent	NULL	NULL	Mostly human participants	41-5 hours	Had a conversation with you about your career aspirations;Discussed your performance;Provided expert advice;Conducted a formal appraisal						6	6	5	Extremely important	Extremely important	Extremely important	Extremely important	Extremely successful	Extremely successful	Somewhat successful	Extremely successful	Extremely successful	Extremely successful	Somewhat successful	Extremely successful	6	6	6	2	2	2	6	6	2	7	6	2	2	6	11-2 years	5
35	I am employed / contracted / freelance	NULL	NULL	Life Sciences	Academia / university	Professor	Yes, I manage multiple people	Full-time permanent	NULL	NULL	Mostly wet lab – based on experimental equipment and reagents	31-4 hours	Not applicable						3	6	3	Somewhat important	Neutral	Extremely important	Extremely important	N/A	N/A	N/A	N/A	Extemely unsuccesful	Somewhat unsuccesful	Extremely successful	Neutral	3	4	4	2	4	4	4	5	7	7	5	4	3	5	3+ years	6
36	I am employed / contracted / freelance	NULL	NULL	Life Sciences	Academia / university	Senior Lecturer / Associate Professor	Yes, I manage multiple people	Full-time fixed term / contract	3-5 years	NULL	Mostly human participants	31-4 hours	Discussed your performance;Noted your achievements;Offered you training to support your skill development;Connected you to others within or outside your field;Supported your wellbeing;Provided expert advice						6	6	5	Extremely important	Extremely important	Extremely important	Extremely important	Somewhat successful	Neutral	Somewhat successful	Extremely successful	Somewhat successful	Somewhat successful	Extremely successful	Extremely successful	5	6	6	4	4	2	3	7	5	6	6	5	3	4	11-2 years	6
37	I am employed / contracted / freelance	NULL	NULL	Other	Not-for-profit research institute (including charity funded, research council funded etc)	Other - Researcher	Yes, I manage multiple people	Full-time permanent	NULL	NULL	Other - a mixture of above	51-6 hours	Had a conversation with you about your career aspirations;Provided career advice and guidance;Discussed your performance;Noted your achievements;Connected you to others within or outside your field;Supported your wellbeing;Provided expert advice;Conducted a formal appraisal						2	5	3	Extremely important	Extremely important	Extremely important	Extremely important	Somewhat successful	Somewhat successful	Somewhat successful	Neutral	Somewhat successful	Somewhat successful	Somewhat successful	Somewhat unsuccesful	1	6	1	3	7	7	7	7	7	1	7	7	7	1	21-3 years	3
38	I am a student	NULL	NULL	Life Sciences;Physical Sciences	NULL	NULL	NULL	NULL	NULL	Doctoral degree (PhD/DPhil/MD)	NULL	71-8 hours	None of the above	2	4	4	6	6	4	3	3	Extremely important	Extremely important	Extremely important	Extremely important	Neutral	Somewhat unsuccesful	Neutral	Somewhat unsuccesful	Neutral	Somewhat unsuccesful	Neutral	Extemely unsuccesful	3	6	5	5	5	5	6	6	3	5	4	3	3	4	NULL	4
39	I am employed / contracted / freelance	NULL	NULL	Life Sciences	Academia / university	Professor	Yes, I manage multiple people	Full-time permanent	NULL	NULL	Mostly computational	41-5 hours	Had a conversation with you about your career aspirations;Discussed your performance						4	5	5	Neutral	Somewhat important	Somewhat important	Extremely important	Somewhat successful	Somewhat successful	Somewhat successful	Somewhat successful	Neutral	Somewhat successful	Somewhat successful	Somewhat successful	3	5	5	4	4	3	4	5	3	5	6	5	5	5	3+ years	5
40	I am employed / contracted / freelance	NULL	NULL	Other	Academia / university	Independent Fellow	Yes, I manage multiple people	Part-time fixed term / contract	5+ years	NULL	Other - a mixture of above	31-4 hours	Discussed your performance;Provided an example of appropriate ethical codes;Provided an example of appropriate research standards						4	3	4	Extremely important	Extremely important	Extremely important	Extremely important	Somewhat successful	Somewhat successful	Somewhat successful	Somewhat successful	Somewhat unsuccesful	Somewhat successful	Somewhat successful	Somewhat successful	4	4	4	5	5	4	4	5	4	3	3	6	5	4	6-1 years	3
41	I am a student	NULL	NULL	Life Sciences;Physical Sciences	NULL	NULL	NULL	NULL	NULL	Doctoral degree (PhD/DPhil/MD)	NULL	41-5 hours	Had a conversation with you about your career aspirations;Provided career advice and guidance;Discussed your performance;Offered you training to support your skill development;Provided an example of appropriate research standards;Connected you to others within or outside your field;Supported you with personal issues;Supported your wellbeing;Provided expert advice;Discussed alternative career opti…	7	7	7	1	7	2	4	7	Extremely important	Extremely important	Extremely important	Extremely important	Somewhat successful	Extremely successful	Extremely successful	Extremely successful	Somewhat successful	Neutral	Somewhat successful	Extremely successful	5	6	7	5	2	1	6	5	2	5	4	2	3	8	NULL	6
42	I am employed / contracted / freelance	NULL	NULL	Life Sciences	Academia / university	Professor	Yes, I manage multiple people	Full-time permanent	NULL	NULL	Mostly wet lab – based on experimental equipment and reagents	71-8 hours	Noted your achievements;Supported you with personal issues;Conducted a formal appraisal						2	7	4	Somewhat important	Somewhat important	Somewhat important	Extremely important	N/A	Somewhat successful	Neutral	Somewhat successful	N/A	N/A	Neutral	Somewhat successful	4	7	7	5	1	1	4	7	3	5	5	4	5	5	3+ years	7
43	I am employed / contracted / freelance	NULL	NULL	Life Sciences	Academia / university	Professor	Yes, I manage multiple people	Full-time permanent	NULL	NULL	Mostly wet lab – based on experimental equipment and reagents	61-7 hours	Had a conversation with you about your career aspirations;Discussed your performance;Noted your achievements;Conducted a formal appraisal						6	4	4	Extremely important	Extremely important	Extremely important	Extremely important	Somewhat successful	Somewhat successful	Extremely successful	Somewhat successful	Somewhat successful	Somewhat successful	Somewhat successful	Somewhat successful	3	5	7	6	3	1	6	6	2	7	7	5	2	6	21-3 years	6
44	I am employed / contracted / freelance	NULL	NULL	Life Sciences	Academia / university	Lecturer / Assistant Professor	Yes, I manage multiple people	Full-time permanent	NULL	NULL	Mostly wet lab – based on experimental equipment and reagents	41-5 hours	Provided career advice and guidance;Discussed your performance;Provided expert advice;Conducted a formal appraisal;Requested your feedback on their management of you						2	3	3	Extremely important	Somewhat important	Extremely important	Extremely important	Somewhat successful	Neutral	Neutral	Neutral	Somewhat unsuccesful	Somewhat unsuccesful	Neutral	Neutral	3	2	3	4	4	6	4	4	4	5	3	7	7	3	11-2 years	3
45	I am employed / contracted / freelance	NULL	NULL	Life Sciences	Academia / university	Dean	Yes, I manage multiple people	Full-time permanent	NULL	NULL	Mostly wet lab – based on experimental equipment and reagents	41-5 hours	Had a conversation with you about your career aspirations						4	6	5	Extremely important	Extremely important	Extremely important	Extremely important	Extremely successful	Extremely successful	Extremely successful	Somewhat successful	Somewhat successful	Somewhat successful	Extremely successful	Somewhat successful	5	5	6	5	3	3	4	5	4	5	6	4	3	4	3+ years	6
46	I am a student	NULL	NULL	Life Sciences	NULL	NULL	NULL	NULL	NULL	Doctoral degree (PhD/DPhil/MD)	NULL	41-5 hours	Had a conversation with you about your career aspirations;Discussed your performance;Provided an example of appropriate ethical codes;Noted your achievements;Offered you training to support your skill development;Provided an example of appropriate research standards;Connected you to others within or outside your field;Supported you with personal issues;Supported your wellbeing;Provided expert adv…	5	6	4	2	5	4	5	4	Somewhat important	Somewhat important	Somewhat important	Somewhat important	Somewhat successful	Neutral	Neutral	Neutral	Somewhat successful	Neutral	Somewhat successful	Somewhat successful	5	5	6	5	1	4	5	5	5	3	5	2	3	8	NULL	5
47	I am a student	NULL	NULL	Life Sciences	NULL	NULL	NULL	NULL	NULL	Doctoral degree (PhD/DPhil/MD)	NULL	51-6 hours	Provided expert advice	2	1	1	7	1	1	1	1	Extremely important	Extremely important	Extremely important	Extremely important	Somewhat unsuccesful	Somewhat unsuccesful	Extemely unsuccesful	Extemely unsuccesful	I don't know	I don't know	I don't know	I don't know	1	1	1	1	7	7	7	4	7	1	3	2	4	4	NULL	2
48	I am employed / contracted / freelance	NULL	NULL	Life Sciences	Academia / university	Professor	Yes, I manage multiple people	Full-time permanent	NULL	NULL	Mostly wet lab – based on experimental equipment and reagents	51-6 hours	Had a conversation with you about your career aspirations;Provided career advice and guidance;Discussed your performance;Noted your achievements;Offered you training to support your skill development;Provided an example of appropriate research standards;Supported your wellbeing;Provided expert advice;Conducted a formal appraisal;Requested your feedback on their management of you						6	6	6	Extremely important	Extremely important	Extremely important	Extremely important	Neutral	Extremely successful	Somewhat successful	Extremely successful	Somewhat successful	Extremely successful	Somewhat successful	Extremely successful	3	5	6	5	5	3	5	6	5	6	7	6	5	5	21-3 years	6
49	I am employed / contracted / freelance	NULL	NULL	Life Sciences	Academia / university	Dean	Yes, I manage multiple people	Full-time permanent	NULL	NULL	Mostly wet lab – based on experimental equipment and reagents	41-5 hours	Noted your achievements;Offered you training to support your skill development;Conducted a formal appraisal						6	4	4	Extremely important	Extremely important	Extremely important	Somewhat important	Somewhat successful	Somewhat successful	Extremely successful	Neutral	Neutral	Somewhat successful	Somewhat successful	Somewhat successful	3	5	5	5	7	5	7	6	4	6	5	4	4	7	3+ years	5
50	I am employed / contracted / freelance	NULL	NULL	Life Sciences	Academia / university	Head of Department	Yes, I manage 1 person	Full-time permanent	NULL	NULL	Mostly wet lab – based on experimental equipment and reagents	61-7 hours	Had a conversation with you about your career aspirations;Discussed your performance;Noted your achievements;Connected you to others within or outside your field;Supported your wellbeing;Provided expert advice;Conducted a formal appraisal						5	6	5	Extremely important	Extremely important	Extremely important	Extremely important	Somewhat successful	Somewhat successful	Somewhat successful	Somewhat successful	Somewhat successful	Somewhat successful	Somewhat successful	Somewhat successful	5	6	6	5	2	2	5	7	2	6	6	3	3	4	3+ years	7
51	I am employed / contracted / freelance	NULL	NULL	Humanities / Social Sciences	Academia / university	Lecturer / Assistant Professor	Yes, I manage multiple people	Full-time permanent	NULL	NULL	Mostly primary sources / artefacts	51-6 hours	Had a conversation with you about your career aspirations;Provided career advice and guidance;Discussed your performance;Noted your achievements;Offered you training to support your skill development;Connected you to others within or outside your field;Provided expert advice;Conducted a formal appraisal						5	3	6	Extremely important	Extremely important	Somewhat important	Somewhat important	Extremely successful	Extremely successful	Neutral	Neutral	Somewhat successful	Somewhat successful	Somewhat successful	Neutral	4	5	5	7	6	3	4	4	4	5	6	6	6	7	6-1 years	6
52	I am employed / contracted / freelance	NULL	NULL	Life Sciences;Physical Sciences	Academia / university	Professor	Yes, I manage multiple people	Full-time permanent	NULL	NULL	Mostly wet lab – based on experimental equipment and reagents	71-8 hours	Conducted a formal appraisal						5	5	5	Extremely important	Extremely important	Extremely important	Extremely important	Extremely successful	Somewhat successful	Extremely successful	Somewhat successful	Somewhat successful	Somewhat successful	Somewhat successful	Somewhat successful	1	4	3	3	5	4	4	5	6	6	5	5	5	5	3+ years	6
53	I am employed / contracted / freelance	NULL	NULL	Life Sciences	Academia / university	Professor	Yes, I manage 1 person	Full-time permanent	NULL	NULL	Mostly wet lab – based on experimental equipment and reagents	41-5 hours	Conducted a formal appraisal						5	3	2	Extremely important	Extremely important	Extremely important	Extremely important	Somewhat successful	Somewhat successful	Somewhat successful	Extremely successful	Somewhat successful	Neutral	Neutral	Somewhat successful	4	5	5	4	6	4	6	4	6	4	4	2	2	5	3+ years	3
54	I am employed / contracted / freelance	NULL	NULL	Humanities / Social Sciences	Academia / university	Senior Lecturer / Associate Professor	Yes, I manage multiple people	Full-time permanent	NULL	NULL	Mostly primary sources / artefacts	41-5 hours	Provided career advice and guidance;Discussed your performance;Noted your achievements;Supported you with personal issues;Provided expert advice;Conducted a formal appraisal						5	5	5	Extremely important	Extremely important	Extremely important	Extremely important	Extremely successful	Extremely successful	Extremely successful	Somewhat successful	Somewhat successful	Neutral	Somewhat successful	Neutral	5	6	5	4	4	3	8	6	3	5	5	5	3	4	11-2 years	2
55	I am employed / contracted / freelance	NULL	NULL	Humanities / Social Sciences	Academia / university	Professor	Yes, I manage multiple people	Full-time permanent	NULL	NULL	Mostly primary sources / artefacts	31-4 hours	None of the above						4	2	5	Extremely important	Extremely important	Extremely important	Somewhat important	Somewhat successful	Extremely successful	Extremely successful	Somewhat successful	Somewhat successful	Extremely successful	Extremely successful	Extremely successful	6	7	6	7	2	2	2	7	2	4	7	3	1	7	21-3 years	7
56	I am employed / contracted / freelance	NULL	NULL	Life Sciences	Academia / university	Professor	Yes, I manage multiple people	Full-time permanent	NULL	NULL	Mostly wet lab – based on experimental equipment and reagents	51-6 hours	Discussed your performance;Noted your achievements;Connected you to others within or outside your field;Conducted a formal appraisal						6	6	5	Somewhat important	Extremely important	Extremely important	Extremely important	Somewhat successful	Extremely successful	Somewhat successful	Extremely successful	Somewhat successful	Extremely successful	Somewhat successful	Somewhat successful	5	4	5	4	5	2	3	6	3	6	6	2	2	5	11-2 years	5
57	I am a student	NULL	NULL	Life Sciences	NULL	NULL	NULL	NULL	NULL	Doctoral degree (PhD/DPhil/MD)	NULL	51-6 hours	Discussed your performance;Noted your achievements;Offered you training to support your skill development;Provided an example of appropriate research standards;Provided expert advice	6	6		4	5	4	4	2	Somewhat important	Somewhat important	Extremely important	Neutral	Somewhat successful	Neutral	Neutral	Somewhat unsuccesful	Somewhat successful	Somewhat successful	Neutral	Neutral	2	3	5	4	6	5	5	5	6	2	4	3	3	5	NULL	5
58	I am employed / contracted / freelance	NULL	NULL	Life Sciences;Humanities / Social Sciences	Academia / university	Professor	Yes, I manage multiple people	Full-time permanent	NULL	NULL	Mostly human participants	51-6 hours	Had a conversation with you about your career aspirations;Discussed your performance;Noted your achievements;Conducted a formal appraisal						4	7	5	Extremely important	Extremely important	Extremely important	Somewhat important	Extremely successful	Extremely successful	Extremely successful	Extremely successful	Somewhat successful	Somewhat successful	Somewhat successful	Somewhat successful	6	7	7	6	2	1	1	7	5	7	6	5	2	7	3+ years	6
59	I am employed / contracted / freelance	NULL	NULL	Life Sciences	Academia / university	Professor	Yes, I manage multiple people	Full-time permanent	NULL	NULL	Mostly wet lab – based on experimental equipment and reagents	51-6 hours	Not applicable						4	2	4	Extremely important	Extremely important	Extremely important	Extremely important	N/A	N/A	N/A	N/A	Somewhat successful	Somewhat successful	Extremely successful	Somewhat successful	2	6	6	4	4	1	4	6	2	6	7	4	2	6	3+ years	7
60	I am employed / contracted / freelance	NULL	NULL	Life Sciences	Academia / university	Independent Fellow	Yes, I manage multiple people	Full-time fixed term / contract	3-5 years	NULL	Mostly computational	41-5 hours	Had a conversation with you about your career aspirations;Discussed your performance;Noted your achievements;Supported your wellbeing;Conducted a formal appraisal						1	5	3	Extremely important	Somewhat important	Extremely important	Extremely important	Somewhat successful	Neutral	Somewhat unsuccesful	Somewhat successful	Somewhat unsuccesful	Somewhat successful	Somewhat unsuccesful	Neutral	3	3	5	3	3	3	6	5	7	1	5	4	5	3	6-1 years	5
61	I am employed / contracted / freelance	NULL	NULL	Life Sciences	Academia / university	Professor	Yes, I manage multiple people	Full-time permanent	NULL	NULL	Mostly wet lab – based on experimental equipment and reagents	51-6 hours	Discussed your performance;Noted your achievements;Conducted a formal appraisal						3	3	5	Extremely important	Somewhat important	Extremely important	Extremely important	Somewhat successful	Somewhat successful	Somewhat successful	Somewhat successful	Somewhat successful	Somewhat successful	Somewhat successful	Neutral	6	6	7	5	2	3	3	7	3	6	7	4	2	6	3+ years	5
62	I am employed / contracted / freelance	NULL	NULL	Physical Sciences	Academia / university	Professor	Yes, I manage multiple people	Full-time permanent	NULL	NULL	Mostly wet lab – based on experimental equipment and reagents	31-4 hours	Discussed your performance;Conducted a formal appraisal						4	4	4	Extremely important	Extremely important	Extremely important	Extremely important	Somewhat successful	Extremely successful	Extremely successful	Extremely successful	Somewhat successful	Somewhat unsuccesful	Somewhat successful	Somewhat successful	4	4	2	6	7	5	4	7	7	2	2	5	6	5	3+ years	3
63	I am employed / contracted / freelance	NULL	NULL	Life Sciences	Academia / university	Professor	Yes, I manage multiple people	Full-time fixed term / contract	3-5 years	NULL	Mostly computational	More than 8 hours	Discussed your performance;Noted your achievements;Conducted a formal appraisal						5	6	5	Extremely important	Somewhat important	Extremely important	Extremely important	Extremely successful	Extremely successful	Extremely successful	Somewhat successful	Somewhat successful	Somewhat successful	Somewhat successful	Somewhat successful	4	6	6	4	3	3	3	7	2	5	6	2	2	5	21-3 years	4
64	I am a student	NULL	NULL	Life Sciences	NULL	NULL	NULL	NULL	NULL	Doctoral degree (PhD/DPhil/MD)	NULL	51-6 hours	Had a conversation with you about your career aspirations;Noted your achievements;Offered you training to support your skill development						6	6	4	Extremely important	Extremely important	Extremely important	Somewhat important	Extremely successful	Extremely successful	Extremely successful	Somewhat successful	Extremely successful	Extremely successful	Extremely successful	Somewhat successful	6	7	7	6	4	1	4	7	1	6	7	2	2	7	NULL	7
65	I am employed / contracted / freelance	NULL	NULL	Life Sciences	Academia / university	Professor	Yes, I manage multiple people	Full-time permanent	NULL	NULL	Mostly wet lab – based on experimental equipment and reagents	51-6 hours	Noted your achievements;Conducted a formal appraisal						6	6	6	Extremely important	Extremely important	Extremely important	Extremely important	Somewhat successful	Somewhat successful	Somewhat successful	Somewhat successful	Somewhat successful	Somewhat successful	Somewhat successful	Somewhat successful	4	6	6	6	5	3	5	7	4	7	7	6	3	6	3+ years	6
66	I am employed / contracted / freelance	NULL	NULL	Life Sciences	Academia / university	Professor	Yes, I manage multiple people	Part-time fixed term / contract	3-5 years	NULL	Mostly wet lab – based on experimental equipment and reagents	21-3 hours	None of the above						1	3	2	Extremely important	Extremely important	Extremely important	Extremely important	Extremely successful	Extremely successful	Extremely successful	Extremely successful	I don't know	Somewhat successful	Neutral	Neutral	1	1	4	4	7	6	5	4	5	2	2	3	5	5	21-3 years	1
67	I am employed / contracted / freelance	NULL	NULL	Life Sciences;Physical Sciences	Academia / university	Reader	Yes, I manage multiple people	Full-time permanent	NULL	NULL	Other - a mixture of above	71-8 hours	Conducted a formal appraisal						1	1	1	Somewhat important	Extremely important	Extremely important	Extremely important	Neutral	Extemely unsuccesful	Somewhat successful	Extemely unsuccesful	Neutral	Extemely unsuccesful	Somewhat successful	Extemely unsuccesful	1	1	1	1	7	5	4	5	7	2	1	7	7	1	11-2 years	1
68	I am employed / contracted / freelance	NULL	NULL	Life Sciences	Academia / university	Professor	Yes, I manage multiple people	Full-time permanent	NULL	NULL	Mostly wet lab – based on experimental equipment and reagents	51-6 hours	Conducted a formal appraisal						5	5	1	Extremely important	Extremely important	Extremely important	Extremely important	Extremely successful	Extremely successful	Extremely successful	Extremely successful	Somewhat successful	Extemely unsuccesful	Extemely unsuccesful	Extemely unsuccesful	1	1	4	4	1	3	7	5	6	1	1	3	3	5	3+ years	2
69	I am a student	NULL	NULL	Life Sciences	NULL	NULL	NULL	NULL	NULL	Doctoral degree (PhD/DPhil/MD)	NULL	More than 8 hours	None of the above	4	1	1	7	2	1	1	1	Extremely important	Extremely important	Extremely important	Extremely important	Extemely unsuccesful	Extemely unsuccesful	Extemely unsuccesful	Extemely unsuccesful	Extemely unsuccesful	Extemely unsuccesful	Extemely unsuccesful	Extemely unsuccesful	1	1	1	1	7	7	7	1	7	1	1	1	1	8	NULL	1
70	I am employed / contracted / freelance	NULL	NULL	Life Sciences	Academia / university	Professor	Yes, I manage multiple people	Full-time permanent	NULL	NULL	Mostly computational	71-8 hours	Provided career advice and guidance;Discussed your performance;Provided an example of appropriate ethical codes;Noted your achievements;Supported your wellbeing;Provided expert advice;Conducted a formal appraisal						6	6	6	Extremely important	Somewhat important	Extremely important	Somewhat important	Somewhat successful	Somewhat successful	Extremely successful	Somewhat successful	Somewhat successful	Somewhat successful	Extremely successful	Somewhat successful	4	6	6	5	3	3	4	6	4	6	6	3	2	5	21-3 years	6
71	I am employed / contracted / freelance	NULL	NULL	Life Sciences;Physical Sciences	Academia / university	Independent Fellow	Yes, I manage multiple people	Full-time fixed term / contract	3-5 years	NULL	Mostly computational	41-5 hours	Conducted a formal appraisal						5	6	5	Extremely important	Extremely important	Extremely important	Somewhat important	Somewhat successful	Somewhat successful	Somewhat successful	Somewhat successful	Neutral	Neutral	Neutral	Neutral	1	6	5	5	3	2	5	5	2	5	5	7	5	2	11-2 years	5
72	I am employed / contracted / freelance	NULL	NULL	Life Sciences	Academia / university	Senior Lecturer / Associate Professor	Yes, I manage multiple people	Full-time permanent	NULL	NULL	Mostly wet lab – based on experimental equipment and reagents	51-6 hours	Noted your achievements						4	4	4	Extremely important	Extremely important	Extremely important	Extremely important	Extremely successful	Extremely successful	Extremely successful	Extremely successful	Neutral	Neutral	Neutral	Neutral	4	5	4	3	4	5	7	5	6	3	4	7	6	2	11-2 years	5
73	I am employed / contracted / freelance	NULL	NULL	Life Sciences	Academia / university	Senior Lecturer / Associate Professor	Yes, I manage multiple people	Full-time fixed term / contract	Less than 1 year	NULL	Mostly wet lab – based on experimental equipment and reagents	31-4 hours	Had a conversation with you about your career aspirations;Provided career advice and guidance;Discussed your performance;Provided expert advice;Conducted a formal appraisal						3	4	3	Somewhat unimportant	Somewhat unimportant	Somewhat important	Neutral	Somewhat successful	Neutral	Somewhat successful	Somewhat successful	Somewhat unsuccesful	Neutral	Neutral	Neutral	4	5	5	5	5	5	5	3	5	4	3	3	5	2	11-2 years	5
74	I am employed / contracted / freelance	NULL	NULL	Life Sciences	Academia / university	Postdoc / Research Associate	Yes, I manage 1 person	Full-time fixed term / contract	3-5 years	NULL	Mostly wet lab – based on experimental equipment and reagents	31-4 hours	Had a conversation with you about your career aspirations;Noted your achievements;Requested your feedback on their management of you	6	4	6	4	7	4	4	4	Extremely important	Extremely important	Extremely important	Extremely important	Somewhat successful	Somewhat unsuccesful	Neutral	Neutral	Neutral	Neutral	Somewhat successful	Somewhat successful	7	6	6	4	4	3	4	5	4	4	4	6	6	5	6-1 years	6
75	I am taking a career-break / on leave (e.g. parental)	NULL	NULL	Life Sciences	Academia / university	Head of Department	NULL	NULL	NULL	NULL	NULL	NULL	NULL									Extremely important	Extremely important	Extremely important	Extremely important	NULL	NULL	NULL	NULL	NULL	NULL	NULL	NULL	6	6	6	5	5	7	1	7	6	7	7	5	7	6	3+ years	6
76	I am employed / contracted / freelance	NULL	NULL	Life Sciences;Humanities / Social Sciences	Academia / university	Reader	Yes, I manage 1 person	Full-time permanent	NULL	NULL	Mostly human participants	41-5 hours	Noted your achievements;Offered you training to support your skill development;Conducted a formal appraisal						3	3	6	Extremely important	Somewhat important	Extremely important	Extremely important	Somewhat successful	Somewhat successful	Somewhat successful	Somewhat successful	Neutral	Extremely successful	Somewhat successful	Somewhat successful	5	3	3	5	5	3	4	5	6	6	5	5	5	6	21-3 years	5
77	I am employed / contracted / freelance	NULL	NULL	Life Sciences	Academia / university	Group Leader	Yes, I manage multiple people	Full-time fixed term / contract	3-5 years	NULL	Mostly wet lab – based on experimental equipment and reagents	41-5 hours	Had a conversation with you about your career aspirations;Supported you with personal issues;Supported your wellbeing						4	3	3	Neutral	Extremely important	Somewhat important	Somewhat important	Neutral	Neutral	Somewhat successful	Neutral	Neutral	Somewhat unsuccesful	Somewhat successful	Somewhat unsuccesful	5	5	4	4	1	2	2	6	1	5	6	1	1	5	11-2 years	7
78	I am employed / contracted / freelance	NULL	NULL	Life Sciences	Academia / university	Professor	Yes, I manage multiple people	Full-time permanent	NULL	NULL	Mostly wet lab – based on experimental equipment and reagents	41-5 hours	None of the above						3	2	4	Extremely important	Extremely important	Extremely important	Extremely important	Somewhat successful	Somewhat successful	Extremely successful	Somewhat successful	Somewhat successful	Neutral	Somewhat successful	Somewhat successful	1	3	6	4	5	3	4	7	4	5	6	7	6	5	21-3 years	5
79	I am employed / contracted / freelance	NULL	NULL	Life Sciences	Not-for-profit research institute (including charity funded, research council funded etc)	Other	No	Full-time permanent	NULL	NULL	Other - a mixture of above	31-4 hours	Had a conversation with you about your career aspirations;Provided career advice and guidance;Discussed your performance;Noted your achievements;Offered you training to support your skill development;Provided an example of appropriate research standards;Connected you to others within or outside your field;Supported you with personal issues;Supported your wellbeing;Provided expert advice;Conducted…						6	5	6	Extremely important	Extremely important	Extremely important	Somewhat important	N/A	Extremely successful	N/A	Extremely successful	Extremely successful	Extremely successful	Somewhat successful	Extremely successful	6	7	6	6	3	3	3	7	3	7	7	8	3	7	11-2 years	6
80	I am a student	NULL	NULL	Physical Sciences	NULL	NULL	NULL	NULL	NULL	Doctoral degree (PhD/DPhil/MD)	NULL	41-5 hours	Had a conversation with you about your career aspirations;Provided career advice and guidance;Discussed your performance;Noted your achievements;Offered you training to support your skill development;Connected you to others within or outside your field;Supported you with personal issues;Supported your wellbeing;Provided expert advice;Conducted a formal appraisal;Discussed alternative career optio…	6	7	7	2	6	2	2	3	Extremely important	Extremely important	Extremely important	Extremely important	Extremely successful	Somewhat successful	Somewhat successful	Neutral	Extremely successful	Neutral	Somewhat successful	Neutral	3	6	4	5	3	4	5	5	6	3	5	3	2	2	NULL	6
81	I am employed / contracted / freelance	NULL	NULL	Life Sciences	Academia / university	Professor	Yes, I manage multiple people	Full-time permanent	NULL	NULL	Mostly wet lab – based on experimental equipment and reagents	51-6 hours	Had a conversation with you about your career aspirations;Noted your achievements;Conducted a formal appraisal						1	1	7	Extremely important	Somewhat important	Extremely important	Extremely important	Extremely successful	Somewhat successful	Extremely successful	Extremely successful	Somewhat successful	Neutral	Neutral	Extremely successful	4	7	5	5	7	4	7	1	7	1	5	1	7	7	3+ years	7
82	I am a student	NULL	NULL	Life Sciences	NULL	NULL	NULL	NULL	NULL	Doctoral degree (PhD/DPhil/MD)	NULL	41-5 hours	Discussed your performance;Supported you with personal issues;Supported your wellbeing;Provided expert advice	3	6	6	3	7	4	1	4	Extremely important	Neutral	Extremely important	Somewhat important	Somewhat successful	Extremely successful	Somewhat successful	Somewhat unsuccesful	Neutral	Neutral	Neutral	Somewhat unsuccesful	1	2	5	4	1	5	3	5	4	5	1	1	5	1	NULL	7
83	I am a student	NULL	NULL	Life Sciences	NULL	NULL	NULL	NULL	NULL	Doctoral degree (PhD/DPhil/MD)	NULL	41-5 hours	Had a conversation with you about your career aspirations;Provided career advice and guidance;Discussed your performance;Offered you training to support your skill development;Provided an example of appropriate research standards;Connected you to others within or outside your field;Supported you with personal issues;Supported your wellbeing;Provided expert advice;Discussed alternative career opti…	7	7	7	7	7	5	5	7	Somewhat important	Extremely important	Extremely important	Extremely important	Extremely successful	Extremely successful	Extremely successful	Somewhat successful	Somewhat successful	Extremely successful	Somewhat successful	Neutral	4	5	7	4	5	4	7	4	4	3	5	1	1	8	NULL	5
84	I am employed / contracted / freelance	NULL	NULL	Life Sciences	Academia / university	Postdoc / Research Associate	No	Full-time fixed term / contract	3-5 years	NULL	Mostly computational	41-5 hours	Had a conversation with you about your career aspirations;Provided career advice and guidance;Provided expert advice	4	7	5	1	7	4	4	3	Extremely important	Extremely important	Extremely important	Extremely important	Extremely successful	Somewhat successful	Neutral	Extemely unsuccesful	Neutral	Neutral	Neutral	Somewhat successful	6	6	6	4	1	7	7	4	3	3	5	4	4	6	3-5 years	4
85	I am employed / contracted / freelance	NULL	NULL	Life Sciences;Physical Sciences	Academia / university	Training Fellow	Yes, I manage 1 person	Full-time fixed term / contract	3-5 years	NULL	Mostly computational	31-4 hours	None of the above	1	4	5	3	7	1	1	1	Extremely important	Extremely important	Extremely important	Extremely important	Extemely unsuccesful	Extemely unsuccesful	Extemely unsuccesful	Extemely unsuccesful	Extemely unsuccesful	Extemely unsuccesful	Extemely unsuccesful	Extemely unsuccesful	5	5	6	3	7	7	7	3	6	1	1	5	7	6	6-1 years	6
86	I am employed / contracted / freelance	NULL	NULL	Life Sciences	Academia / university	Group Leader	Yes, I manage multiple people	Full-time fixed term / contract	5+ years	NULL	Mostly wet lab – based on experimental equipment and reagents	51-6 hours	Not applicable						6	6	6	Extremely important	Somewhat important	Somewhat important	Neutral	Extremely successful	Somewhat successful	Somewhat successful	Somewhat successful	Extremely successful	Neutral	Somewhat successful	Somewhat successful	7	7	7	7	5	1	3	7	2	6	6	1	5	4	11-2 years	7
87	I am employed / contracted / freelance	NULL	NULL	Life Sciences	Academia / university	Professor	Yes, I manage multiple people	Full-time permanent	NULL	NULL	Mostly wet lab – based on experimental equipment and reagents	41-5 hours	Noted your achievements;Supported your wellbeing						6	4	6	Extremely important	Extremely important	Extremely important	Extremely important	Somewhat successful	Somewhat successful	Somewhat successful	Somewhat successful	Somewhat successful	Somewhat successful	Somewhat successful	Somewhat successful	4	6	5	4	3	1	1	7	1	6	6	4	3	6	3+ years	6
88	I am employed / contracted / freelance	NULL	NULL	Life Sciences	Academia / university	Director	Yes, I manage multiple people	Full-time permanent	NULL	NULL	Mostly wet lab – based on experimental equipment and reagents	61-7 hours	Noted your achievements;Conducted a formal appraisal						4	5	5	Extremely important	Somewhat important	Somewhat important	Extremely important	N/A	N/A	N/A	N/A	Somewhat unsuccesful	Somewhat unsuccesful	Somewhat successful	Somewhat successful	4	4	5	3	3	2	4	4	5	6	6	2	3	6	3+ years	6
89	I am employed / contracted / freelance	NULL	NULL	Life Sciences	Academia / university	Postdoc / Research Associate	Yes, I manage multiple people	Full-time fixed term / contract	5+ years	NULL	Mostly wet lab – based on experimental equipment and reagents	41-5 hours	Conducted a formal appraisal	5	7	7	1	7	1	1	1	Somewhat important	Extremely important	Extremely important	Extremely important	Neutral	Extemely unsuccesful	Somewhat unsuccesful	Extemely unsuccesful	Extemely unsuccesful	Extemely unsuccesful	Extemely unsuccesful	Neutral	6	5	6	3	1	7	7	1	7	1	1	5	7	1	11-2 years	1
90	I am employed / contracted / freelance	NULL	NULL	Life Sciences	Academia / university	Director	Yes, I manage multiple people	Full-time permanent	NULL	NULL	Mostly computational	61-7 hours	Provided career advice and guidance;Noted your achievements;Offered you training to support your skill development;Supported your wellbeing						5	5	6	Extremely important	Extremely important	Extremely important	Extremely important	Extremely successful	Somewhat successful	Somewhat successful	Somewhat successful	Somewhat successful	Somewhat successful	Somewhat successful	Somewhat successful	5	7	5	4	3	2	4	7	1	5	7	6	4	6	21-3 years	6
91	I am employed / contracted / freelance	NULL	NULL	Life Sciences	Academia / university	Professor	Yes, I manage multiple people	Full-time permanent	NULL	NULL	Mostly wet lab – based on experimental equipment and reagents	51-6 hours	Conducted a formal appraisal						2	2	4	Somewhat unimportant	Extremely important	Neutral	Extremely important	Somewhat successful	Extremely successful	Extremely successful	Somewhat successful	Neutral	Neutral	Somewhat successful	Somewhat unsuccesful	2	5	4	4	3	4	2	4	6	3	4	5	7	2	3+ years	5
92	I am employed / contracted / freelance	NULL	NULL	Life Sciences	Academia / university	Director	Yes, I manage multiple people	Full-time permanent	NULL	NULL	Mostly wet lab – based on experimental equipment and reagents	71-8 hours	Discussed your performance;Supported you with personal issues;Supported your wellbeing;Conducted a formal appraisal						3	1	3	Extremely important	Extremely important	Extremely important	Extremely important	Somewhat successful	Somewhat successful	Somewhat successful	Somewhat successful	Somewhat unsuccesful	Neutral	Neutral	Neutral	2	5	5	3	3	3	3	5	3	4	5	1	3	6	3+ years	5
93	I am employed / contracted / freelance	NULL	NULL	Life Sciences	Academia / university	Professor	Yes, I manage multiple people	Full-time permanent	NULL	NULL	Mostly wet lab – based on experimental equipment and reagents	51-6 hours	Discussed your performance;Noted your achievements;Conducted a formal appraisal						4	4	4	Extremely important	Extremely important	Extremely important	Extremely important	Extremely successful	Extremely successful	Somewhat successful	Somewhat successful	Somewhat successful	Extremely successful	Somewhat successful	Somewhat successful	6	7	6	5	2	2	4	5	3	4	7	5	3	5	3+ years	7
94	I am employed / contracted / freelance	NULL	NULL	Life Sciences	Not-for-profit research institute (including charity funded, research council funded etc)	Group Leader	Yes, I manage multiple people	Full-time permanent	NULL	NULL	Mostly computational	31-4 hours	Had a conversation with you about your career aspirations;Provided career advice and guidance;Discussed your performance;Noted your achievements;Conducted a formal appraisal						4	4	4	Somewhat important	Extremely important	Extremely important	Extremely important	Somewhat successful	Somewhat unsuccesful	Neutral	Neutral	Somewhat successful	Somewhat unsuccesful	Neutral	Neutral	5	5	5	5	5	3	4	7	3	5	7	4	2	7	21-3 years	3
95	I am employed / contracted / freelance	NULL	NULL	Life Sciences	Academia / university	Lecturer / Assistant Professor	Yes, I manage multiple people	Full-time permanent	NULL	NULL	Mostly wet lab – based on experimental equipment and reagents	41-5 hours	Discussed your performance;Conducted a formal appraisal						4	3	3	Extremely important	Extremely important	Extremely important	Extremely important	Somewhat successful	Somewhat successful	Somewhat successful	Somewhat successful	Somewhat successful	Somewhat successful	Somewhat unsuccesful	Somewhat unsuccesful	4	4	4	3	4	2	6	2	7	1	3	4	5	4	11-2 years	5
96	I am employed / contracted / freelance	NULL	NULL	Life Sciences	Academia / university	Professor	Yes, I manage multiple people	Full-time permanent	NULL	NULL	Mostly wet lab – based on experimental equipment and reagents	41-5 hours	Noted your achievements;Conducted a formal appraisal						1	6	1	Extremely important	Extremely important	Extremely important	Somewhat important	Somewhat successful	Somewhat successful	Somewhat successful	Somewhat successful	Somewhat unsuccesful	Somewhat unsuccesful	Somewhat unsuccesful	Somewhat successful	7	7	4	7	5	5	6	7	6	3	6	3	3	3	21-3 years	7
97	I am employed / contracted / freelance	NULL	NULL	Life Sciences	Not-for-profit research institute (including charity funded, research council funded etc)	Reader	Yes, I manage multiple people	Full-time permanent	NULL	NULL	Mostly wet lab – based on experimental equipment and reagents	41-5 hours	Discussed your performance						3	3	4	Neutral	Extremely important	Extremely important	Somewhat important	Somewhat successful	Somewhat unsuccesful	Somewhat unsuccesful	Neutral	Neutral	Extemely unsuccesful	Somewhat unsuccesful	Neutral	2	3	2	2	6	4	4	4	7	2	3	6	6	1	21-3 years	3
98	I am employed / contracted / freelance	NULL	NULL	Life Sciences	Academia / university	Group Leader	Yes, I manage multiple people	Full-time fixed term / contract	5+ years	NULL	Mostly wet lab – based on experimental equipment and reagents	41-5 hours	Connected you to others within or outside your field						6	6	6	Extremely important	Extremely important	Extremely important	Extremely important	Somewhat successful	Somewhat successful	Somewhat successful	Extremely successful	Somewhat successful	Somewhat unsuccesful	Somewhat successful	I don't know	5	5	5	4	4	4	4	2	6	4	4	2	2	3	11-2 years	5
99	I am employed / contracted / freelance	NULL	NULL	Life Sciences	Academia / university	Dean	Yes, I manage multiple people	Full-time permanent	NULL	NULL	Mostly wet lab – based on experimental equipment and reagents	61-7 hours	Offered you training to support your skill development						6	2	7	Extremely important	Extremely important	Extremely important	Extremely important	Somewhat successful	Extremely successful	Somewhat successful	Extremely successful	Somewhat successful	Somewhat successful	Somewhat successful	Somewhat successful	3	7	6	5	3	2	2	2	2	7	6	6	2	7	21-3 years	6
100	I am employed / contracted / freelance	NULL	NULL	Life Sciences	Academia / university	Professor	Yes, I manage multiple people	Full-time permanent	NULL	NULL	Mostly wet lab – based on experimental equipment and reagents	71-8 hours	Discussed your performance;Noted your achievements;Provided expert advice;Conducted a formal appraisal						3	2	2	Extremely important	Extremely important	Extremely important	Somewhat important	Extremely successful	Extremely successful	Extremely successful	Somewhat unsuccesful	Somewhat unsuccesful	Somewhat unsuccesful	Somewhat unsuccesful	Extemely unsuccesful	2	6	6	2	2	5	7	4	8	1	4	7	7	4	3+ years	1
101	I am employed / contracted / freelance	NULL	NULL	Life Sciences	Academia / university	Professor	Yes, I manage multiple people	Full-time permanent	NULL	NULL	Mostly wet lab – based on experimental equipment and reagents	41-5 hours	Noted your achievements;Provided expert advice						3	5	5	Extremely important	Somewhat important	Extremely important	Extremely important	Somewhat successful	Somewhat successful	Somewhat successful	Somewhat unsuccesful	Somewhat unsuccesful	Neutral	Somewhat successful	Somewhat successful	3	5	5	4	2	6	5	4	5	3	4	6	5	2	3+ years	5
102	I am employed / contracted / freelance	NULL	NULL	Life Sciences	Academia / university	Independent Fellow	Yes, I manage multiple people	Full-time fixed term / contract	3-5 years	NULL	Mostly wet lab – based on experimental equipment and reagents	More than 8 hours	None of the above						1	1	1	Extremely important	Extremely important	Extremely important	Extremely important	Somewhat unsuccesful	Somewhat unsuccesful	Somewhat unsuccesful	Somewhat unsuccesful	Extemely unsuccesful	Extemely unsuccesful	Extemely unsuccesful	Extemely unsuccesful	1	1	1	4	7	7	7	1	7	1	1	7	7	1	11-2 years	1
103	I am a student	NULL	NULL	Humanities / Social Sciences	NULL	NULL	NULL	NULL	NULL	Doctoral degree (PhD/DPhil/MD)	NULL	31-4 hours	Had a conversation with you about your career aspirations;Provided career advice and guidance;Discussed your performance;Provided an example of appropriate ethical codes;Noted your achievements;Offered you training to support your skill development;Connected you to others within or outside your field;Provided expert advice;Discussed alternative career options	7		6	2	7	3	8	5	Somewhat important	Extremely important	Extremely important	Somewhat important	Somewhat successful	Somewhat successful	Somewhat successful	Somewhat unsuccesful	Somewhat unsuccesful	Somewhat successful	Somewhat successful	Somewhat unsuccesful	5	5	5	6	3	3	5	6	3	5	5	3	2	3	NULL	6
104	I am employed / contracted / freelance	NULL	NULL	Humanities / Social Sciences	Academia / university	Independent Fellow	Yes, I manage 1 person	Full-time fixed term / contract	3-5 years	NULL	Mostly human participants	31-4 hours	Discussed your performance;Provided an example of appropriate ethical codes;Noted your achievements;Offered you training to support your skill development;Provided an example of appropriate research standards;Supported you with personal issues;Provided expert advice;Conducted a formal appraisal;Requested your feedback on their management of you						4	6	4	Extremely important	Extremely important	Extremely important	Extremely important	Somewhat successful	Somewhat successful	Extremely successful	Neutral	Neutral	Neutral	Somewhat successful	Somewhat unsuccesful	3	2	4	4	2	4	3	6	4	2	6	1	6	3	Less than 1 year	6
105	I am employed / contracted / freelance	NULL	NULL	Life Sciences;Humanities / Social Sciences	Academia / university	Postdoc / Research Associate	No	Part-time fixed term / contract	1-2 years	NULL	Mostly computational	21-3 hours	Had a conversation with you about your career aspirations;Discussed your performance;Noted your achievements;Offered you training to support your skill development;Supported your wellbeing;Provided expert advice;Conducted a formal appraisal	2		7	1	7	4	5	6	Extremely important	Extremely important	Extremely important	Somewhat important	Somewhat successful	Somewhat successful	Extremely successful	Somewhat successful	Neutral	Somewhat successful	Extremely successful	Neutral	5	6	6	5	5	4	5	6	4	5	3	1	2	6	3-5 years	5
106	I am employed / contracted / freelance	NULL	NULL	Life Sciences	Academia / university	Independent Fellow	Yes, I manage multiple people	Full-time fixed term / contract	3-5 years	NULL	Mostly wet lab – based on experimental equipment and reagents	51-6 hours	Discussed your performance;Provided an example of appropriate ethical codes;Noted your achievements;Provided an example of appropriate research standards;Connected you to others within or outside your field;Supported you with personal issues;Provided expert advice;Conducted a formal appraisal						6	6	6	Extremely important	Extremely important	Extremely important	Extremely important	Somewhat successful	Somewhat successful	Somewhat successful	Somewhat successful	Extremely successful	Somewhat successful	Somewhat unsuccesful	Extremely successful	4	6	7	4	2	2	2	5	4	5	6	5	3	7	11-2 years	5
107	I am employed / contracted / freelance	NULL	NULL	Life Sciences	Academia / university	Postdoc / Research Associate	No	Full-time fixed term / contract	1-2 years	NULL	Mostly wet lab – based on experimental equipment and reagents	51-6 hours	None of the above	2	4	1	7	2	1	1	1	Extremely important	Extremely important	Extremely important	Extremely important	Extemely unsuccesful	Extemely unsuccesful	Extemely unsuccesful	Extemely unsuccesful	Extemely unsuccesful	Extemely unsuccesful	Extemely unsuccesful	Extemely unsuccesful	1	1	3	4	6	7	7	1	7	1	1	8	7	8	6-1 years	1
108	I am employed / contracted / freelance	NULL	NULL	Life Sciences	Academia / university	Professor	Yes, I manage multiple people	Full-time permanent	NULL	NULL	Mostly computational	41-5 hours	Not applicable						1	4	2	Extremely important	Extremely important	Extremely important	Somewhat important	Extremely successful	Somewhat successful	Extremely successful	I don't know	Extemely unsuccesful	Extemely unsuccesful	Somewhat successful	Somewhat successful	5	6	6	2	2	1	2	3	5	2	6	5	4	3	21-3 years	2
109	I am a student	NULL	NULL	Life Sciences	NULL	NULL	NULL	NULL	NULL	Doctoral degree (PhD/DPhil/MD)	NULL	61-7 hours	Had a conversation with you about your career aspirations;Provided career advice and guidance;Provided expert advice	4	6	6	1	5	2	2	5	Somewhat important	Extremely important	Extremely important	Extremely important	Somewhat successful	Somewhat successful	Neutral	Somewhat successful	Neutral	Somewhat successful	Somewhat successful	Extemely unsuccesful	3	5	6	6	7	5	7	4	7	5	4	6	3	3	NULL	5
110	I am employed / contracted / freelance	NULL	NULL	Life Sciences	Academia / university	Independent Fellow	Yes, I manage multiple people	Full-time fixed term / contract	3-5 years	NULL	Mostly wet lab – based on experimental equipment and reagents	61-7 hours	Conducted a formal appraisal						1	5	1	Extremely important	Extremely important	Extremely important	Extremely important	N/A	N/A	N/A	N/A	Somewhat unsuccesful	Extemely unsuccesful	Extemely unsuccesful	Extemely unsuccesful	2	3	4	3	4	4	4	5	6	1	3	3	7	5	11-2 years	2
111	I am employed / contracted / freelance	NULL	NULL	Life Sciences	Academia / university	Professor	Yes, I manage multiple people	Full-time permanent	NULL	NULL	Mostly wet lab – based on experimental equipment and reagents	31-4 hours	Not applicable						4	7	7	Extremely important	Extremely important	Extremely important	Somewhat important	Somewhat successful	Somewhat successful	Extremely successful	Somewhat successful	Neutral	Extremely successful	Extremely successful	Extremely successful	7	7	6	1	1	1	1	7	1	7	7	2	2	5	3+ years	7
112	I am a student	NULL	NULL	Life Sciences	NULL	NULL	NULL	NULL	NULL	Doctoral degree (PhD/DPhil/MD)	NULL	41-5 hours	Provided career advice and guidance;Discussed your performance;Noted your achievements;Provided an example of appropriate research standards;Connected you to others within or outside your field;Supported your wellbeing;Provided expert advice	7	7	7	2	7	6	6	4	Extremely important	Extremely important	Extremely important	Extremely important	Extremely successful	Extremely successful	Extremely successful	Somewhat successful	Somewhat successful	Somewhat successful	Extremely successful	Neutral	6	7	6	6	3	3	4	7	4	7	6	8	2	8	NULL	7
113	I am employed / contracted / freelance	NULL	NULL	Life Sciences	Academia / university	Professor	Yes, I manage multiple people	Full-time permanent	NULL	NULL	Mostly wet lab – based on experimental equipment and reagents	51-6 hours	None of the above						4	5	3	Extremely important	Extremely important	Extremely important	Extremely important	Somewhat successful	Somewhat successful	Extremely successful	Extremely successful	Somewhat successful	Somewhat successful	Somewhat successful	Somewhat successful	5	3	5	5	5	5	5	6	5	6	5	3	4	5	3+ years	5
114	I used to be part of the research community, but no longer am	I'm no longer interested in a research-related career;My contract ended / my role was terminated;Too difficult to find a job / insecure career path;Too difficult to obtain funding	3-5 years ago	Life Sciences	NULL	NULL	NULL	NULL	NULL	NULL	NULL	NULL	NULL									Extremely important	Extremely important	Extremely important	Extremely important	NULL	NULL	NULL	NULL	NULL	NULL	NULL	NULL	6	5	4	3	5	3	8	8	8	2	8	8	8	8	NULL	3
115	I am employed / contracted / freelance	NULL	NULL	Physical Sciences	Academia / university	Professor	Yes, I manage multiple people	Full-time permanent	NULL	NULL	Mostly computational	31-4 hours	Discussed your performance;Offered you training to support your skill development;Supported you with personal issues;Supported your wellbeing;Provided expert advice;Conducted a formal appraisal						7	7	4	Somewhat important	Extremely important	Extremely important	Extremely important	Somewhat successful	Extremely successful	Somewhat successful	Neutral	Somewhat successful	Extremely successful	Somewhat successful	Neutral	4	5	5	5	4	2	4	6	3	6	6	4	3	5	21-3 years	5
116	I am a student	NULL	NULL	Life Sciences	NULL	NULL	NULL	NULL	NULL	Doctoral degree (PhD/DPhil/MD)	NULL	31-4 hours	Discussed your performance;Offered you training to support your skill development;Provided expert advice	6	6	6	4	6	4	3	4	Neutral	Somewhat important	Somewhat important	Somewhat important	Neutral	Neutral	Somewhat successful	Somewhat unsuccesful	Neutral	Neutral	Neutral	Neutral	6	6	5	4	4	3	4	5	5	4	5	8	5	8	NULL	5
117	I am a student	NULL	NULL	Life Sciences	NULL	NULL	NULL	NULL	NULL	Doctoral degree (PhD/DPhil/MD)	NULL	31-4 hours	Had a conversation with you about your career aspirations;Provided career advice and guidance;Discussed your performance;Noted your achievements;Provided an example of appropriate research standards;Connected you to others within or outside your field;Supported your wellbeing	4	7	7	1	7	4	1	3	Extremely important	Extremely important	Extremely important	Extremely important	Somewhat successful	Somewhat successful	Extremely successful	Somewhat successful	Somewhat unsuccesful	Somewhat unsuccesful	Somewhat unsuccesful	Somewhat unsuccesful	6	7	8	4	1	4	7	4	4	3	7	1	1	8	NULL	4
118	I am employed / contracted / freelance	NULL	NULL	Life Sciences	Academia / university	Postdoc / Research Associate	Yes, I manage 1 person	Full-time fixed term / contract	3-5 years	NULL	Mostly wet lab – based on experimental equipment and reagents	41-5 hours	Had a conversation with you about your career aspirations;Noted your achievements;Provided expert advice;Discussed alternative career options	4	4	5	2	6	5	3	4	Extremely important	Extremely important	Extremely important	Extremely important	Somewhat successful	Somewhat successful	Somewhat successful	Somewhat unsuccesful	Somewhat successful	Neutral	Somewhat successful	Somewhat unsuccesful	2	3	4	4	4	5	5	5	4	4	5	5	2	4	6-1 years	3
119	I am employed / contracted / freelance	NULL	NULL	Life Sciences	Not-for-profit research institute (including charity funded, research council funded etc)	Director	Yes, I manage multiple people	Full-time permanent	NULL	NULL	Mostly wet lab – based on experimental equipment and reagents	51-6 hours	Not applicable						8	6	5	Extremely important	Extremely important	Extremely important	Somewhat important	Somewhat successful	Somewhat successful	Somewhat successful	Somewhat successful	Somewhat successful	Extremely successful	Somewhat successful	Neutral	5	7	5	4	2	1	4	7	4	6	8	8	8	8	3+ years	6
120	I am a student	NULL	NULL	Life Sciences	NULL	NULL	NULL	NULL	NULL	Doctoral degree (PhD/DPhil/MD)	NULL	51-6 hours	Discussed your performance;Offered you training to support your skill development	5	6	4	4	5	3	3	2	Somewhat important	Extremely important	Extremely important	Extremely important	Somewhat successful	Somewhat unsuccesful	Somewhat successful	Somewhat successful	Somewhat successful	Somewhat unsuccesful	Somewhat unsuccesful	Somewhat unsuccesful	2	5	4	4	7	6	5	6	3	3	5	6	6	6	NULL	4
121	I am a student	NULL	NULL	Humanities / Social Sciences	NULL	NULL	NULL	NULL	NULL	Doctoral degree (PhD/DPhil/MD)	NULL	41-5 hours	Had a conversation with you about your career aspirations;Provided career advice and guidance;Discussed your performance;Noted your achievements;Offered you training to support your skill development;Provided expert advice;Conducted a formal appraisal	7	7	7	1	7	3	2	3	Somewhat important	Somewhat important	Extremely important	Extremely important	Somewhat unsuccesful	Somewhat unsuccesful	I don't know	Neutral	Somewhat unsuccesful	Somewhat unsuccesful	I don't know	Somewhat unsuccesful	5	5	5	4	4	5	4	6	5	5	6	1	1	8	NULL	6
122	I am employed / contracted / freelance	NULL	NULL	Humanities / Social Sciences	Academia / university	Lecturer / Assistant Professor	No	Full-time permanent	NULL	NULL	Mostly primary sources / artefacts	41-5 hours	Discussed your performance;Conducted a formal appraisal						1	1	1	Somewhat important	Extremely important	Somewhat important	Extremely important	Extemely unsuccesful	Somewhat successful	Somewhat successful	Extemely unsuccesful	Neutral	Somewhat unsuccesful	Somewhat successful	Somewhat unsuccesful	2	3	2	2	7	4	4	4	7	1	2	7	7	1	11-2 years	2
123	I am employed / contracted / freelance	NULL	NULL	Life Sciences	Academia / university	Head of Department	Yes, I manage multiple people	Full-time permanent	NULL	NULL	Mostly wet lab – based on experimental equipment and reagents	41-5 hours	Had a conversation with you about your career aspirations;Provided career advice and guidance;Discussed your performance;Provided an example of appropriate ethical codes;Noted your achievements;Offered you training to support your skill development;Provided an example of appropriate research standards;Connected you to others within or outside your field;Supported you with personal issues;Provided…						6	6	3	Extremely important	Extremely important	Extremely important	Extremely important	Somewhat successful	Somewhat successful	Somewhat successful	Extremely successful	Somewhat successful	Neutral	Neutral	Somewhat successful	3	5	4	4	2	1	2	7	3	6	5	6	5	5	21-3 years	6
124	I am employed / contracted / freelance	NULL	NULL	Life Sciences	Academia / university	Professor	Yes, I manage multiple people	Part-time permanent	NULL	NULL	Mostly human participants	31-4 hours	Had a conversation with you about your career aspirations;Discussed your performance;Noted your achievements;Supported your wellbeing;Provided expert advice;Conducted a formal appraisal						7	7	7	Extremely important	Extremely important	Extremely important	Somewhat important	Extremely successful	Extremely successful	Extremely successful	Extremely successful	Extremely successful	Somewhat successful	Extremely successful	Somewhat successful	5	6	7	5	2	1	2	7	2	7	7	2	2	7	21-3 years	7
125	I am employed / contracted / freelance	NULL	NULL	Humanities / Social Sciences	Academia / university	Group Leader	Yes, I manage multiple people	Full-time fixed term / contract	3-5 years	NULL	Mostly human participants	41-5 hours	Had a conversation with you about your career aspirations;Provided career advice and guidance;Discussed your performance;Supported you with personal issues;Conducted a formal appraisal						5	6	3	Extremely important	Somewhat important	Extremely important	Extremely important	Extremely successful	Neutral	Somewhat successful	Somewhat unsuccesful	Extremely successful	Neutral	Somewhat successful	Somewhat unsuccesful	3	5	6	6	3	5	5	3	4	5	6	2	2	7	11-2 years	6
126	I am employed / contracted / freelance	NULL	NULL	Life Sciences	Other	Lecturer / Assistant Professor	Yes, I manage multiple people	Part-time fixed term / contract	Less than 1 year	NULL	In the field	51-6 hours	None of the above						1	2	4	Somewhat important	Extremely important	Somewhat important	Somewhat important	Extemely unsuccesful	Somewhat unsuccesful	Extemely unsuccesful	Somewhat unsuccesful	Extemely unsuccesful	Somewhat unsuccesful	Somewhat unsuccesful	Somewhat unsuccesful	1	1	1	1	1	7	7	2	7	1	2	5	7	2	6-1 years	6
127	I am a student	NULL	NULL	Life Sciences;Physical Sciences	NULL	NULL	NULL	NULL	NULL	Doctoral degree (PhD/DPhil/MD)	NULL	51-6 hours	Had a conversation with you about your career aspirations;Provided career advice and guidance;Discussed your performance;Provided an example of appropriate ethical codes;Noted your achievements;Offered you training to support your skill development;Provided an example of appropriate research standards;Supported you with personal issues;Supported your wellbeing;Provided expert advice;Conducted a f…	7	7	7	5	7	5	7	5	Extremely important	Extremely important	Extremely important	Extremely important	Somewhat successful	Somewhat successful	Extremely successful	Somewhat successful	Extremely successful	Extremely successful	Extremely successful	Extremely successful	7	7	7	7	1	2	2	8	1	7	7	1	1	7	NULL	7
128	I am employed / contracted / freelance	NULL	NULL	Humanities / Social Sciences;Other	Academia / university	Postdoc / Research Associate	No	Part-time fixed term / contract	3-5 years	NULL	Mostly human participants	21-3 hours	Provided career advice and guidance;Offered you training to support your skill development;Provided expert advice	5			2	7	5	4	5	Extremely important	Extremely important	Extremely important	Extremely important	Extremely successful	Extremely successful	Extremely successful	Somewhat successful	Somewhat successful	Somewhat successful	Somewhat successful	Somewhat successful	7	6	6	3	3	1	1	7	1	7	7	1	1	5	6-1 years	3
129	I am employed / contracted / freelance	NULL	NULL	Life Sciences	Academia / university	Postdoc / Research Associate	No	Full-time fixed term / contract	1-2 years	NULL	Mostly wet lab – based on experimental equipment and reagents	31-4 hours	Had a conversation with you about your career aspirations;Provided career advice and guidance;Noted your achievements;Discussed alternative career options	3	5	4	5	6	5	4	4	Extremely important	Somewhat important	Extremely important	Somewhat important	Extremely successful	Somewhat unsuccesful	Somewhat unsuccesful	Extemely unsuccesful	Extremely successful	Somewhat successful	Somewhat successful	Somewhat unsuccesful	7	3	4	5	2	5	6	5	5	2	4	1	3	3	6-1 years	7
130	I am employed / contracted / freelance	NULL	NULL	Life Sciences;Physical Sciences	Academia / university	Senior Lecturer / Associate Professor	Yes, I manage multiple people	Full-time permanent	NULL	NULL	Mostly computational	31-4 hours	Offered you training to support your skill development;Connected you to others within or outside your field;Provided expert advice						6	6	5	Extremely important	Extremely important	Extremely important	Somewhat important	Somewhat successful	Neutral	Somewhat successful	Somewhat successful	Somewhat successful	Somewhat successful	Somewhat successful	Somewhat successful	7	6	5	4	4	2	4	6	3	6	6	4	3	6	11-2 years	5
131	I am a student	NULL	NULL	Life Sciences	NULL	NULL	NULL	NULL	NULL	Doctoral degree (PhD/DPhil/MD)	NULL	41-5 hours	Discussed your performance;Noted your achievements;Offered you training to support your skill development;Provided an example of appropriate research standards;Connected you to others within or outside your field;Supported your wellbeing;Provided expert advice;Conducted a formal appraisal;Requested your feedback on their management of you	7	7	7	1	7	4	6	3	Extremely important	Extremely important	Extremely important	Extremely important	Somewhat successful	Extremely successful	Extremely successful	Somewhat successful	Somewhat successful	Somewhat unsuccesful	Neutral	Neutral	5	7	6	4	1	4	6	5	6	4	6	8	2	8	NULL	7
132	I am employed / contracted / freelance	NULL	NULL	Life Sciences	Not-for-profit research institute (including charity funded, research council funded etc)	Group Leader	Yes, I manage multiple people	Full-time permanent	NULL	NULL	Mostly wet lab – based on experimental equipment and reagents	51-6 hours	Provided career advice and guidance;Discussed your performance;Noted your achievements;Supported you with personal issues;Provided expert advice;Conducted a formal appraisal						6	5	6	Extremely important	Extremely important	Extremely important	Somewhat important	Extemely unsuccesful	Extemely unsuccesful	Extemely unsuccesful	Extemely unsuccesful	Extemely unsuccesful	Extemely unsuccesful	Extemely unsuccesful	Extemely unsuccesful	6	6	6	6	2	1	1	7	1	6	7	2	2	7	3-5 years	6
133	I am employed / contracted / freelance	NULL	NULL	Life Sciences	Academia / university	Professor	Yes, I manage multiple people	Full-time permanent	NULL	NULL	In the field	61-7 hours	Noted your achievements;Connected you to others within or outside your field;Supported you with personal issues;Conducted a formal appraisal						6	6	6	Extremely important	Extremely important	Extremely important	Extremely important	Somewhat successful	Somewhat successful	Extremely successful	Somewhat successful	Somewhat successful	Extremely successful	Somewhat successful	Somewhat successful	4	6	6	3	2	1	1	5	2	7	7	5	2	6	21-3 years	6
134	I am employed / contracted / freelance	NULL	NULL	Other	Government laboratory	Research / Technical Specialist	No	Full-time fixed term / contract	3-5 years	NULL	Mostly computational	51-6 hours	Discussed your performance;Conducted a formal appraisal						1	1	1	Extremely important	Extremely important	Extremely important	Somewhat important	Somewhat unsuccesful	Extemely unsuccesful	Extemely unsuccesful	Somewhat unsuccesful	Somewhat unsuccesful	Somewhat unsuccesful	Somewhat unsuccesful	Somewhat unsuccesful	1	1	1	3	7	7	7	1	7	1	1	4	7	8	11-2 years	2
135	I am employed / contracted / freelance	NULL	NULL	Other	Academia / university	Lecturer / Assistant Professor	No	Full-time permanent	NULL	NULL	Mostly human participants	41-5 hours	Noted your achievements;Offered you training to support your skill development;Connected you to others within or outside your field;Provided expert advice;Conducted a formal appraisal						2	3	4	Extremely important	Somewhat important	Extremely important	Somewhat important	Somewhat unsuccesful	Somewhat unsuccesful	Neutral	Somewhat successful	Somewhat successful	Neutral	Somewhat unsuccesful	Extremely successful	6	2	4	4	5	3	6	3	5	2	1	5	7	4	1-2 years	5
136	I am employed / contracted / freelance	NULL	NULL	Life Sciences	Academia / university	Professor	Yes, I manage multiple people	Full-time permanent	NULL	NULL	Mostly wet lab – based on experimental equipment and reagents	51-6 hours	Conducted a formal appraisal						1	1	2	Extremely important	Extremely important	Extremely important	Extremely important	Extremely successful	Extremely successful	Extremely successful	Extremely successful	Extemely unsuccesful	Extemely unsuccesful	Extemely unsuccesful	Somewhat unsuccesful	4	4	2	4	4	4	7	1	7	1	2	3	7	2	3+ years	6
137	I am employed / contracted / freelance	NULL	NULL	Life Sciences	Academia / university	Professor	Yes, I manage multiple people	Full-time permanent	NULL	NULL	Mostly human participants	51-6 hours	Had a conversation with you about your career aspirations;Provided career advice and guidance;Discussed your performance;Noted your achievements;Offered you training to support your skill development;Connected you to others within or outside your field;Supported you with personal issues;Supported your wellbeing;Provided expert advice						7	7	6	Extremely important	Somewhat important	Extremely important	Extremely important	Extremely successful	Somewhat successful	Extremely successful	Extremely successful	Neutral	Neutral	Neutral	Neutral	7	7	7	6	1	1	1	7	1	7	7	1	1	4	11-2 years	7
138	I am employed / contracted / freelance	NULL	NULL	Life Sciences	Not-for-profit research institute (including charity funded, research council funded etc)	Postdoc / Research Associate	No	Full-time fixed term / contract	Less than 1 year	NULL	Mostly computational	41-5 hours	None of the above	6		2	5	1	1	1	1	Somewhat important	Extremely important	Somewhat important	Neutral	Somewhat unsuccesful	Somewhat unsuccesful	Somewhat unsuccesful	Somewhat unsuccesful	Extemely unsuccesful	Extemely unsuccesful	Extemely unsuccesful	Extemely unsuccesful	3	1	2	2	6	6	6	2	7	2	2	6	5	2	11-2 years	2
139	I am a student	NULL	NULL	Life Sciences	NULL	NULL	NULL	NULL	NULL	Doctoral degree (PhD/DPhil/MD)	NULL	51-6 hours	Had a conversation with you about your career aspirations;Provided career advice and guidance;Discussed your performance;Noted your achievements;Offered you training to support your skill development;Connected you to others within or outside your field;Supported you with personal issues;Supported your wellbeing;Provided expert advice;Conducted a formal appraisal;Discussed alternative career optio…	6	7	7	1	7	2	2	2	Extremely important	Extremely important	Extremely important	Extremely important	Somewhat successful	Extremely successful	Extremely successful	Somewhat successful	Neutral	Somewhat successful	Somewhat unsuccesful	Neutral	5	7	6	3	1	5	7	3	4	3	3	8	2	2	NULL	5
140	I am employed / contracted / freelance	NULL	NULL	Humanities / Social Sciences	Academia / university	Independent Fellow	Yes, I manage multiple people	Part-time fixed term / contract	3-5 years	NULL	Mostly primary sources / artefacts	51-6 hours	Had a conversation with you about your career aspirations;Discussed your performance;Conducted a formal appraisal						3	2	2	Somewhat important	Extremely important	Extremely important	Extremely important	Neutral	Neutral	Somewhat successful	Neutral	Neutral	Somewhat unsuccesful	Somewhat successful	Somewhat successful	3	6	4	3	5	4	4	6	4	4	5	7	5	2	11-2 years	5
141	I am employed / contracted / freelance	NULL	NULL	Life Sciences	Academia / university	Training Fellow	Yes, I manage multiple people	Full-time permanent	NULL	NULL	Mostly human participants	61-7 hours	Provided career advice and guidance;Discussed your performance;Noted your achievements;Offered you training to support your skill development;Provided an example of appropriate research standards;Connected you to others within or outside your field;Supported you with personal issues;Supported your wellbeing;Provided expert advice;Conducted a formal appraisal	2	7	7	2	6	6	5	5	Extremely important	Extremely important	Extremely important	Extremely important	Somewhat successful	Somewhat successful	Somewhat successful	Extremely successful	Somewhat successful	Somewhat successful	Somewhat successful	Somewhat successful	4	5	6	5	5	3	4	6	3	6	7	3	5	5	11-2 years	5
142	I am employed / contracted / freelance	NULL	NULL	Life Sciences	Academia / university	Group Leader	Yes, I manage multiple people	Full-time fixed term / contract	3-5 years	NULL	Mostly wet lab – based on experimental equipment and reagents	51-6 hours	Not applicable						2	8	3	Somewhat important	Extremely important	Extremely important	Somewhat important	N/A	N/A	N/A	N/A	Somewhat successful	Neutral	Somewhat successful	Somewhat successful	5	5	5	5	1	3	5	4	4	5	6	3	3	6	11-2 years	5
143	I am employed / contracted / freelance	NULL	NULL	Life Sciences	Academia / university	Group Leader	Yes, I manage multiple people	Full-time fixed term / contract	3-5 years	NULL	Mostly wet lab – based on experimental equipment and reagents	61-7 hours	Discussed your performance;Offered you training to support your skill development;Connected you to others within or outside your field;Supported you with personal issues;Conducted a formal appraisal						5	5	6	Neutral	Extremely important	Extremely important	Extremely important	Somewhat successful	Somewhat successful	Somewhat successful	Somewhat successful	Extremely successful	Somewhat successful	Extremely successful	Extremely successful	4	6	7	7	8	2	4	7	2	6	6	4	1	3	11-2 years	7
144	I used to be part of the research community, but no longer am	I wanted to apply my skills elsewhere;Too difficult to find a job / insecure career path;For a better work-life balance	5+ years ago	NULL	NULL	NULL	NULL	NULL	NULL	NULL	NULL	NULL	NULL									NULL	NULL	NULL	NULL	NULL	NULL	NULL	NULL	NULL	NULL	NULL	NULL															NULL
145	I am employed / contracted / freelance	NULL	NULL	Life Sciences	Academia / university	Group Leader	Yes, I manage multiple people	Full-time permanent	NULL	NULL	Mostly wet lab – based on experimental equipment and reagents	31-4 hours	Noted your achievements;Supported your wellbeing;Provided expert advice						4	3	5	Extremely important	Somewhat important	Somewhat important	Extremely important	Somewhat successful	Somewhat successful	Somewhat successful	Somewhat successful	Somewhat successful	Neutral	Somewhat successful	Somewhat successful	6	6	7	5	2	2	5	6	3	6	7	2	2	5	3+ years	6
146	Other	NULL	NULL	Life Sciences	NULL	NULL	NULL	NULL	NULL	NULL	NULL	NULL	NULL									Extremely important	Extremely important	Extremely important	Extremely important	NULL	NULL	NULL	NULL	NULL	NULL	NULL	NULL	6	5	5	4	2	5	5	7	4	6	4	5	4	8	NULL	6
147	I am employed / contracted / freelance	NULL	NULL	Humanities / Social Sciences	Academia / university	Lecturer / Assistant Professor	Yes, I manage 1 person	Full-time permanent	NULL	NULL	Mostly human participants	31-4 hours	Had a conversation with you about your career aspirations;Discussed your performance;Noted your achievements;Connected you to others within or outside your field;Conducted a formal appraisal						4	2	5	Somewhat important	Extremely important	Extremely important	Extremely important	Somewhat unsuccesful	Somewhat unsuccesful	Somewhat successful	Extemely unsuccesful	Somewhat unsuccesful	Somewhat unsuccesful	Somewhat successful	Extemely unsuccesful	5	4	4	2	2	4	5	5	6	4	3	5	5	5	6-1 years	6
148	I am employed / contracted / freelance	NULL	NULL	Life Sciences	Academia / university	Professor	Yes, I manage multiple people	Full-time permanent	NULL	NULL	Mostly wet lab – based on experimental equipment and reagents	51-6 hours	Had a conversation with you about your career aspirations;Discussed your performance;Noted your achievements;Conducted a formal appraisal						5	5	5	Extremely important	Extremely important	Extremely important	Extremely important	Extremely successful	Extremely successful	Extremely successful	Somewhat successful	Extremely successful	Extremely successful	Extremely successful	Somewhat successful	5	5	6	5	4	4	4	6	4	4	5	3	3	6	11-2 years	6
149	I am employed / contracted / freelance	NULL	NULL	Life Sciences	Academia / university	Lecturer / Assistant Professor	Yes, I manage multiple people	Full-time permanent	NULL	NULL	Mostly wet lab – based on experimental equipment and reagents	71-8 hours	Had a conversation with you about your career aspirations;Discussed your performance;Conducted a formal appraisal						5	3	5	Extremely important	Extremely important	Extremely important	Extremely important	Somewhat successful	Extremely successful	Somewhat successful	Somewhat successful	Neutral	Somewhat successful	Somewhat unsuccesful	Somewhat unsuccesful	4	6	5	3	2	4	4	5	6	2	1	7	7	5	11-2 years	5
150	I am employed / contracted / freelance	NULL	NULL	Life Sciences;Physical Sciences	Academia / university	Professor	Yes, I manage multiple people	Full-time fixed term / contract	5+ years	NULL	Mostly computational	51-6 hours	None of the above						4	3	4	Somewhat important	Extremely important	Extremely important	Extremely important	Somewhat successful	Somewhat unsuccesful	Somewhat unsuccesful	Neutral	Somewhat unsuccesful	Extemely unsuccesful	Neutral	Extemely unsuccesful	1	2	4	5	6	3	5	3	3	2	4	5	4	5	21-3 years	1
151	I used to be part of the research community, but no longer am	I wanted to apply my skills elsewhere;Too difficult to find a job / insecure career path;For career progression / development;It was impacting on my wellbeing and mental health	1-2 years ago	Physical Sciences	NULL	NULL	NULL	NULL	NULL	NULL	NULL	NULL	NULL									Extremely important	Extremely important	Extremely important	Extremely important	NULL	NULL	NULL	NULL	NULL	NULL	NULL	NULL	6	6	6	6	1	1	8	6	4	3	3	2	2	8	NULL	6
152	I am employed / contracted / freelance	NULL	NULL	Life Sciences	Government laboratory	Group Leader	No	Full-time fixed term / contract	5+ years	NULL	Mostly human participants	31-4 hours	Connected you to others within or outside your field						4	4	4	Extremely important	Extremely important	Extremely important	Extremely important	Somewhat successful	Neutral	Neutral	Neutral	Somewhat successful	Neutral	Neutral	Neutral	6	5	6	5	4	4	6	6	4	5	5	5	4	4	3+ years	7
153	I am employed / contracted / freelance	NULL	NULL	Life Sciences	Academia / university	Research Support Staff	No	Full-time permanent	NULL	NULL	Mostly computational	31-4 hours	Discussed your performance;Provided an example of appropriate ethical codes;Provided an example of appropriate research standards;Supported you with personal issues;Supported your wellbeing;Conducted a formal appraisal						1	1	7	Extremely important	Extremely important	Extremely important	Extremely important	Somewhat successful	Extemely unsuccesful	Somewhat successful	Extemely unsuccesful	Somewhat unsuccesful	Somewhat unsuccesful	Somewhat successful	Extemely unsuccesful	6	4	3	1	1	5	3	7	1	7	7	8	8	8	3-5 years	2
154	I am employed / contracted / freelance	NULL	NULL	Life Sciences;Physical Sciences	Academia / university	Independent Fellow	Yes, I manage multiple people	Full-time fixed term / contract	3-5 years	NULL	Mostly wet lab – based on experimental equipment and reagents	31-4 hours	Had a conversation with you about your career aspirations;Provided career advice and guidance;Discussed your performance;Noted your achievements;Offered you training to support your skill development;Provided expert advice						3	3	2	Extremely important	Extremely important	Extremely important	Extremely important	Somewhat successful	Somewhat successful	Somewhat successful	Somewhat successful	Somewhat successful	Somewhat successful	Neutral	Extremely successful	7	7	7	5	4	3	4	3	6	5	6	4	3	5	3-5 years	6
155	I am employed / contracted / freelance	NULL	NULL	Life Sciences	Academia / university	Dean	Yes, I manage multiple people	Full-time permanent	NULL	NULL	Mostly wet lab – based on experimental equipment and reagents	31-4 hours	Had a conversation with you about your career aspirations;Discussed your performance;Conducted a formal appraisal						3	3	4	Extremely important	Extremely important	Extremely important	Extremely important	Somewhat successful	Somewhat unsuccesful	Somewhat successful	Somewhat successful	Somewhat successful	Somewhat successful	Somewhat successful	Neutral	4	5	5	5	5	5	6	6	5	7	6	6	4	6	21-3 years	6
156	I am employed / contracted / freelance	NULL	NULL	Other	Academia / university	Other	Yes, I manage multiple people	Full-time fixed term / contract	1-2 years	NULL	Mostly computational	31-4 hours	Had a conversation with you about your career aspirations;Discussed your performance;Noted your achievements;Offered you training to support your skill development;Provided an example of appropriate research standards;Connected you to others within or outside your field;Conducted a formal appraisal;Discussed alternative career options						5	5	5	Extremely important	Somewhat important	Extremely important	Extremely important	Neutral	Somewhat successful	Extremely successful	Somewhat successful	Somewhat successful	Somewhat successful	Extremely successful	Somewhat successful	5	6	5	4	3	4	4	6	5	5	6	6	5	5	21-3 years	6
157	I am employed / contracted / freelance	NULL	NULL	Life Sciences	Academia / university	Head of Department	Yes, I manage multiple people	Full-time permanent	NULL	NULL	In the field	51-6 hours	None of the above						6	6	8	Somewhat important	Somewhat important	Extremely important	Extremely important	Somewhat successful	Extremely successful	Extremely successful	Extremely successful	Somewhat successful	Extremely successful	Extremely successful	Extremely successful	5	5	5	6	4	1	2	7	2	7	7	7	2	7	21-3 years	7
158	I am employed / contracted / freelance	NULL	NULL	Life Sciences;Physical Sciences	Academia / university	Professor	Yes, I manage multiple people	Full-time permanent	NULL	NULL	Mostly wet lab – based on experimental equipment and reagents	61-7 hours	Not applicable						4	8	2	Extremely important	Extremely important	Extremely important	Extremely important	Somewhat successful	Somewhat successful	Extremely successful	Extremely successful	Somewhat successful	Somewhat successful	Somewhat successful	Somewhat successful	4	5	7	6	1	1	1	7	3	5	5	5	5	5	21-3 years	6
159	I am a student	NULL	NULL	Life Sciences	NULL	NULL	NULL	NULL	NULL	Doctoral degree (PhD/DPhil/MD)	NULL	41-5 hours	Had a conversation with you about your career aspirations;Provided career advice and guidance;Discussed your performance;Noted your achievements;Supported you with personal issues;Supported your wellbeing	7	5	4	5	6	2	2	2	Extremely important	Extremely important	Somewhat important	Extremely important	Neutral	Somewhat successful	Neutral	Extemely unsuccesful	Somewhat successful	Somewhat successful	Somewhat successful	Somewhat unsuccesful	1	5	3	2	6	5	7	3	3	2	5	1	4	1	NULL	2
160	I am employed / contracted / freelance	NULL	NULL	Life Sciences	Academia / university	Group Leader	Yes, I manage multiple people	Full-time fixed term / contract	5+ years	NULL	Mostly human participants	More than 8 hours	Supported your wellbeing						6	2	2	Extremely important	Somewhat important	Somewhat important	Somewhat important	Somewhat successful	Extremely successful	Somewhat successful	Somewhat successful	Neutral	Somewhat successful	Somewhat successful	Somewhat unsuccesful	1	2	2	4	6	2	1	5	7	2	4	2	5	2	21-3 years	6
161	I am employed / contracted / freelance	NULL	NULL	Life Sciences	Academia / university	Independent Fellow	Yes, I manage 1 person	Part-time fixed term / contract	3-5 years	NULL	Mostly wet lab – based on experimental equipment and reagents	31-4 hours	Supported you with personal issues;Conducted a formal appraisal						4	3	1	Somewhat important	Extremely important	Extremely important	Neutral	Somewhat successful	Somewhat successful	Somewhat successful	Neutral	Neutral	Somewhat unsuccesful	Somewhat unsuccesful	Somewhat successful	7	3	6	3	7	6	7	1	7	1	2	3	1	7	6-1 years	5
162	I am employed / contracted / freelance	NULL	NULL	Life Sciences	Other	Lecturer / Assistant Professor	No	Full-time fixed term / contract	1-2 years	NULL	Mostly computational	41-5 hours	None of the above						8	2	2	Somewhat important	Extremely important	Extremely important	Extremely important	Neutral	Neutral	Neutral	Neutral	Somewhat successful	Somewhat successful	Somewhat successful	Somewhat successful	2	2	2	2	2	2	2	7	5	4	6	1	4	6	3-5 years	3
163	I am employed / contracted / freelance	NULL	NULL	Life Sciences	Academia / university	Group Leader	Yes, I manage multiple people	Full-time permanent	NULL	NULL	Mostly wet lab – based on experimental equipment and reagents	41-5 hours	Provided career advice and guidance;Discussed your performance;Noted your achievements;Conducted a formal appraisal						4	4	5	Extremely important	Extremely important	Extremely important	Extremely important	Somewhat successful	Somewhat successful	Extremely successful	Somewhat successful	N/A	Neutral	Somewhat successful	Somewhat unsuccesful	2	6	5	3	6	3	7	7	5	5	5	3	3	5	21-3 years	5
164	I am employed / contracted / freelance	NULL	NULL	Life Sciences	Academia / university	Professor	Yes, I manage multiple people	Full-time permanent	NULL	NULL	Mostly computational	51-6 hours	Not applicable						5	5	5	Extremely important	Extremely important	Extremely important	Extremely important	Extremely successful	Extremely successful	Extremely successful	Somewhat successful	Extremely successful	Somewhat successful	Somewhat successful	Somewhat successful	4	5	6	5	6	5	5	5	4	4	6	5	5	5	11-2 years	7
165	I am employed / contracted / freelance	NULL	NULL	Life Sciences	Academia / university	Senior Lecturer / Associate Professor	Yes, I manage multiple people	Full-time permanent	NULL	NULL	Mostly wet lab – based on experimental equipment and reagents	31-4 hours	Had a conversation with you about your career aspirations;Provided career advice and guidance;Discussed your performance;Noted your achievements;Conducted a formal appraisal;Requested your feedback on their management of you						5	2	5	Extremely important	Extremely important	Extremely important	Somewhat important	Somewhat successful	Somewhat successful	Neutral	Somewhat successful	Neutral	Somewhat successful	Somewhat unsuccesful	Somewhat unsuccesful	4	4	3	6	3	2	7	1	7	2	5	4	4	6	11-2 years	2
166	I am employed / contracted / freelance	NULL	NULL	Life Sciences	Academia / university	Professor	Yes, I manage multiple people	Full-time permanent	NULL	NULL	Mostly wet lab – based on experimental equipment and reagents	51-6 hours	Not applicable						4	7	7	Somewhat important	Neutral	Extremely important	Extremely important	Neutral	Somewhat successful	Extremely successful	Extremely successful	Neutral	Somewhat successful	Extremely successful	Extremely successful	7	7	7	4	1	1	1	7	1	7	7	1	1	7	3+ years	7
167	I am employed / contracted / freelance	NULL	NULL	Humanities / Social Sciences	Academia / university	Other - Manager	No	Full-time fixed term / contract	3-5 years	NULL	Mostly human participants	41-5 hours	Had a conversation with you about your career aspirations;Provided career advice and guidance;Discussed your performance;Noted your achievements;Offered you training to support your skill development;Supported you with personal issues;Provided expert advice;Discussed alternative career options						1	1	1	I don't know	I don't know	I don't know	I don't know	Somewhat successful	Extremely successful	Somewhat successful	Somewhat successful	Somewhat successful	Somewhat successful	Somewhat successful	Somewhat successful	7	7	7	7	1	4	4	7	2	7	7	8	8	7	3-5 years	7
168	I am employed / contracted / freelance	NULL	NULL	Humanities / Social Sciences	Not-for-profit research institute (including charity funded, research council funded etc)	Training Fellow	Yes, I manage multiple people	Full-time fixed term / contract	3-5 years	NULL	Mostly human participants	51-6 hours	Had a conversation with you about your career aspirations;Provided career advice and guidance;Discussed your performance;Provided an example of appropriate ethical codes;Offered you training to support your skill development;Connected you to others within or outside your field;Provided expert advice;Conducted a formal appraisal	4		6	1	7	5	3	5	Somewhat important	Extremely important	Extremely important	Extremely important	Extremely successful	Somewhat successful	Extremely successful	Somewhat successful	Somewhat successful	Somewhat successful	Extremely successful	Somewhat successful	2	5	6	4	5	5	6	7	6	3	5	6	2	6	3-5 years	6
169	I am employed / contracted / freelance	NULL	NULL	Other	Academia / university	Other - Manager	No	Full-time permanent	NULL	NULL	Not applicable	41-5 hours	Not applicable						6	3	4	Extremely important	Extremely important	Somewhat important	Somewhat important	Somewhat successful	Somewhat successful	Somewhat successful	Somewhat successful	Somewhat successful	Somewhat successful	Somewhat successful	Somewhat successful	4	5	5	5	5	3	3	7	3	5	6	6	3	7	21-3 years	6
170	I am employed / contracted / freelance	NULL	NULL	Life Sciences	Academia / university	Group Leader	Yes, I manage multiple people	Freelance / self-employed	NULL	NULL	Mostly wet lab – based on experimental equipment and reagents	51-6 hours	Not applicable						4	4	4	Extremely important	Extremely important	Extremely important	Extremely important	Somewhat successful	Somewhat successful	Somewhat successful	Somewhat successful	Somewhat successful	Extremely successful	Somewhat successful	Somewhat successful	4	4	5	5	2	4	5	4	4	6	6	3	4	4	3+ years	6
171	I am a student	NULL	NULL	Life Sciences;Humanities / Social Sciences	NULL	NULL	NULL	NULL	NULL	Doctoral degree (PhD/DPhil/MD)	NULL	61-7 hours	Discussed your performance;Noted your achievements;Provided expert advice	1	6	6	1	6	3	7	7	Extremely important	Extremely important	Extremely important	Extremely important	Extremely successful	Somewhat successful	Extremely successful	Extremely successful	Somewhat successful	Somewhat successful	Extremely successful	Extremely successful	2	1	4	4	3	4	5	1	5	7	7	1	1	4	NULL	6
172	I am employed / contracted / freelance	NULL	NULL	Life Sciences	Academia / university	Research / Technical Specialist	Yes, I manage multiple people	Full-time permanent	NULL	NULL	Mostly human participants	41-5 hours	Provided career advice and guidance;Noted your achievements;Connected you to others within or outside your field;Supported you with personal issues;Supported your wellbeing;Provided expert advice;Conducted a formal appraisal						5	6	5	Extremely important	Extremely important	Extremely important	Extremely important	Somewhat successful	Somewhat successful	Extremely successful	Extremely successful	Somewhat successful	Somewhat successful	Somewhat successful	Somewhat successful	5	7	6	6	4	4	3	7	2	7	8	8	3	5	3+ years	7
173	I am employed / contracted / freelance	NULL	NULL	Humanities / Social Sciences	Academia / university	Professor	Yes, I manage multiple people	Part-time permanent	NULL	NULL	Mostly primary sources / artefacts	21-3 hours	Provided career advice and guidance;Discussed your performance;Offered you training to support your skill development;Supported you with personal issues;Provided expert advice;Conducted a formal appraisal						2	5	5	Somewhat important	Extremely important	Extremely important	Extremely important	Somewhat successful	Somewhat successful	Extremely successful	Somewhat successful	Somewhat successful	Neutral	Neutral	Neutral	2	4	6	8	5	5	5	5	4	5	5	7	6	5	3+ years	5
174	I am employed / contracted / freelance	NULL	NULL	Life Sciences	Academia / university	Lecturer / Assistant Professor	No	Full-time fixed term / contract	1-2 years	NULL	Mostly wet lab – based on experimental equipment and reagents	31-4 hours	Supported you with personal issues						2	2	2	Extremely important	Extremely important	Extremely important	Extremely important	Somewhat unsuccesful	Somewhat unsuccesful	Somewhat unsuccesful	Somewhat unsuccesful	Somewhat unsuccesful	Somewhat unsuccesful	Somewhat unsuccesful	Somewhat unsuccesful	4	3	3	3	3	4	4	4	5	4	3	5	7	6	21-3 years	5
175	I am a student	NULL	NULL	Humanities / Social Sciences	NULL	NULL	NULL	NULL	NULL	Doctoral degree (PhD/DPhil/MD)	NULL	31-4 hours	Had a conversation with you about your career aspirations;Provided career advice and guidance;Discussed your performance;Provided an example of appropriate ethical codes;Noted your achievements;Offered you training to support your skill development;Provided an example of appropriate research standards;Connected you to others within or outside your field;Supported your wellbeing;Provided expert ad…	7			1	7	4	4	4	Somewhat unimportant	Extremely important	Extremely important	Extremely important	I don't know	Extremely successful	Extremely successful	Extremely successful	I don't know	Somewhat successful	Extremely successful	Somewhat successful	6	6	6	4	4	1	1	7	3	6	6	3	3	5	NULL	6
176	I am employed / contracted / freelance	NULL	NULL	Life Sciences	Academia / university	Group Leader	Yes, I manage multiple people	Full-time fixed term / contract	3-5 years	NULL	Mostly wet lab – based on experimental equipment and reagents	31-4 hours	Conducted a formal appraisal						4	3	4	Extremely important	Extremely important	Extremely important	I don't know	Neutral	Neutral	Neutral	Somewhat unsuccesful	Neutral	Neutral	Neutral	Neutral	4	5	5	5	3	6	6	5	7	2	5	6	6	3	11-2 years	5
177	I am employed / contracted / freelance	NULL	NULL	Life Sciences;Physical Sciences	Academia / university	Reader	Yes, I manage multiple people	Full-time permanent	NULL	NULL	Mostly computational	41-5 hours	Had a conversation with you about your career aspirations;Provided career advice and guidance;Discussed your performance;Offered you training to support your skill development;Provided expert advice;Conducted a formal appraisal						5	2	2	Extremely important	Extremely important	Extremely important	Extremely important	Somewhat successful	Somewhat successful	Somewhat successful	Somewhat successful	Somewhat successful	Somewhat successful	Somewhat successful	Somewhat successful	3	7	5	4	3	5	6	5	5	5	5	5	5	6	11-2 years	6
178	I am employed / contracted / freelance	NULL	NULL	Life Sciences	Academia / university	Reader	Yes, I manage multiple people	Full-time permanent	NULL	NULL	Mostly wet lab – based on experimental equipment and reagents	41-5 hours	Had a conversation with you about your career aspirations;Noted your achievements;Offered you training to support your skill development;Conducted a formal appraisal						4	4	3	Extremely important	Extremely important	Extremely important	Extremely important	Somewhat successful	Extremely successful	Somewhat successful	Somewhat successful	Neutral	Extremely successful	Somewhat successful	Neutral	3	6	4	5	6	4	5	4	5	4	5	6	6	6	21-3 years	5
179	I am employed / contracted / freelance	NULL	NULL	Life Sciences;Physical Sciences	Academia / university	Research Support Staff	Yes, I manage 1 person	Full-time permanent	NULL	NULL	Not applicable	31-4 hours	Discussed your performance						2	2	2	Somewhat important	Extremely important	Extremely important	Extremely important	Extemely unsuccesful	Extemely unsuccesful	Somewhat unsuccesful	Somewhat unsuccesful	Somewhat unsuccesful	Somewhat unsuccesful	Somewhat unsuccesful	Somewhat unsuccesful	2	2	2	2	6	5	6	4	3	5	8	8	5	5	11-2 years	4
180	I am employed / contracted / freelance	NULL	NULL	Life Sciences	Academia / university	Independent Fellow	Yes, I manage multiple people	Full-time fixed term / contract	1-2 years	NULL	Mostly wet lab – based on experimental equipment and reagents	41-5 hours	Had a conversation with you about your career aspirations;Provided career advice and guidance;Discussed your performance;Noted your achievements;Connected you to others within or outside your field;Provided expert advice						3	5	7	Neutral	Neutral	Extremely important	Extremely important	Somewhat successful	Neutral	Extremely successful	Extremely successful	Neutral	Somewhat successful	Somewhat successful	Somewhat unsuccesful	7	7	7	7	4	4	4	6	4	5	7	4	4	7	21-3 years	7
181	I am employed / contracted / freelance	NULL	NULL	Life Sciences	Academia / university	Group Leader	Yes, I manage multiple people	Full-time fixed term / contract	3-5 years	NULL	Mostly wet lab – based on experimental equipment and reagents	41-5 hours	Had a conversation with you about your career aspirations;Provided career advice and guidance;Discussed your performance;Provided an example of appropriate ethical codes;Noted your achievements;Offered you training to support your skill development;Connected you to others within or outside your field;Supported you with personal issues;Supported your wellbeing;Provided expert advice;Conducted a fo…						6	5	6	Extremely important	Extremely important	Extremely important	Somewhat important	Somewhat successful	Extremely successful	Extremely successful	Somewhat successful	Somewhat successful	Extremely successful	Extremely successful	Somewhat successful	6	5	7	5	2	3	3	6	2	7	7	6	5	6	11-2 years	7
182	I am employed / contracted / freelance	NULL	NULL	Life Sciences	Academia / university	Research Technician / Officer	No	Full-time fixed term / contract	1-2 years	NULL	Mostly wet lab – based on experimental equipment and reagents	31-4 hours	Had a conversation with you about your career aspirations;Provided career advice and guidance;Discussed your performance;Offered you training to support your skill development;Supported you with personal issues;Provided expert advice;Conducted a formal appraisal						1	5	5	Extremely important	Somewhat important	Extremely important	Extremely important	Extremely successful	Somewhat successful	Somewhat successful	Extremely successful	Neutral	Somewhat successful	Neutral	Neutral	7	7	7	5	2	2	2	6	4	4	5	4	2	8	1-2 years	5
183	I used to be part of the research community, but no longer am	For career progression / development;It was impacting on my wellbeing and mental health;Bullying and harassment	3-5 years ago	Life Sciences	NULL	NULL	NULL	NULL	NULL	NULL	NULL	NULL	NULL									Somewhat important	Somewhat important	Extremely important	Extremely important	NULL	NULL	NULL	NULL	NULL	NULL	NULL	NULL	6	4	3	6	4	5	5	4	8	5	5	4	8	8	NULL	5
184	I am employed / contracted / freelance	NULL	NULL	Life Sciences	Academia / university	Professor	Yes, I manage multiple people	Full-time permanent	NULL	NULL	Mostly wet lab – based on experimental equipment and reagents	41-5 hours	Discussed your performance;Conducted a formal appraisal						1	5	3	Somewhat unimportant	Somewhat important	Extremely important	Somewhat important	Neutral	Somewhat successful	Neutral	Somewhat successful	Somewhat unsuccesful	Neutral	Somewhat unsuccesful	Somewhat successful	4	7	4	1	1	1	7	2	6	3	6	5	2	7	3+ years	6
185	I am employed / contracted / freelance	NULL	NULL	Life Sciences	Academia / university	Professor	Yes, I manage multiple people	Full-time permanent	NULL	NULL	Mostly computational	51-6 hours	Had a conversation with you about your career aspirations;Discussed your performance;Noted your achievements;Conducted a formal appraisal						4	4	4	Not important at all	Extremely important	Extremely important	Extremely important	Extremely successful	Extremely successful	Extremely successful	Somewhat successful	Extemely unsuccesful	Somewhat successful	Somewhat unsuccesful	Extemely unsuccesful	4	1	7	4	7	1	4	7	7	4	4	4	4	5	21-3 years	1
186	I am employed / contracted / freelance	NULL	NULL	Life Sciences	SME / start-up company	Research / Technical Specialist	No	Freelance / self-employed	NULL	NULL	In the field	41-5 hours	Not applicable						8	8	4	Extremely important	Extremely important	Extremely important	Extremely important	Somewhat successful	Extremely successful	Somewhat successful	Neutral	N/A	N/A	N/A	N/A	5	3	5	6	8	5	8	8	8	8	8	8	8	8	6-1 years	4
187	I am employed / contracted / freelance	NULL	NULL	Life Sciences	Academia / university	Postdoc / Research Associate	Yes, I manage 1 person	Full-time fixed term / contract	Less than 1 year	NULL	Mostly wet lab – based on experimental equipment and reagents	31-4 hours	Had a conversation with you about your career aspirations;Discussed your performance;Provided an example of appropriate ethical codes;Noted your achievements;Offered you training to support your skill development;Provided an example of appropriate research standards;Provided expert advice;Conducted a formal appraisal	5	7	5	1	7	3	5	3	Extremely important	Extremely important	Extremely important	Extremely important	Somewhat successful	Somewhat successful	Extremely successful	Extemely unsuccesful	Somewhat successful	Somewhat successful	Extremely successful	Extemely unsuccesful	6	6	5	3	1	2	4	5	4	6	7	4	5	6	6-1 years	3
188	I am employed / contracted / freelance	NULL	NULL	Life Sciences;Physical Sciences	SME / start-up company	Professor	Yes, I manage multiple people	Full-time permanent	NULL	NULL	Other - a mixture of above	More than 8 hours	Not applicable						7	7	7	Extremely important	Extremely important	Extremely important	Extremely important	Extremely successful	Extremely successful	Extremely successful	Extremely successful	Extremely successful	Extremely successful	Extremely successful	Extremely successful	5	7	7	7	1	1	1	7	1	7	7	4	1	7	11-2 years	4
189	I am employed / contracted / freelance	NULL	NULL	Humanities / Social Sciences	Other	Other - Researcher	Yes, I manage multiple people	Part-time fixed term / contract	Other	NULL	Mostly human participants	31-4 hours	Not applicable						8	8	8	Somewhat important	Extremely important	Extremely important	Extremely important	Extremely successful	Extremely successful	Extremely successful	Extremely successful	N/A	N/A	N/A	N/A	8	8	8	8	8	8	8	8	8	8	8	8	8	8	21-3 years	3
190	I am employed / contracted / freelance	NULL	NULL	Life Sciences;Physical Sciences	Academia / university	Group Leader	Yes, I manage multiple people	Full-time fixed term / contract	5+ years	NULL	Mostly wet lab – based on experimental equipment and reagents	41-5 hours	Had a conversation with you about your career aspirations;Provided career advice and guidance;Discussed your performance;Noted your achievements;Connected you to others within or outside your field;Conducted a formal appraisal						4	7	6	Extremely important	Extremely important	Extremely important	Somewhat important	Extremely successful	Somewhat successful	Extremely successful	Extremely successful	Somewhat successful	Somewhat successful	Extremely successful	Extremely successful	7	7	7	7	4	1	4	6	5	7	7	2	1	7	11-2 years	7
191	I am employed / contracted / freelance	NULL	NULL	Humanities / Social Sciences	Academia / university	Postdoc / Research Associate	No	Full-time fixed term / contract	3-5 years	NULL	In the field	61-7 hours	Had a conversation with you about your career aspirations;Provided career advice and guidance;Discussed your performance;Provided an example of appropriate ethical codes;Noted your achievements;Offered you training to support your skill development;Connected you to others within or outside your field;Supported you with personal issues;Supported your wellbeing;Provided expert advice;Conducted a fo…	6	7	4	1	7	4	4	1	Somewhat important	Extremely important	Extremely important	Extremely important	Somewhat successful	Somewhat successful	Neutral	Somewhat successful	Somewhat successful	Neutral	Extemely unsuccesful	Somewhat successful	3	5	6	6	6	7	7	5	7	4	5	4	5	5	3-5 years	5
192	I am employed / contracted / freelance	NULL	NULL	Life Sciences	Academia / university	Postdoc / Research Associate	No	Full-time fixed term / contract	3-5 years	NULL	Mostly wet lab – based on experimental equipment and reagents	41-5 hours	Had a conversation with you about your career aspirations;Provided career advice and guidance;Discussed your performance;Provided an example of appropriate ethical codes;Noted your achievements;Provided an example of appropriate research standards;Supported you with personal issues;Supported your wellbeing;Provided expert advice;Conducted a formal appraisal;Requested your feedback on their manage…	7	7	7	1	7	4	5	4	Extremely important	Extremely important	Extremely important	Extremely important	Extremely successful	Somewhat successful	Extremely successful	Neutral	N/A	Neutral	Neutral	Neutral	4	5	5	4	1	4	5	4	5	4	4	2	4	5	6-1 years	5
193	I am employed / contracted / freelance	NULL	NULL	Humanities / Social Sciences	Academia / university	Postdoc / Research Associate	Yes, I manage 1 person	Full-time fixed term / contract	3-5 years	NULL	Mostly human participants	61-7 hours	Provided career advice and guidance;Provided expert advice	3	1	2	2	7	7	1	1	Extremely important	Extremely important	Extremely important	Extremely important	Extemely unsuccesful	Neutral	Somewhat unsuccesful	Extemely unsuccesful	Extemely unsuccesful	Extemely unsuccesful	Extemely unsuccesful	Extemely unsuccesful	1	1	1	6	1	6	7	2	7	1	2	7	7	7	11-2 years	2
194	I am employed / contracted / freelance	NULL	NULL	Life Sciences	Academia / university	Research / Technical Specialist	No	Full-time permanent	NULL	NULL	Mostly wet lab – based on experimental equipment and reagents	31-4 hours	Noted your achievements						1	1	6	Extremely important	Somewhat important	Extremely important	Somewhat important	N/A	N/A	Extremely successful	N/A	I don't know	I don't know	Somewhat successful	Somewhat successful	6	7	6	3	1	4	4	7	2	6	7	2	6	8	21-3 years	3
195	I am employed / contracted / freelance	NULL	NULL	Life Sciences	Academia / university	Research / Technical Specialist	Yes, I manage multiple people	Full-time permanent	NULL	NULL	Mostly computational	31-4 hours	Noted your achievements;Conducted a formal appraisal;Requested your feedback on their management of you						2	2	4	Somewhat important	Extremely important	Somewhat important	Somewhat important	Somewhat successful	Somewhat successful	Neutral	Extemely unsuccesful	Somewhat successful	Neutral	Neutral	Somewhat unsuccesful	5	4	4	4	6	6	6	2	6	3	3	5	3	5	11-2 years	2
197	I am employed / contracted / freelance	NULL	NULL	Life Sciences	Academia / university	Professor	Yes, I manage multiple people	Full-time permanent	NULL	NULL	Mostly computational	51-6 hours	Not applicable						6	2	6	Extremely important	Extremely important	Extremely important	Extremely important	Extremely successful	Somewhat successful	Somewhat successful	Somewhat successful	Extremely successful	Somewhat successful	Extremely successful	Somewhat successful	5	6	6	7	4	2	4	7	1	7	7	3	2	7	3+ years	7
198	I am employed / contracted / freelance	NULL	NULL	Life Sciences;Humanities / Social Sciences	Academia / university	Postdoc / Research Associate	Yes, I manage multiple people	Full-time permanent	NULL	NULL	Mostly human participants	51-6 hours	Had a conversation with you about your career aspirations;Provided career advice and guidance;Provided an example of appropriate ethical codes;Provided an example of appropriate research standards;Provided expert advice	3	6	5	2	6	4	3	3	Extremely important	Extremely important	Extremely important	Extremely important	Somewhat successful	Neutral	Somewhat successful	Somewhat successful	Extremely successful	Somewhat successful	Extremely successful	Extremely successful	4	5	5	6	5	3	4	7	4	6	6	5	4	3	6-1 years	5
199	I used to be part of the research community, but no longer am	I wanted to apply my skills elsewhere;Personal reasons	3-5 years ago	Life Sciences;Physical Sciences	NULL	NULL	NULL	NULL	NULL	NULL	NULL	NULL	NULL									Extremely important	Extremely important	Extremely important	Extremely important	NULL	NULL	NULL	NULL	NULL	NULL	NULL	NULL	4	7	6	6	4	6	5	4	5	5	5	4	4	4	NULL	4
200	I am employed / contracted / freelance	NULL	NULL	Life Sciences	Academia / university	Professor	Yes, I manage 1 person	Part-time fixed term / contract	3-5 years	NULL	Mostly wet lab – based on experimental equipment and reagents	31-4 hours	Conducted a formal appraisal						6	5	6	Somewhat important	Extremely important	Extremely important	Somewhat important	Somewhat successful	Somewhat successful	Extremely successful	Neutral	Neutral	Neutral	Extremely successful	Neutral	6	7	7	6	2	2	6	7	3	7	6	8	5	6	3+ years	5
201	I am employed / contracted / freelance	NULL	NULL	Life Sciences	Academia / university	Director	Yes, I manage multiple people	Full-time permanent	NULL	NULL	Mostly wet lab – based on experimental equipment and reagents	51-6 hours	Discussed your performance;Noted your achievements;Conducted a formal appraisal						5	5	5	Somewhat important	Extremely important	Extremely important	Extremely important	Somewhat successful	Extremely successful	Extremely successful	Somewhat successful	Somewhat unsuccesful	Neutral	Neutral	Neutral	3	5	4	4	5	4	5	7	6	4	5	2	4	7	11-2 years	4
202	I used to be part of the research community, but no longer am	I wanted to apply my skills elsewhere;Too difficult to find a job / insecure career path;For a better work-life balance;It was impacting on my wellbeing and mental health	5+ years ago	NULL	NULL	NULL	NULL	NULL	NULL	NULL	NULL	NULL	NULL									NULL	NULL	NULL	NULL	NULL	NULL	NULL	NULL	NULL	NULL	NULL	NULL															NULL
203	I am employed / contracted / freelance	NULL	NULL	Life Sciences	Academia / university	Postdoc / Research Associate	No	Full-time fixed term / contract	3-5 years	NULL	Mostly wet lab – based on experimental equipment and reagents	41-5 hours	Had a conversation with you about your career aspirations;Provided career advice and guidance;Discussed your performance;Noted your achievements;Offered you training to support your skill development;Provided an example of appropriate research standards;Connected you to others within or outside your field;Supported you with personal issues;Provided expert advice;Conducted a formal appraisal	6	7	7	2	7	4	4	2	Extremely important	Extremely important	Extremely important	Extremely important	Somewhat successful	Neutral	Somewhat successful	Neutral	I don't know	I don't know	I don't know	I don't know	4	6	6	4	1	4	4	5	4	2	6	2	2	8	3-5 years	6
204	I am employed / contracted / freelance	NULL	NULL	Life Sciences	Academia / university	Group Leader	Yes, I manage multiple people	Full-time permanent	NULL	NULL	Mostly wet lab – based on experimental equipment and reagents	71-8 hours	Provided career advice and guidance;Discussed your performance;Provided an example of appropriate ethical codes;Noted your achievements;Provided an example of appropriate research standards;Connected you to others within or outside your field;Provided expert advice;Conducted a formal appraisal						7	6	6	Extremely important	Extremely important	Extremely important	Extremely important	Extremely successful	Extremely successful	Extremely successful	Extremely successful	Somewhat successful	Somewhat successful	Extremely successful	Somewhat successful	7	7	7	7	5	5	4	7	5	7	7	6	6	6	11-2 years	6
205	I am employed / contracted / freelance	NULL	NULL	Humanities / Social Sciences	Academia / university	Professor	Yes, I manage multiple people	Full-time permanent	NULL	NULL	Mostly human participants	41-5 hours	Had a conversation with you about your career aspirations;Noted your achievements;Provided expert advice;Conducted a formal appraisal						6	6	6	Somewhat important	Somewhat important	Extremely important	Extremely important	Somewhat successful	Extremely successful	Extremely successful	Extremely successful	Somewhat successful	Extremely successful	Extremely successful	Somewhat successful	6	7	6	5	5	5	3	5	3	5	6	4	3	5	21-3 years	6
206	I am employed / contracted / freelance	NULL	NULL	Humanities / Social Sciences	Academia / university	Professor	Yes, I manage multiple people	Full-time permanent	NULL	NULL	Mostly primary sources / artefacts	31-4 hours	Had a conversation with you about your career aspirations;Provided career advice and guidance;Discussed your performance;Noted your achievements;Offered you training to support your skill development;Supported you with personal issues;Provided expert advice;Conducted a formal appraisal						5	7	5	Somewhat important	Extremely important	Somewhat important	Extremely important	Somewhat successful	Somewhat successful	Somewhat successful	Extremely successful	Somewhat successful	Somewhat successful	Somewhat successful	Extremely successful	7	6	3	5	6	3	4	6	3	6	6	3	3	7	11-2 years	6
207	I am employed / contracted / freelance	NULL	NULL	Life Sciences	Academia / university	Independent Fellow	Yes, I manage multiple people	Full-time permanent	NULL	NULL	Mostly computational	41-5 hours	Discussed your performance;Conducted a formal appraisal						5	1	6	Somewhat important	I don't know	Extremely important	Neutral	I don't know	I don't know	Neutral	Neutral	Somewhat unsuccesful	I don't know	Somewhat successful	Neutral	8	5	8	7	3	3	5	5	7	7	7	8	4	2	11-2 years	7
208	I am employed / contracted / freelance	NULL	NULL	Humanities / Social Sciences	Academia / university	Senior Lecturer / Associate Professor	Yes, I manage multiple people	Full-time permanent	NULL	NULL	Mostly human participants	71-8 hours	Provided career advice and guidance;Discussed your performance;Conducted a formal appraisal						4	4	6	Extremely important	Extremely important	Somewhat important	Somewhat unimportant	Somewhat unsuccesful	Somewhat unsuccesful	Extemely unsuccesful	Extemely unsuccesful	Extemely unsuccesful	Extemely unsuccesful	Extemely unsuccesful	Extemely unsuccesful	6	2	1	3	6	1	7	2	1	2	6	7	7	4	11-2 years	7
209	I am employed / contracted / freelance	NULL	NULL	Humanities / Social Sciences	Academia / university	Senior Lecturer / Associate Professor	No	Full-time permanent	NULL	NULL	Mostly primary sources / artefacts	51-6 hours	Had a conversation with you about your career aspirations;Discussed your performance;Noted your achievements;Provided an example of appropriate research standards;Connected you to others within or outside your field;Supported you with personal issues;Supported your wellbeing;Provided expert advice;Requested your feedback on their management of you						1	3	4	Extremely important	Extremely important	Somewhat important	Somewhat important	Somewhat unsuccesful	Somewhat successful	Somewhat successful	Somewhat unsuccesful	Extemely unsuccesful	Somewhat successful	Somewhat successful	Somewhat unsuccesful	2	5	3	5	6	7	3	5	6	3	1	7	7	6	11-2 years	6
210	I am employed / contracted / freelance	NULL	NULL	Life Sciences	Academia / university	Professor	Yes, I manage multiple people	Full-time permanent	NULL	NULL	Mostly wet lab – based on experimental equipment and reagents	61-7 hours	Not applicable						7	5	5	Extremely important	Extremely important	Extremely important	Extremely important	Somewhat successful	Neutral	Extremely successful	Extremely successful	Somewhat successful	Neutral	Extremely successful	Somewhat successful	6	6	6	6	2	4	4	7	5	6	7	6	6	6	3+ years	6
211	I am employed / contracted / freelance	NULL	NULL	Physical Sciences	Academia / university	Senior Lecturer / Associate Professor	No	Full-time permanent	NULL	NULL	Mostly computational	41-5 hours	Had a conversation with you about your career aspirations;Discussed your performance;Noted your achievements;Supported your wellbeing;Conducted a formal appraisal;Requested your feedback on their management of you						5	5	3	Somewhat important	Extremely important	Somewhat important	Extremely important	Somewhat unsuccesful	Somewhat successful	Neutral	Neutral	Neutral	Neutral	Somewhat unsuccesful	Neutral	4	6	4	4	5	4	6	4	6	4	5	5	5	5	21-3 years	3
212	I am employed / contracted / freelance	NULL	NULL	Life Sciences	Academia / university	Professor	Yes, I manage multiple people	Full-time permanent	NULL	NULL	Mostly wet lab – based on experimental equipment and reagents	61-7 hours	Discussed your performance;Noted your achievements;Conducted a formal appraisal						5	5	3	Extremely important	Extremely important	Extremely important	Extremely important	Somewhat successful	Somewhat successful	Somewhat successful	Somewhat successful	Somewhat unsuccesful	Somewhat successful	Somewhat successful	Somewhat successful	4	5	6	2	2	1	3	7	6	7	5	8	4	6	3+ years	6
213	I am employed / contracted / freelance	NULL	NULL	Humanities / Social Sciences	Academia / university	Reader	Yes, I manage multiple people	Full-time permanent	NULL	NULL	Mostly human participants	31-4 hours	Had a conversation with you about your career aspirations;Provided career advice and guidance;Discussed your performance;Noted your achievements;Supported you with personal issues;Supported your wellbeing;Provided expert advice;Conducted a formal appraisal						4	4	3	Somewhat important	Extremely important	Extremely important	Somewhat important	N/A	N/A	N/A	N/A	Somewhat unsuccesful	Somewhat unsuccesful	Somewhat unsuccesful	Somewhat unsuccesful	3	4	4	7	5	3	7	5	3	4	3	7	4	4	11-2 years	5
214	I am employed / contracted / freelance	NULL	NULL	Other	Not-for-profit research institute (including charity funded, research council funded etc)	Director	Yes, I manage multiple people	Freelance / self-employed	NULL	NULL	Mostly human participants	11-2 hours	Not applicable						4	3	5	Neutral	Extremely important	Extremely important	Extremely important	Somewhat successful	Somewhat successful	Somewhat successful	Somewhat successful	Extremely successful	Extremely successful	Somewhat successful	Somewhat successful	3	5	5	3	4	3	4	3	2	6	8	5	2	3	3-5 years	5
215	I am employed / contracted / freelance	NULL	NULL	Life Sciences	Academia / university	Professor	Yes, I manage multiple people	Full-time permanent	NULL	NULL	Mostly wet lab – based on experimental equipment and reagents	41-5 hours	Had a conversation with you about your career aspirations;Provided career advice and guidance;Discussed your performance;Provided an example of appropriate ethical codes;Noted your achievements;Provided an example of appropriate research standards;Supported your wellbeing;Provided expert advice;Conducted a formal appraisal;Requested your feedback on their management of you						7	7	7	Extremely important	Extremely important	Extremely important	Extremely important	Extremely successful	Somewhat successful	Extremely successful	Extremely successful	I don't know	I don't know	I don't know	I don't know	6	6	7	6	2	1	1	7	1	7	7	1	1	6	1-2 years	6
216	I am employed / contracted / freelance	NULL	NULL	Life Sciences	Academia / university	Reader	Yes, I manage multiple people	Full-time permanent	NULL	NULL	Mostly wet lab – based on experimental equipment and reagents	31-4 hours	Had a conversation with you about your career aspirations;Discussed your performance;Conducted a formal appraisal						7	6	6	Somewhat important	Extremely important	Extremely important	Extremely important	Somewhat successful	Somewhat successful	Somewhat successful	Somewhat successful	Somewhat successful	Somewhat successful	Somewhat successful	Somewhat successful	6	7	7	6	6	4	6	7	2	6	7	3	2	6	3+ years	7
217	I am a student;I am employed / contracted / freelance	NULL	NULL	Life Sciences	Academia / university	Training Fellow	Yes, I manage multiple people	Full-time fixed term / contract	3-5 years	Doctoral degree (PhD/DPhil/MD)	Mostly computational	More than 8 hours	Provided career advice and guidance;Supported your wellbeing;Provided expert advice;Conducted a formal appraisal	4	7	4	4	7	1	1	1	Extremely important	Extremely important	Extremely important	Extremely important	Somewhat successful	Somewhat successful	Somewhat successful	Somewhat successful	Extemely unsuccesful	Extemely unsuccesful	Extemely unsuccesful	Extemely unsuccesful	1	1	5	1	7	6	7	3	7	1	1	5	7	5	3-5 years	1
218	I am employed / contracted / freelance	NULL	NULL	Life Sciences	Healthcare setting (hospital, community-based etc)	Training Fellow	No	Full-time fixed term / contract	5+ years	NULL	Mostly human participants	41-5 hours	Discussed your performance	3	2	1	7	1	4	4	4	Somewhat important	Somewhat important	Extremely important	Extremely important	Somewhat successful	Somewhat successful	Somewhat unsuccesful	Somewhat successful	Somewhat successful	Somewhat successful	Somewhat successful	Somewhat successful	5	1	1	5	5	7	6	3	4	3	3	3	3	4	3-5 years	5
219	I am employed / contracted / freelance	NULL	NULL	Life Sciences	Academia / university	Postdoc / Research Associate	No	Full-time permanent	NULL	NULL	Mostly wet lab – based on experimental equipment and reagents	51-6 hours	Had a conversation with you about your career aspirations;Provided career advice and guidance;Noted your achievements;Provided an example of appropriate research standards;Connected you to others within or outside your field;Provided expert advice	6	6	6	1	6	6	6	6	Extremely important	Extremely important	Extremely important	Extremely important	I don't know	Extremely successful	Extremely successful	I don't know	I don't know	I don't know	I don't know	I don't know	6	7	6	5	2	2	8	6	8	8	6	2	3	8	6-1 years	5
220	I am employed / contracted / freelance	NULL	NULL	Life Sciences;Humanities / Social Sciences	Academia / university	Professor	Yes, I manage multiple people	Full-time permanent	NULL	NULL	Mostly human participants	71-8 hours	Discussed your performance						2	1	1	Extremely important	Somewhat important	Extremely important	Somewhat important	Extemely unsuccesful	Extemely unsuccesful	Extemely unsuccesful	Extemely unsuccesful	Extemely unsuccesful	Extemely unsuccesful	Extemely unsuccesful	Extemely unsuccesful	4	2	1	3	7	7	6	5	7	1	3	2	3	3	11-2 years	6
221	I am employed / contracted / freelance	NULL	NULL	Life Sciences	Academia / university	Professor	Yes, I manage multiple people	Full-time permanent	NULL	NULL	Mostly wet lab – based on experimental equipment and reagents	41-5 hours	None of the above						2	3	2	Extremely important	Somewhat important	Somewhat important	Extremely important	Somewhat successful	Somewhat successful	Somewhat successful	Somewhat successful	Neutral	Neutral	Neutral	Neutral	4	5	5	4	4	2	3	6	4	1	3	3	3	4	3+ years	3
222	I am employed / contracted / freelance	NULL	NULL	Life Sciences	Academia / university	Head of Department	Yes, I manage multiple people	Full-time permanent	NULL	NULL	Mostly wet lab – based on experimental equipment and reagents	51-6 hours	None of the above						3	2	5	Somewhat important	Somewhat important	Somewhat important	Neutral	Somewhat successful	Somewhat successful	Somewhat successful	Neutral	Somewhat unsuccesful	Neutral	Somewhat successful	Somewhat unsuccesful	5	3	4	4	4	2	5	2	5	3	3	6	5	5	21-3 years	5
223	I am employed / contracted / freelance	NULL	NULL	Life Sciences	Academia / university	Professor	Yes, I manage multiple people	Full-time permanent	NULL	NULL	Mostly wet lab – based on experimental equipment and reagents	More than 8 hours	None of the above						4	3	4	Extremely important	Extremely important	Extremely important	Extremely important	Extremely successful	Extremely successful	Extremely successful	Somewhat successful	Somewhat successful	Somewhat successful	Neutral	Somewhat successful	4	5	4	4	4	4	2	6	3	6	5	3	3	5	21-3 years	3
224	I used to be part of the research community, but no longer am	I wanted to apply my skills elsewhere	3-5 years ago	Life Sciences	NULL	NULL	NULL	NULL	NULL	NULL	NULL	NULL	NULL									Extremely important	Somewhat important	Extremely important	Extremely important	NULL	NULL	NULL	NULL	NULL	NULL	NULL	NULL	2	5	4	4	2	6	7	5	5	4	6	2	2	4	NULL	4
225	I am employed / contracted / freelance	NULL	NULL	Life Sciences	Academia / university	Group Leader	Yes, I manage multiple people	Full-time fixed term / contract	3-5 years	NULL	Mostly wet lab – based on experimental equipment and reagents	51-6 hours	Had a conversation with you about your career aspirations;Provided career advice and guidance;Noted your achievements;Conducted a formal appraisal						6	5	5	Extremely important	Extremely important	Extremely important	Extremely important	Somewhat successful	Somewhat successful	Extremely successful	Somewhat successful	Somewhat successful	Somewhat successful	Somewhat successful	Somewhat successful	3	4	5	5	4	5	5	4	4	5	5	5	4	5	11-2 years	4
226	I am employed / contracted / freelance	NULL	NULL	Other	Academia / university	Research Support Staff	Yes, I manage multiple people	Full-time permanent	NULL	NULL	Other - a mixture of above	31-4 hours	Had a conversation with you about your career aspirations;Provided career advice and guidance;Discussed your performance;Offered you training to support your skill development;Supported you with personal issues;Supported your wellbeing;Provided expert advice;Conducted a formal appraisal;Discussed alternative career options						5	3	3	Somewhat important	Extremely important	Extremely important	Extremely important	Somewhat successful	Somewhat successful	Somewhat unsuccesful	Somewhat successful	Somewhat successful	Somewhat successful	Somewhat unsuccesful	Somewhat successful	6	5	5	3	6	6	7	2	7	5	3	4	3	7	3-5 years	5
227	I am employed / contracted / freelance	NULL	NULL	Life Sciences	Academia / university	Group Leader	Yes, I manage multiple people	Full-time permanent	NULL	NULL	Mostly wet lab – based on experimental equipment and reagents	41-5 hours	Discussed your performance;Conducted a formal appraisal						3	6	5	Extremely important	Extremely important	Extremely important	Extremely important	N/A	N/A	N/A	N/A	Neutral	Somewhat successful	Extremely successful	Somewhat unsuccesful	7	7	7	3	6	8	2	7	5	6	5	5	3	8	3+ years	7
228	I am employed / contracted / freelance	NULL	NULL	Life Sciences	Healthcare setting (hospital, community-based etc)	Training Fellow	No	Full-time permanent	NULL	NULL	Mostly human participants	61-7 hours	Offered you training to support your skill development;Connected you to others within or outside your field;Provided expert advice	6	6	5	1	6	4	4	4	Somewhat important	Somewhat important	Somewhat unimportant	Somewhat important	Somewhat unsuccesful	Somewhat successful	Extemely unsuccesful	Neutral	Somewhat unsuccesful	Neutral	Somewhat successful	Somewhat successful	5	5	5	5	5	5	5	5	5	5	5	5	5	5	1-2 years	5
229	I am employed / contracted / freelance	NULL	NULL	Life Sciences	Academia / university	Professor	Yes, I manage multiple people	Full-time permanent	NULL	NULL	Mostly wet lab – based on experimental equipment and reagents	61-7 hours	Conducted a formal appraisal						3	5	5	Extremely important	Extremely important	Extremely important	Extremely important	Somewhat successful	Somewhat successful	Somewhat successful	Somewhat successful	Somewhat successful	Somewhat successful	Somewhat successful	Somewhat successful	4	5	4	4	7	2	2	5	5	6	5	6	6	3	11-2 years	5
230	I am employed / contracted / freelance	NULL	NULL	Life Sciences	Academia / university	Dean	Yes, I manage 1 person	Full-time permanent	NULL	NULL	Mostly human participants	51-6 hours	Had a conversation with you about your career aspirations;Provided career advice and guidance;Discussed your performance;Noted your achievements;Offered you training to support your skill development;Connected you to others within or outside your field;Supported you with personal issues;Supported your wellbeing;Provided expert advice;Conducted a formal appraisal						6	6	6	Extremely important	Extremely important	Extremely important	Extremely important	Extremely successful	Extremely successful	Extremely successful	Extremely successful	Extremely successful	Extremely successful	Extremely successful	Somewhat successful	5	5	5	5	3	3	2	6	2	6	6	6	2	5	3+ years	6
231	I am employed / contracted / freelance	NULL	NULL	Life Sciences	Academia / university	Professor	Yes, I manage multiple people	Full-time permanent	NULL	NULL	Mostly computational	51-6 hours	Discussed your performance;Conducted a formal appraisal						5	6	5	Extremely important	Extremely important	Extremely important	Extremely important	Somewhat successful	Extremely successful	Somewhat successful	Extremely successful	Somewhat successful	Somewhat successful	Somewhat successful	Somewhat successful	5	5	6	5	3	2	4	6	2	6	4	5	4	5	3+ years	6
232	I am a student	NULL	NULL	Life Sciences	NULL	NULL	NULL	NULL	NULL	Doctoral degree (PhD/DPhil/MD)	NULL	51-6 hours	Discussed your performance;Supported your wellbeing	3	5	5	1	7	3	3	1	Extremely important	Extremely important	Extremely important	Somewhat important	Somewhat successful	Neutral	Somewhat successful	Somewhat unsuccesful	Somewhat successful	Somewhat successful	Neutral	Neutral	2	3	5	4	3	2	5	4	5	3	2	3	3	5	NULL	2
233	I am employed / contracted / freelance	NULL	NULL	Life Sciences;Physical Sciences	Academia / university	Group Leader	Yes, I manage multiple people	Full-time fixed term / contract	3-5 years	NULL	Mostly computational	41-5 hours	None of the above						4	4	4	Extremely important	Extremely important	Extremely important	Extremely important	Extremely successful	Extremely successful	Extremely successful	Somewhat successful	Neutral	Neutral	Neutral	Somewhat unsuccesful	6	6	6	6	2	2	3	4	4	3	5	2	1	5	6-1 years	6
234	I am employed / contracted / freelance	NULL	NULL	Life Sciences	Academia / university	Professor	Yes, I manage multiple people	Full-time permanent	NULL	NULL	Mostly wet lab – based on experimental equipment and reagents	31-4 hours	Provided career advice and guidance;Discussed your performance;Noted your achievements;Conducted a formal appraisal						5	4	5	Somewhat important	Extremely important	Extremely important	Somewhat important	Somewhat successful	Somewhat successful	Somewhat successful	Neutral	Somewhat successful	Somewhat successful	Somewhat successful	Neutral	6	5	6	4	3	4	5	4	4	6	5	3	3	5	21-3 years	5
235	I am employed / contracted / freelance	NULL	NULL	Life Sciences	Healthcare setting (hospital, community-based etc)	Postdoc / Research Associate	No	Full-time permanent	NULL	NULL	Mostly wet lab – based on experimental equipment and reagents	51-6 hours	Discussed your performance;Offered you training to support your skill development;Connected you to others within or outside your field	6	5	4	1	5	3	5	4	Extremely important	Extremely important	Extremely important	Extremely important	Extremely successful	Neutral	Extremely successful	Extemely unsuccesful	Extremely successful	Somewhat unsuccesful	Somewhat successful	Extemely unsuccesful	2	4	2	2	2	4	4	5	3	7	5	2	2	7	6-1 years	2
236	I used to be part of the research community, but no longer am	It was impacting on my wellbeing and mental health	5+ years ago	NULL	NULL	NULL	NULL	NULL	NULL	NULL	NULL	NULL	NULL									NULL	NULL	NULL	NULL	NULL	NULL	NULL	NULL	NULL	NULL	NULL	NULL															NULL
237	I am employed / contracted / freelance	NULL	NULL	Life Sciences	Academia / university	Group Leader	Yes, I manage multiple people	Full-time fixed term / contract	3-5 years	NULL	Mostly wet lab – based on experimental equipment and reagents	51-6 hours	Had a conversation with you about your career aspirations;Provided career advice and guidance;Discussed your performance;Noted your achievements;Offered you training to support your skill development;Provided an example of appropriate research standards;Connected you to others within or outside your field;Supported you with personal issues;Supported your wellbeing;Provided expert advice;Conducted…						7	6	6	Extremely important	Somewhat important	Somewhat important	Extremely important	Somewhat successful	Somewhat successful	Somewhat successful	Somewhat successful	Extremely successful	Somewhat successful	Extremely successful	Somewhat successful	6	6	7	5	3	1	3	6	4	6	7	2	2	6	11-2 years	5
238	I used to be part of the research community, but no longer am	I wanted to apply my skills elsewhere;Too difficult to obtain funding;It was impacting on my wellbeing and mental health;Bullying and harassment;Discrimination	3-5 years ago	Life Sciences;Physical Sciences	NULL	NULL	NULL	NULL	NULL	NULL	NULL	NULL	NULL									Somewhat unimportant	Extremely important	Extremely important	Extremely important	NULL	NULL	NULL	NULL	NULL	NULL	NULL	NULL	8	8	8	8	8	8	8	8	8	1	8	7	7	1	NULL	2
239	I am employed / contracted / freelance	NULL	NULL	Humanities / Social Sciences	Academia / university	Lecturer / Assistant Professor	Yes, I manage 1 person	Full-time fixed term / contract	3-5 years	NULL	Mostly human participants	51-6 hours	Had a conversation with you about your career aspirations;Provided career advice and guidance;Discussed your performance;Noted your achievements;Conducted a formal appraisal						4	5	3	Somewhat important	Extremely important	Extremely important	Extremely important	Somewhat unsuccesful	Somewhat unsuccesful	Somewhat unsuccesful	Neutral	Neutral	Neutral	Somewhat unsuccesful	Somewhat unsuccesful	4	5	5	3	6	6	7	5	7	2	4	4	4	5	11-2 years	6
240	I am a student	NULL	NULL	Life Sciences	NULL	NULL	NULL	NULL	NULL	Doctoral degree (PhD/DPhil/MD)	NULL	51-6 hours	Provided career advice and guidance;Noted your achievements;Connected you to others within or outside your field;Provided expert advice	5	2	5	1	7	2	1	1	Extremely important	Extremely important	Extremely important	Extremely important	Extemely unsuccesful	Neutral	Somewhat unsuccesful	Somewhat successful	I don't know	I don't know	I don't know	Somewhat successful	1	1	5	1	7	7	7	3	4	5	2	5	8	5	NULL	3
241	I am employed / contracted / freelance	NULL	NULL	Life Sciences	Not-for-profit research institute (including charity funded, research council funded etc)	Research Support Staff	Yes, I manage multiple people	Full-time permanent	NULL	NULL	Not applicable	41-5 hours	Discussed your performance;Provided an example of appropriate ethical codes;Noted your achievements;Offered you training to support your skill development;Provided an example of appropriate research standards;Connected you to others within or outside your field;Supported your wellbeing;Provided expert advice;Conducted a formal appraisal						5	3	7	Extremely important	Extremely important	Extremely important	Extremely important	Somewhat successful	Extremely successful	Extremely successful	Somewhat successful	Somewhat successful	Extremely successful	Extremely successful	Somewhat successful	5	6	2	4	2	5	2	6	5	4	6	6	5	5	21-3 years	5
242	I am a student	NULL	NULL	Life Sciences	NULL	NULL	NULL	NULL	NULL	Doctoral degree (PhD/DPhil/MD)	NULL	31-4 hours	Discussed your performance	7	1	5	5	4	8	4	4	Extremely important	Extremely important	Extremely important	Extremely important	Neutral	Somewhat successful	I don't know	Neutral	Somewhat successful	Extremely successful	Somewhat successful	I don't know	3	4	4	4	4	4	5	6	5	3	3	4	4	6	NULL	6
243	I am employed / contracted / freelance	NULL	NULL	Physical Sciences	Academia / university	Senior Lecturer / Associate Professor	Yes, I manage 1 person	Full-time permanent	NULL	NULL	Mostly primary sources / artefacts	31-4 hours	Noted your achievements;Supported you with personal issues						3	5	6	Extremely important	Extremely important	Somewhat important	Somewhat important	Somewhat unsuccesful	Somewhat unsuccesful	Somewhat unsuccesful	Somewhat unsuccesful	Somewhat unsuccesful	Neutral	Neutral	Neutral	5	6	5	3	2	4	4	4	5	3	2	6	6	2	11-2 years	3
244	I am looking for work / unemployed	NULL	NULL	Life Sciences	NULL	NULL	NULL	NULL	NULL	NULL	NULL	NULL	NULL									Extremely important	Extremely important	Extremely important	Extremely important	NULL	NULL	NULL	NULL	NULL	NULL	NULL	NULL															6-1 years
245	I am employed / contracted / freelance	NULL	NULL	Life Sciences	Academia / university	Independent Fellow	Yes, I manage multiple people	Full-time permanent	NULL	NULL	Mostly wet lab – based on experimental equipment and reagents	41-5 hours	Had a conversation with you about your career aspirations;Provided career advice and guidance;Discussed your performance;Noted your achievements;Conducted a formal appraisal						4	5	4	Somewhat important	Somewhat important	Extremely important	Somewhat important	Somewhat successful	Neutral	Somewhat successful	Somewhat successful	Neutral	Somewhat successful	Neutral	Somewhat successful	4	6	4	4	1	4	6	5	4	5	6	2	2	5	11-2 years	6
246	I am employed / contracted / freelance	NULL	NULL	Humanities / Social Sciences	Not-for-profit research institute (including charity funded, research council funded etc)	Research / Technical Specialist	Yes, I manage multiple people	Full-time fixed term / contract	Less than 1 year	NULL	In the field	31-4 hours	None of the above						7	4	5	Extremely important	Extremely important	Extremely important	Extremely important	Somewhat successful	Neutral	Neutral	Somewhat successful	Neutral	Neutral	Neutral	Somewhat successful	3	6	4	2	6	4	4	6	5	6	6	6	4	4	1-2 years	7
247	I am employed / contracted / freelance	NULL	NULL	Humanities / Social Sciences	Academia / university	Reader	Yes, I manage multiple people	Full-time permanent	NULL	NULL	In the field	61-7 hours	Had a conversation with you about your career aspirations;Discussed your performance;Noted your achievements;Offered you training to support your skill development;Supported your wellbeing;Conducted a formal appraisal						6	6	6	Somewhat important	Extremely important	Extremely important	Extremely important	Extremely successful	Somewhat successful	Extremely successful	Somewhat successful	Somewhat successful	Somewhat successful	Somewhat successful	Somewhat successful	6	5	6	5	6	3	5	5	3	6	6	5	5	6	11-2 years	6
248	I am employed / contracted / freelance	NULL	NULL	Life Sciences	Academia / university	Lecturer / Assistant Professor	Yes, I manage 1 person	Part-time fixed term / contract	3-5 years	NULL	Mostly wet lab – based on experimental equipment and reagents	21-3 hours	Had a conversation with you about your career aspirations;Provided career advice and guidance;Discussed your performance;Noted your achievements;Provided an example of appropriate research standards;Supported your wellbeing;Provided expert advice;Conducted a formal appraisal;Discussed alternative career options						3	1	3	Neutral	Extremely important	Extremely important	Extremely important	Extremely successful	Extremely successful	Extremely successful	Extremely successful	Somewhat unsuccesful	Somewhat unsuccesful	Somewhat unsuccesful	Somewhat unsuccesful	4	5	3	4	4	4	4	4	5	3	4	4	6	5	3-5 years	2
249	I am employed / contracted / freelance	NULL	NULL	Life Sciences	Academia / university	Research Support Staff	No	Full-time fixed term / contract	1-2 years	NULL	Other - a mixture of above	31-4 hours	Offered you training to support your skill development;Conducted a formal appraisal						5	3	5	Extremely important	Extremely important	Extremely important	Somewhat important	Somewhat successful	Somewhat unsuccesful	Extremely successful	Somewhat unsuccesful	Extremely successful	Somewhat successful	Somewhat successful	Neutral	1	1	1	2	5	4	4	5	3	3	8	8	5	8	11-2 years	2
250	I am employed / contracted / freelance;I am looking for work / unemployed	NULL	NULL	Physical Sciences;Humanities / Social Sciences	SME / start-up company	Director	No	Freelance / self-employed	NULL	NULL	Mostly primary sources / artefacts	31-4 hours	Connected you to others within or outside your field						1	1	1	Extremely important	Extremely important	Extremely important	Extremely important	Neutral	Neutral	Neutral	Somewhat successful	Neutral	Somewhat successful	Neutral	Neutral	4	4	6	4	5	4	5	8	8	8	8	7	7	1	11-2 years	6
251	I am employed / contracted / freelance	NULL	NULL	Life Sciences	Academia / university	Postdoc / Research Associate	No	Full-time fixed term / contract	3-5 years	NULL	Mostly wet lab – based on experimental equipment and reagents	31-4 hours	Had a conversation with you about your career aspirations;Provided career advice and guidance;Connected you to others within or outside your field	6	7	5	3	5	4	3	5	Extremely important	Extremely important	Extremely important	Extremely important	Extremely successful	Neutral	Somewhat successful	Somewhat successful	Somewhat successful	Somewhat unsuccesful	Neutral	Somewhat unsuccesful	3	5	6	4	2	3	4	5	2	4	7	3	5	6	6-1 years	6
252	I am employed / contracted / freelance	NULL	NULL	Physical Sciences	Government laboratory	Research Support Staff	Yes, I manage 1 person	Full-time fixed term / contract	3-5 years	NULL	Other	41-5 hours	Had a conversation with you about your career aspirations;Discussed your performance;Supported your wellbeing;Conducted a formal appraisal						5	5	5	Extremely important	Somewhat important	Extremely important	Somewhat important	Somewhat successful	Somewhat successful	Somewhat successful	Somewhat successful	Somewhat successful	Extremely successful	Somewhat successful	Extremely successful	7	5	5	5	4	3	3	6	3	6	6	5	3	7	6-1 years	5
253	I am employed / contracted / freelance	NULL	NULL	Life Sciences	Academia / university	Group Leader	Yes, I manage multiple people	Full-time fixed term / contract	1-2 years	NULL	Mostly computational	41-5 hours	None of the above						3	1	3	Extremely important	Extremely important	Extremely important	Extremely important	Somewhat successful	Extremely successful	Somewhat successful	Extremely successful	Somewhat successful	Neutral	Somewhat successful	Somewhat unsuccesful	6	3	4	4	4	4	5	4	3	2	4	5	5	4	6-1 years	5
254	I am employed / contracted / freelance	NULL	NULL	Life Sciences	Academia / university	Independent Fellow	No	Full-time fixed term / contract	3-5 years	NULL	Mostly wet lab – based on experimental equipment and reagents	41-5 hours	Provided career advice and guidance;Provided expert advice						1	2	2	Extremely important	Extremely important	Extremely important	Extremely important	Extemely unsuccesful	Somewhat unsuccesful	Somewhat successful	Somewhat successful	Somewhat successful	Somewhat successful	Somewhat successful	Extemely unsuccesful	6	6	6	5	3	5	3	6	7	3	6	3	5	6	6-1 years	2
255	I am employed / contracted / freelance	NULL	NULL	Life Sciences	Academia / university	Head of Department	Yes, I manage multiple people	Full-time permanent	NULL	NULL	Mostly wet lab – based on experimental equipment and reagents	51-6 hours	Not applicable						7	7	7	Neutral	Extremely important	Extremely important	Extremely important	Somewhat successful	Neutral	Extremely successful	Neutral	Somewhat successful	Neutral	Extremely successful	Neutral	7	7	6	5	2	1	1	7	5	4	6	7	7	7	11-2 years	7
256	I am employed / contracted / freelance	NULL	NULL	Life Sciences;Physical Sciences	Academia / university	Professor	Yes, I manage multiple people	Full-time permanent	NULL	NULL	Mostly computational	41-5 hours	Not applicable						3	5	5	Extremely important	Extremely important	Extremely important	Extremely important	Somewhat successful	Somewhat successful	Extremely successful	Extremely successful	Somewhat successful	Somewhat unsuccesful	Somewhat successful	Neutral	5	4	5	5	2	3	4	6	6	3	5	3	5	6	11-2 years	7
257	I am employed / contracted / freelance	NULL	NULL	Life Sciences	Academia / university	Reader	Yes, I manage multiple people	Full-time fixed term / contract	3-5 years	NULL	Mostly human participants	71-8 hours	Noted your achievements;Connected you to others within or outside your field;Provided expert advice						3	1	2	Extremely important	Extremely important	Extremely important	Extremely important	Somewhat unsuccesful	Somewhat unsuccesful	Somewhat unsuccesful	Neutral	Somewhat unsuccesful	Extemely unsuccesful	Somewhat unsuccesful	Neutral	2	1	2	2	7	6	6	2	7	3	2	6	5	2	6-1 years	4
258	I am employed / contracted / freelance	NULL	NULL	Life Sciences	Academia / university	Lecturer / Assistant Professor	Yes, I manage multiple people	Full-time permanent	NULL	NULL	Other - a mixture of above	61-7 hours	None of the above						1	1	4	Extremely important	Extremely important	Extremely important	Extremely important	Somewhat successful	Somewhat successful	Somewhat successful	Somewhat successful	Extemely unsuccesful	Extemely unsuccesful	Extemely unsuccesful	Extemely unsuccesful	1	1	1	1	7	5	6	1	7	1	2	7	7	3	11-2 years	1
259	I am employed / contracted / freelance	NULL	NULL	Life Sciences	Academia / university	Independent Fellow	Yes, I manage 1 person	Full-time permanent	NULL	NULL	Mostly wet lab – based on experimental equipment and reagents	51-6 hours	Had a conversation with you about your career aspirations;Provided career advice and guidance;Discussed your performance;Noted your achievements;Offered you training to support your skill development;Provided an example of appropriate research standards;Provided expert advice;Conducted a formal appraisal						4	4	2	Extremely important	Extremely important	Extremely important	Somewhat important	Somewhat successful	Somewhat successful	Extremely successful	Somewhat successful	Neutral	Neutral	Somewhat successful	Somewhat successful	6	3	4	5	3	1	3	7	1	6	7	1	4	1	3-5 years	7
260	I am a student	NULL	NULL	Life Sciences	NULL	NULL	NULL	NULL	NULL	Doctoral degree (PhD/DPhil/MD)	NULL	41-5 hours	Discussed your performance;Noted your achievements	6	7	5	5	5	5	6	5	Somewhat important	Extremely important	Extremely important	Extremely important	Somewhat successful	Somewhat successful	Somewhat successful	Neutral	Somewhat successful	Somewhat successful	Somewhat successful	Somewhat successful	6	6	6	5	5	3	4	5	3	5	5	3	8	5	NULL	5
261	I am employed / contracted / freelance	NULL	NULL	Life Sciences	Academia / university	Professor	Yes, I manage multiple people	Full-time permanent	NULL	NULL	Other - a mixture of above	71-8 hours	Discussed your performance;Noted your achievements;Offered you training to support your skill development;Supported your wellbeing;Conducted a formal appraisal;Requested your feedback on their management of you						4	6	3	Extremely important	Extremely important	Extremely important	Extremely important	Extremely successful	Extremely successful	Extremely successful	Extremely successful	Neutral	Neutral	Somewhat successful	Somewhat successful	1	7	7	4	2	3	2	7	3	6	6	1	5	6	3+ years	6
262	I used to be part of the research community, but no longer am	Too difficult to find a job / insecure career path;Too difficult to obtain funding;For a better work-life balance;It was impacting on my wellbeing and mental health;Bullying and harassment	5+ years ago	NULL	NULL	NULL	NULL	NULL	NULL	NULL	NULL	NULL	NULL									NULL	NULL	NULL	NULL	NULL	NULL	NULL	NULL	NULL	NULL	NULL	NULL															NULL
263	I am employed / contracted / freelance	NULL	NULL	Humanities / Social Sciences	Academia / university	Professor	Yes, I manage multiple people	Full-time permanent	NULL	NULL	Mostly primary sources / artefacts	31-4 hours	Conducted a formal appraisal						4	6	4	Extremely important	Extremely important	Extremely important	Extremely important	Extremely successful	Extremely successful	Extremely successful	Extremely successful	Somewhat successful	Somewhat unsuccesful	Somewhat successful	Somewhat successful	3	6	6	4	3	4	4	5	4	5	5	3	5	7	21-3 years	7
264	I am employed / contracted / freelance	NULL	NULL	Life Sciences	Academia / university	Dean	Yes, I manage multiple people	Full-time permanent	NULL	NULL	Mostly wet lab – based on experimental equipment and reagents	51-6 hours	Noted your achievements;Supported you with personal issues;Supported your wellbeing						5	3	4	Somewhat important	Extremely important	Extremely important	Somewhat important	Extremely successful	Somewhat successful	Extremely successful	Somewhat successful	Somewhat successful	Somewhat successful	Extremely successful	Somewhat successful	3	6	6	5	3	4	5	6	3	5	5	5	3	7	3+ years	5
265	I am employed / contracted / freelance	NULL	NULL	Life Sciences	Academia / university	Postdoc / Research Associate	Yes, I manage multiple people	Full-time fixed term / contract	5+ years	NULL	Mostly wet lab – based on experimental equipment and reagents	51-6 hours	None of the above	1	5	1	5	7	8	1	5	Extremely important	Extremely important	Extremely important	Extremely important	Somewhat successful	Somewhat successful	Neutral	Extemely unsuccesful	Somewhat unsuccesful	Somewhat successful	Somewhat successful	Somewhat unsuccesful	3	3	6	5	6	4	5	5	7	6	6	6	5	3	6-1 years	5
266	I am employed / contracted / freelance	NULL	NULL	Life Sciences;Physical Sciences	Academia / university	Reader	Yes, I manage multiple people	Full-time permanent	NULL	NULL	Mostly wet lab – based on experimental equipment and reagents	51-6 hours	None of the above						2	1	1	Somewhat important	Extremely important	Extremely important	Extremely important	Somewhat successful	Extremely successful	Extremely successful	Extremely successful	Somewhat unsuccesful	Extemely unsuccesful	Extemely unsuccesful	Extemely unsuccesful	1	1	1	8	6	8	6	2	6	1	1	6	6	2	21-3 years	1
267	I am employed / contracted / freelance	NULL	NULL	Life Sciences	Academia / university	Other - Research Fellow	No	Full-time fixed term / contract	3-5 years	NULL	Mostly computational	41-5 hours	Had a conversation with you about your career aspirations;Discussed your performance;Noted your achievements;Offered you training to support your skill development;Connected you to others within or outside your field;Supported your wellbeing;Provided expert advice;Conducted a formal appraisal						5	6	6	Extremely important	Extremely important	Extremely important	Extremely important	Somewhat successful	Extremely successful	Neutral	Extremely successful	Somewhat successful	Somewhat successful	Extremely successful	Neutral	6	7	7	4	4	4	5	6	5	5	6	5	4	4	6-1 years	5
268	I am employed / contracted / freelance	NULL	NULL	Other	Academia / university	Professor	Yes, I manage multiple people	Full-time permanent	NULL	NULL	In the field	31-4 hours	Supported you with personal issues;Conducted a formal appraisal						3	3	4	Somewhat important	Somewhat important	Somewhat important	Somewhat important	Somewhat successful	Somewhat successful	Somewhat successful	Somewhat successful	Somewhat successful	Somewhat successful	Somewhat successful	Somewhat successful	5	5	5	4	4	4	4	5	3	5	6	3	3	5	3+ years	5
269	I am employed / contracted / freelance	NULL	NULL	Humanities / Social Sciences	Academia / university	Professor	Yes, I manage multiple people	Full-time permanent	NULL	NULL	In the field	51-6 hours	Not applicable						5	5	5	Extremely important	Extremely important	Somewhat important	Extremely important	Somewhat successful	Neutral	Somewhat successful	Extemely unsuccesful	Neutral	Neutral	Somewhat unsuccesful	Extemely unsuccesful	6	4	6	3	4	4	7	6	4	4	4	6	6	3	3+ years	6
270	I used to be part of the research community, but no longer am	I'm no longer interested in a research-related career;I wanted to apply my skills elsewhere;Too difficult to find a job / insecure career path	5+ years ago	NULL	NULL	NULL	NULL	NULL	NULL	NULL	NULL	NULL	NULL									NULL	NULL	NULL	NULL	NULL	NULL	NULL	NULL	NULL	NULL	NULL	NULL															NULL
271	I am employed / contracted / freelance	NULL	NULL	Life Sciences	Academia / university	Professor	Yes, I manage multiple people	Full-time permanent	NULL	NULL	Mostly wet lab – based on experimental equipment and reagents	41-5 hours	Conducted a formal appraisal						2	3	7	Somewhat important	Extremely important	Extremely important	Somewhat important	Extremely successful	Extremely successful	Extremely successful	Somewhat unsuccesful	Somewhat unsuccesful	Somewhat unsuccesful	Somewhat unsuccesful	Somewhat unsuccesful	5	5	5	4	1	1	3	4	5	2	4	5	7	5	11-2 years	6
272	I am employed / contracted / freelance	NULL	NULL	Other	Not-for-profit research institute (including charity funded, research council funded etc)	Postdoc / Research Associate	Yes, I manage multiple people	Part-time permanent	NULL	NULL	Mostly human participants	31-4 hours	Discussed your performance;Provided an example of appropriate ethical codes;Noted your achievements;Offered you training to support your skill development;Provided an example of appropriate research standards;Supported your wellbeing;Conducted a formal appraisal;Requested your feedback on their management of you	6			1	6	2	5	6	Extremely important	Extremely important	Extremely important	Somewhat important	Somewhat successful	Somewhat successful	Somewhat successful	Neutral	Somewhat successful	Somewhat successful	Somewhat successful	Neutral	3	7	2	5	4	7	5	7	5	4	5	2	1	8	11-2 years	6
273	I am employed / contracted / freelance	NULL	NULL	Life Sciences	Academia / university	Independent Fellow	Yes, I manage multiple people	Full-time fixed term / contract	3-5 years	NULL	Mostly wet lab – based on experimental equipment and reagents	61-7 hours	Had a conversation with you about your career aspirations;Provided career advice and guidance;Discussed your performance;Noted your achievements;Provided expert advice;Conducted a formal appraisal						2	2	7	Somewhat important	Extremely important	Extremely important	Extremely important	Somewhat successful	Extremely successful	Extremely successful	Extremely successful	Extemely unsuccesful	Somewhat successful	Somewhat successful	Somewhat successful	4	5	6	4	3	7	3	4	7	3	5	4	2	7	11-2 years	5
274	I am employed / contracted / freelance	NULL	NULL	Humanities / Social Sciences	Academia / university	Senior Lecturer / Associate Professor	Yes, I manage multiple people	Part-time permanent	NULL	NULL	Mostly human participants	31-4 hours	Had a conversation with you about your career aspirations;Discussed your performance;Supported you with personal issues;Conducted a formal appraisal						4	2	6	Extremely important	Somewhat important	Extremely important	Extremely important	Somewhat successful	Somewhat successful	Extremely successful	Extremely successful	Extremely successful	Somewhat successful	Somewhat successful	Extremely successful	5	5	5	6	6	2	5	5	5	3	4	3	4	6	11-2 years	5
275	I am a student	NULL	NULL	Life Sciences	NULL	NULL	NULL	NULL	NULL	Doctoral degree (PhD/DPhil/MD)	NULL	61-7 hours	Discussed your performance;Provided expert advice;Conducted a formal appraisal	6	7	1	6	5	4	4	4	Extremely important	Somewhat important	Extremely important	Somewhat important	Neutral	Neutral	Neutral	Neutral	Neutral	Neutral	Neutral	Neutral	3	6	6	6	6	7	7	5	4	4	5	3	3	4	NULL	3
276	I am employed / contracted / freelance	NULL	NULL	Life Sciences;Physical Sciences	Academia / university	Dean	Yes, I manage multiple people	Full-time permanent	NULL	NULL	Mostly human participants	41-5 hours	Had a conversation with you about your career aspirations;Provided career advice and guidance;Discussed your performance;Provided an example of appropriate ethical codes;Noted your achievements;Offered you training to support your skill development;Provided an example of appropriate research standards;Connected you to others within or outside your field;Supported you with personal issues;Supporte…						7	7	7	Extremely important	Extremely important	Extremely important	Extremely important	Extremely successful	Extremely successful	Extremely successful	Extremely successful	Extremely successful	Extremely successful	Extremely successful	Extremely successful	7	6	7	6	4	1	4	7	1	5	6	2	1	7	11-2 years	7
277	I am employed / contracted / freelance	NULL	NULL	Humanities / Social Sciences;Other	Academia / university	Professor	Yes, I manage multiple people	Full-time permanent	NULL	NULL	Mostly human participants	31-4 hours	None of the above						3	2	3	Extremely important	Extremely important	Extremely important	Extremely important	Extremely successful	Extremely successful	Extremely successful	Extremely successful	Somewhat successful	Extremely successful	Extremely successful	Somewhat unsuccesful	7	6	7	4	3	2	4	5	6	4	5	6	6	2	11-2 years	6
278	I am employed / contracted / freelance	NULL	NULL	Life Sciences	Not-for-profit research institute (including charity funded, research council funded etc)	Postdoc / Research Associate	No	Full-time fixed term / contract	3-5 years	NULL	Mostly computational	41-5 hours	Had a conversation with you about your career aspirations;Provided career advice and guidance;Noted your achievements;Connected you to others within or outside your field;Discussed alternative career options	6	7	2	6	6	5	5	6	Extremely important	Somewhat important	Extremely important	Somewhat important	Extremely successful	Somewhat successful	Neutral	Somewhat unsuccesful	Extremely successful	Somewhat successful	Somewhat successful	Neutral	3	5	6	5	3	4	3	3	5	5	5	1	1	7	11-2 years	3
279	I am employed / contracted / freelance	NULL	NULL	Physical Sciences;Humanities / Social Sciences	Academia / university	Professor	Yes, I manage multiple people	Full-time fixed term / contract	3-5 years	NULL	Mostly computational	41-5 hours	Supported you with personal issues;Provided expert advice;Requested your feedback on their management of you						5	6	4	Somewhat unimportant	Somewhat important	Extremely important	Somewhat important	Somewhat unsuccesful	Somewhat successful	Somewhat successful	Neutral	Neutral	Somewhat unsuccesful	Somewhat unsuccesful	Neutral	3	5	6	4	6	7	7	3	6	3	3	6	4	5	6-1 years	4
280	I am employed / contracted / freelance	NULL	NULL	Life Sciences	Academia / university	Postdoc / Research Associate	Yes, I manage 1 person	Part-time fixed term / contract	1-2 years	NULL	Mostly human participants	21-3 hours	Had a conversation with you about your career aspirations;Discussed your performance;Provided an example of appropriate ethical codes;Noted your achievements;Connected you to others within or outside your field;Supported you with personal issues;Supported your wellbeing;Provided expert advice;Conducted a formal appraisal	5	7	7	2	6	4	3	4	Extremely important	Extremely important	Extremely important	Extremely important	Somewhat successful	Somewhat successful	Somewhat successful	Neutral	Somewhat successful	Somewhat successful	Somewhat successful	Somewhat unsuccesful	5	5	5	3	6	4	4	5	4	3	4	5	5	2	11-2 years	5
281	I am employed / contracted / freelance	NULL	NULL	Humanities / Social Sciences	Academia / university	Senior Lecturer / Associate Professor	Yes, I manage multiple people	Full-time permanent	NULL	NULL	Mostly human participants	41-5 hours	None of the above						2	1	2	Somewhat important	Somewhat important	Somewhat important	Extremely important	Neutral	Somewhat unsuccesful	Neutral	Somewhat successful	Somewhat unsuccesful	Somewhat successful	Somewhat unsuccesful	Neutral	5	2	4	3	5	6	6	2	7	5	5	7	6	4	21-3 years	2
282	I am a student	NULL	NULL	Life Sciences	NULL	NULL	NULL	NULL	NULL	Doctoral degree (PhD/DPhil/MD)	NULL	41-5 hours	Provided career advice and guidance;Discussed your performance;Noted your achievements;Offered you training to support your skill development;Conducted a formal appraisal;Discussed alternative career options	5	5	5	1	7	5	4	5	Extremely important	Extremely important	Extremely important	Extremely important	Somewhat successful	Somewhat successful	Somewhat successful	Somewhat successful	Somewhat successful	Extremely successful	Somewhat successful	Somewhat successful	4	5	4	4	3	2	4	6	2	5	6	2	2	5	NULL	5
283	I am employed / contracted / freelance	NULL	NULL	Other	Academia / university	Independent Fellow	No	Other	NULL	NULL	Mostly human participants	31-4 hours	Had a conversation with you about your career aspirations;Provided career advice and guidance;Noted your achievements;Offered you training to support your skill development;Provided an example of appropriate research standards;Connected you to others within or outside your field;Supported you with personal issues;Supported your wellbeing;Provided expert advice;Conducted a formal appraisal;Request…						4	5	5	Extremely important	Extremely important	Extremely important	Extremely important	Extremely successful	Extremely successful	Extremely successful	Extremely successful	Neutral	Neutral	Somewhat successful	Neutral	6	4	5	4	6	2	2	7	3	5	5	2	2	7	6-1 years	6
284	I used to be part of the research community, but no longer am	Too difficult to find a job / insecure career path	5+ years ago	NULL	NULL	NULL	NULL	NULL	NULL	NULL	NULL	NULL	NULL									NULL	NULL	NULL	NULL	NULL	NULL	NULL	NULL	NULL	NULL	NULL	NULL															NULL
285	I am a student	NULL	NULL	Life Sciences	NULL	NULL	NULL	NULL	NULL	Doctoral degree (PhD/DPhil/MD)	NULL	31-4 hours	Connected you to others within or outside your field;Provided expert advice	6	6	6	2	5	4	3	2	Extremely important	Extremely important	Extremely important	Extremely important	Somewhat successful	Extremely successful	Extremely successful	Somewhat successful	Somewhat successful	Somewhat successful	Somewhat successful	Somewhat successful	6	5	5	5	5	4	3	5	6	6	6	3	3	4	NULL	5
286	I am employed / contracted / freelance	NULL	NULL	Humanities / Social Sciences	Academia / university	Professor	No	Full-time permanent	NULL	NULL	Mostly primary sources / artefacts	41-5 hours	Had a conversation with you about your career aspirations;Discussed your performance;Noted your achievements;Offered you training to support your skill development;Conducted a formal appraisal						4	4	5	Somewhat important	Extremely important	Extremely important	Extremely important	Somewhat successful	Somewhat successful	Extremely successful	Somewhat successful	Somewhat successful	Neutral	Somewhat successful	Somewhat successful	3	5	5	7	7	3	3	6	5	4	4	3	3	7	21-3 years	5
287	I am employed / contracted / freelance	NULL	NULL	Life Sciences	Academia / university	Postdoc / Research Associate	No	Full-time fixed term / contract	3-5 years	NULL	Mostly computational	41-5 hours	Provided career advice and guidance;Discussed alternative career options	3	7	6	2	7	2	2	2	Extremely important	Extremely important	Extremely important	Extremely important	Somewhat successful	Somewhat successful	Somewhat successful	Somewhat successful	Somewhat unsuccesful	Extemely unsuccesful	Extemely unsuccesful	Extemely unsuccesful	4	2	2	2	5	5	7	2	6	2	6	6	6	4	11-2 years	3
288	I am employed / contracted / freelance	NULL	NULL	Life Sciences;Humanities / Social Sciences;Other	Academia / university	Research Assistant	No	Full-time fixed term / contract	3-5 years	NULL	Mostly computational	31-4 hours	Had a conversation with you about your career aspirations;Provided career advice and guidance;Noted your achievements;Supported your wellbeing;Provided expert advice;Conducted a formal appraisal	3				5	1	3	1	Extremely important	Extremely important	Somewhat important	Extremely important	Somewhat unsuccesful	Somewhat unsuccesful	Somewhat successful	Somewhat unsuccesful	I don't know	I don't know	Somewhat successful	I don't know	7	1	3	4	2	3	5	6	4	1	5	1	4	3	6-1 years	5
289	I am employed / contracted / freelance	NULL	NULL	Life Sciences	Academia / university	Postdoc / Research Associate	Yes, I manage 1 person	Full-time fixed term / contract	1-2 years	NULL	Mostly human participants	41-5 hours	Had a conversation with you about your career aspirations;Provided career advice and guidance;Discussed your performance;Noted your achievements;Offered you training to support your skill development;Connected you to others within or outside your field;Supported you with personal issues;Supported your wellbeing;Provided expert advice;Conducted a formal appraisal	3	1	7	1	7	2	2	6	Somewhat important	Extremely important	Somewhat important	Somewhat important	Extremely successful	Extremely successful	Extremely successful	Somewhat successful	Somewhat successful	Neutral	Somewhat successful	Neutral	6	7	5	6	5	2	2	7	2	2	6	3	3	3	3-5 years	6
290	I am employed / contracted / freelance	NULL	NULL	Life Sciences	Academia / university	Independent Fellow	No	Part-time permanent	NULL	NULL	Mostly computational	31-4 hours	None of the above						1	1	1	Extremely important	Extremely important	Extremely important	Extremely important	Somewhat successful	Somewhat unsuccesful	Somewhat unsuccesful	Neutral	Extremely successful	Extemely unsuccesful	Extemely unsuccesful	Extemely unsuccesful	7	2	3	2	7	7	7	7	6	2	2	3	7	1	3-5 years	5
291	I am employed / contracted / freelance	NULL	NULL	Life Sciences	Academia / university	Senior Lecturer / Associate Professor	No	Full-time permanent	NULL	NULL	Mostly human participants	31-4 hours	Had a conversation with you about your career aspirations;Provided career advice and guidance;Discussed your performance;Noted your achievements;Connected you to others within or outside your field;Supported you with personal issues;Supported your wellbeing;Provided expert advice;Conducted a formal appraisal						4	5	3	Neutral	Extremely important	Somewhat important	Extremely important	Somewhat unsuccesful	Neutral	Neutral	Somewhat successful	Somewhat unsuccesful	Somewhat successful	Neutral	Somewhat successful	5	7	5	4	4	4	5	3	5	7	4	2	2	5	21-3 years	5
292	I am a student	NULL	NULL	Life Sciences	NULL	NULL	NULL	NULL	NULL	Doctoral degree (PhD/DPhil/MD)	NULL	41-5 hours	Noted your achievements;Supported you with personal issues;Supported your wellbeing;Provided expert advice	5	3	3	5	6	3	8	3	Extremely important	Extremely important	Extremely important	Somewhat important	Neutral	Somewhat successful	Neutral	Neutral	Somewhat successful	Somewhat successful	Somewhat successful	Somewhat successful	2	4	4	4	4	6	5	4	4	5	4	4	2	8	NULL	5
293	I am employed / contracted / freelance	NULL	NULL	Life Sciences	Academia / university	Senior Lecturer / Associate Professor	Yes, I manage multiple people	Full-time permanent	NULL	NULL	Mostly wet lab – based on experimental equipment and reagents	61-7 hours	Conducted a formal appraisal						2	1	2	Extremely important	Extremely important	Extremely important	Extremely important	Somewhat successful	Extremely successful	Extremely successful	Somewhat successful	Somewhat successful	Extemely unsuccesful	Somewhat unsuccesful	Extemely unsuccesful	1	1	2	4	7	4	4	6	6	1	1	5	6	2	11-2 years	2
294	I am employed / contracted / freelance	NULL	NULL	Life Sciences	Academia / university	Senior Lecturer / Associate Professor	Yes, I manage multiple people	Full-time permanent	NULL	NULL	Mostly wet lab – based on experimental equipment and reagents	31-4 hours	Had a conversation with you about your career aspirations;Provided career advice and guidance;Noted your achievements;Offered you training to support your skill development;Connected you to others within or outside your field;Provided expert advice						6	6	6	Extremely important	Extremely important	Extremely important	Extremely important	Somewhat successful	Extremely successful	Extremely successful	Extremely successful	Somewhat successful	Extremely successful	Somewhat successful	Somewhat successful	7	7	7	7	3	3	4	7	3	6	7	2	2	7	11-2 years	6
295	I am employed / contracted / freelance	NULL	NULL	Life Sciences	Academia / university	Group Leader	Yes, I manage multiple people	Full-time permanent	NULL	NULL	Mostly wet lab – based on experimental equipment and reagents	41-5 hours	Had a conversation with you about your career aspirations;Connected you to others within or outside your field;Conducted a formal appraisal						4	2	3	Extremely important	Somewhat important	Extremely important	Extremely important	Somewhat successful	Somewhat successful	Extremely successful	Somewhat successful	Somewhat successful	Neutral	Somewhat unsuccesful	Neutral	4	5	3	4	5	5	6	4	6	3	3	6	6	5	11-2 years	4
296	I am a student	NULL	NULL	Life Sciences	NULL	NULL	NULL	NULL	NULL	Doctoral degree (PhD/DPhil/MD)	NULL	51-6 hours	Had a conversation with you about your career aspirations;Provided career advice and guidance;Discussed your performance;Noted your achievements;Provided expert advice;Conducted a formal appraisal	5			2	7	3	4	2	Somewhat important	Somewhat important	Somewhat important	Extremely important	Extremely successful	Neutral	Extremely successful	Somewhat successful	Neutral	Neutral	Neutral	Neutral	4	6	6	5	5	5	2	4	6	3	5	2	5	5	NULL	6
297	I am retired	NULL	NULL	Physical Sciences	NULL	NULL	NULL	NULL	NULL	NULL	NULL	NULL	NULL									Extremely important	Extremely important	Extremely important	Extremely important	NULL	NULL	NULL	NULL	NULL	NULL	NULL	NULL															NULL
298	I am employed / contracted / freelance	NULL	NULL	Life Sciences	Academia / university	Lecturer / Assistant Professor	Yes, I manage 1 person	Full-time fixed term / contract	Less than 1 year	NULL	Mostly wet lab – based on experimental equipment and reagents	41-5 hours	Had a conversation with you about your career aspirations;Provided career advice and guidance;Discussed your performance;Noted your achievements;Offered you training to support your skill development;Connected you to others within or outside your field;Supported you with personal issues;Supported your wellbeing;Provided expert advice;Conducted a formal appraisal;Discussed alternative career optio…						3	3	3	Extremely important	Extremely important	Extremely important	Extremely important	Somewhat successful	Somewhat successful	Somewhat successful	Neutral	Neutral	Neutral	Neutral	Extemely unsuccesful	5	4	5	4	3	6	5	5	6	2	4	7	7	7	21-3 years	4
299	I am a student	NULL	NULL	Life Sciences	NULL	NULL	NULL	NULL	NULL	Doctoral degree (PhD/DPhil/MD)	NULL	51-6 hours	Had a conversation with you about your career aspirations;Provided career advice and guidance;Discussed your performance;Noted your achievements;Offered you training to support your skill development;Provided an example of appropriate research standards;Connected you to others within or outside your field;Supported you with personal issues;Supported your wellbeing;Provided expert advice	7	7	7	1	7	6	6	6	Extremely important	Extremely important	Extremely important	Extremely important	Somewhat successful	Extremely successful	Extremely successful	Somewhat successful	Somewhat successful	Somewhat successful	Somewhat successful	Somewhat successful	7	7	7	5	1	3	1	7	1	7	7	1	1	8	NULL	7
300	I am a student	NULL	NULL	Life Sciences	NULL	NULL	NULL	NULL	NULL	Doctoral degree (PhD/DPhil/MD)	NULL	61-7 hours	Conducted a formal appraisal	1	4	1	7	4	2	1	1	Neutral	Extremely important	Extremely important	Extremely important	Extemely unsuccesful	Extemely unsuccesful	Extemely unsuccesful	Extemely unsuccesful	Extremely successful	Somewhat unsuccesful	Somewhat successful	Somewhat unsuccesful	6	5	1	3	5	4	7	5	4	1	3	3	3	1	NULL	1
301	I am employed / contracted / freelance	NULL	NULL	Life Sciences	Academia / university	Senior Lecturer / Associate Professor	Yes, I manage multiple people	Full-time permanent	NULL	NULL	Mostly computational	51-6 hours	Had a conversation with you about your career aspirations;Provided career advice and guidance;Discussed your performance;Noted your achievements;Offered you training to support your skill development;Connected you to others within or outside your field;Supported you with personal issues;Supported your wellbeing;Provided expert advice;Conducted a formal appraisal;Requested your feedback on their m…						5	4	5	Somewhat important	Neutral	Somewhat important	Somewhat important	Somewhat successful	Somewhat successful	Somewhat successful	Somewhat successful	Neutral	Somewhat successful	Somewhat successful	Neutral	5	5	5	5	3	3	3	5	4	6	5	4	5	5	6-1 years	5
302	I am employed / contracted / freelance	NULL	NULL	Life Sciences	Not-for-profit research institute (including charity funded, research council funded etc)	Group Leader	Yes, I manage multiple people	Full-time fixed term / contract	1-2 years	NULL	Mostly wet lab – based on experimental equipment and reagents	51-6 hours	Discussed your performance;Offered you training to support your skill development;Conducted a formal appraisal						4	3	6	Extremely important	Somewhat important	Extremely important	Somewhat important	Somewhat successful	Extremely successful	Somewhat successful	Somewhat successful	Somewhat successful	Somewhat successful	Neutral	Somewhat successful	4	5	4	4	4	6	5	3	5	4	4	2	3	6	11-2 years	4
303	I am employed / contracted / freelance	NULL	NULL	Life Sciences	Academia / university	Postdoc / Research Associate	Yes, I manage 1 person	Full-time fixed term / contract	1-2 years	NULL	Mostly wet lab – based on experimental equipment and reagents	41-5 hours	Had a conversation with you about your career aspirations;Provided career advice and guidance;Discussed your performance;Connected you to others within or outside your field	6	5	7	2	6	4	4	4	Extremely important	Extremely important	Extremely important	Somewhat important	Somewhat successful	Somewhat successful	Somewhat successful	Somewhat successful	Somewhat successful	Somewhat successful	Somewhat successful	Neutral	6	6	6	4	4	4	5	6	2	4	5	3	3	4	6-1 years	5
304	I am employed / contracted / freelance	NULL	NULL	Physical Sciences;Humanities / Social Sciences	Academia / university	Lecturer / Assistant Professor	Yes, I manage multiple people	Full-time permanent	NULL	NULL	Mostly primary sources / artefacts	61-7 hours	Discussed your performance;Noted your achievements;Offered you training to support your skill development;Conducted a formal appraisal						4	2	3	Somewhat important	Extremely important	Extremely important	Extremely important	Somewhat successful	Somewhat successful	Somewhat successful	Neutral	Somewhat unsuccesful	Somewhat unsuccesful	Somewhat successful	Neutral	5	5	5	5	3	3	3	5	3	3	5	5	5	6	6-1 years	5
305	I am employed / contracted / freelance	NULL	NULL	Life Sciences	Academia / university	Reader	Yes, I manage multiple people	Part-time fixed term / contract	1-2 years	NULL	Mostly computational	31-4 hours	Discussed your performance;Noted your achievements;Conducted a formal appraisal						5	5	3	Somewhat important	Extremely important	Extremely important	Somewhat important	Somewhat successful	Somewhat successful	Extremely successful	Somewhat successful	Somewhat unsuccesful	Neutral	Somewhat successful	Somewhat unsuccesful	5	5	5	4	3	2	4	5	3	6	5	6	3	6	11-2 years	5
306	I am a student	NULL	NULL	Life Sciences	NULL	NULL	NULL	NULL	NULL	Doctoral degree (PhD/DPhil/MD)	NULL	41-5 hours	Noted your achievements;Connected you to others within or outside your field;Supported you with personal issues	6	7	1	7	7	4	4	4	Somewhat important	Extremely important	Extremely important	Somewhat important	Extremely successful	Neutral	Neutral	Neutral	I don't know	I don't know	I don't know	I don't know	1	6	7	7	7	7	7	6	8	3	5	3	3	4	NULL	5
307	I am employed / contracted / freelance	NULL	NULL	Life Sciences	Academia / university	Group Leader	Yes, I manage multiple people	Full-time fixed term / contract	3-5 years	NULL	Mostly wet lab – based on experimental equipment and reagents	41-5 hours	None of the above						4	2	3	Extremely important	Extremely important	Extremely important	Extremely important	Somewhat successful	Neutral	Somewhat unsuccesful	Somewhat unsuccesful	Somewhat successful	Somewhat unsuccesful	Somewhat unsuccesful	Neutral	5	4	3	4	4	5	7	3	7	2	3	7	5	3	11-2 years	3
308	I am employed / contracted / freelance	NULL	NULL	Life Sciences	Academia / university	Laboratory / Facility Manager	Yes, I manage 1 person	Full-time permanent	NULL	NULL	Mostly wet lab – based on experimental equipment and reagents	41-5 hours	Provided career advice and guidance;Discussed your performance;Noted your achievements;Offered you training to support your skill development						5	4	3	Extremely important	Somewhat important	Extremely important	Somewhat important	Somewhat successful	Neutral	Somewhat successful	Neutral	Somewhat successful	Somewhat successful	Somewhat successful	Neutral	4	5	4	5	4	3	3	6	4	5	5	7	3	8	11-2 years	4
309	I am employed / contracted / freelance	NULL	NULL	Humanities / Social Sciences	Academia / university	Lecturer / Assistant Professor	Yes, I manage multiple people	Full-time fixed term / contract	3-5 years	NULL	In the field	41-5 hours	Had a conversation with you about your career aspirations;Provided career advice and guidance;Discussed your performance;Noted your achievements;Offered you training to support your skill development;Supported your wellbeing;Provided expert advice;Conducted a formal appraisal						4	6	4	Extremely important	Somewhat important	Extremely important	Somewhat important	Somewhat successful	Somewhat successful	Somewhat successful	Neutral	Neutral	Somewhat successful	Somewhat successful	Somewhat unsuccesful	4	5	4	4	3	3	5	3	5	4	5	3	3	5	11-2 years	6
310	I am employed / contracted / freelance	NULL	NULL	Humanities / Social Sciences	Academia / university	Postdoc / Research Associate	Yes, I manage multiple people	Full-time fixed term / contract	3-5 years	NULL	Mostly human participants	31-4 hours	Had a conversation with you about your career aspirations;Provided career advice and guidance;Discussed your performance;Provided an example of appropriate ethical codes;Noted your achievements;Connected you to others within or outside your field;Supported your wellbeing;Provided expert advice;Conducted a formal appraisal	6	7	7	7	7	3	3	5	Extremely important	Extremely important	Extremely important	Extremely important	Somewhat unsuccesful	Somewhat successful	Extremely successful	Extemely unsuccesful	Somewhat unsuccesful	Somewhat successful	Somewhat successful	Extemely unsuccesful	6	6	6	6	3	2	2	6	2	5	5	2	2	6	6-1 years	5
311	I am employed / contracted / freelance	NULL	NULL	Other	Academia / university	Other	No	Full-time fixed term / contract	NULL	NULL	Mostly computational	41-5 hours	Had a conversation with you about your career aspirations;Provided career advice and guidance;Connected you to others within or outside your field;Conducted a formal appraisal;Discussed alternative career options						3	3	2	Neutral	Extremely important	Extremely important	Extremely important	Somewhat unsuccesful	Somewhat unsuccesful	Somewhat successful	Somewhat successful	Neutral	Neutral	Neutral	Neutral	1	4	3	4	4	5	3	5	4	3	4	4	4	4	3-5 years	4
312	I am employed / contracted / freelance	NULL	NULL	Life Sciences	Academia / university	Independent Fellow	Yes, I manage multiple people	Full-time fixed term / contract	3-5 years	NULL	Mostly wet lab – based on experimental equipment and reagents	41-5 hours	Had a conversation with you about your career aspirations;Provided career advice and guidance;Noted your achievements;Supported you with personal issues;Supported your wellbeing;Conducted a formal appraisal						4	4	6	Extremely important	Extremely important	Extremely important	Extremely important	Somewhat successful	Somewhat successful	Somewhat successful	Somewhat successful	Somewhat successful	Somewhat successful	Somewhat successful	Somewhat successful	4	4	5	3	7	6	6	5	7	3	5	7	5	6	11-2 years	6
313	I am employed / contracted / freelance	NULL	NULL	Life Sciences	Academia / university	Senior Lecturer / Associate Professor	Yes, I manage multiple people	Full-time permanent	NULL	NULL	Mostly wet lab – based on experimental equipment and reagents	51-6 hours	Discussed your performance;Provided expert advice;Conducted a formal appraisal						5	3	5	Extremely important	Extremely important	Extremely important	Somewhat important	Extremely successful	Somewhat successful	Extremely successful	Somewhat successful	Somewhat successful	Neutral	Neutral	Neutral	5	3	5	6	7	7	7	6	7	2	4	6	6	7	11-2 years	5
314	I am employed / contracted / freelance	NULL	NULL	Life Sciences	Academia / university	Postdoc / Research Associate	No	Full-time fixed term / contract	1-2 years	NULL	Mostly wet lab – based on experimental equipment and reagents	61-7 hours	Discussed your performance;Offered you training to support your skill development;Provided an example of appropriate research standards;Connected you to others within or outside your field;Conducted a formal appraisal	7	3	7	5	3	8	4	3	Extremely important	Extremely important	Extremely important	Extremely important	Somewhat successful	Neutral	Extremely successful	Somewhat successful	I don't know	Extremely successful	Extremely successful	Somewhat successful	2	7	4	3	6	7	4	5	4	6	5	8	4	6	3-5 years	6
315	I am employed / contracted / freelance	NULL	NULL	Humanities / Social Sciences	Academia / university	Lecturer / Assistant Professor	Yes, I manage multiple people	Full-time permanent	NULL	NULL	In the field	61-7 hours	Had a conversation with you about your career aspirations;Provided career advice and guidance;Discussed your performance;Noted your achievements;Connected you to others within or outside your field;Supported your wellbeing;Conducted a formal appraisal						3	3	5	Somewhat important	Somewhat important	Somewhat important	Somewhat important	Extremely successful	Extremely successful	Neutral	Neutral	Somewhat successful	Somewhat successful	Neutral	Neutral	2	6	6	3	2	4	5	3	2	5	4	7	4	7	6-1 years	4
316	I am a student	NULL	NULL	Life Sciences	NULL	NULL	NULL	NULL	NULL	Doctoral degree (PhD/DPhil/MD)	NULL	51-6 hours	Had a conversation with you about your career aspirations;Provided career advice and guidance;Discussed your performance;Connected you to others within or outside your field;Supported you with personal issues;Supported your wellbeing;Provided expert advice;Discussed alternative career options	6	7	6	1	7	6	4	6	Extremely important	Extremely important	Extremely important	Somewhat important	Somewhat successful	Extremely successful	Extremely successful	Neutral	Neutral	Somewhat successful	Extremely successful	Extremely successful	4	7	6	3	1	3	4	6	3	6	6	8	1	8	NULL	6
317	I used to be part of the research community, but no longer am	It was impacting on my wellbeing and mental health;Personal reasons;Other	5+ years ago	NULL	NULL	NULL	NULL	NULL	NULL	NULL	NULL	NULL	NULL									NULL	NULL	NULL	NULL	NULL	NULL	NULL	NULL	NULL	NULL	NULL	NULL															NULL
318	I am employed / contracted / freelance	NULL	NULL	Life Sciences	Academia / university	Professor	Yes, I manage multiple people	Full-time permanent	NULL	NULL	Mostly wet lab – based on experimental equipment and reagents	51-6 hours	Discussed your performance;Noted your achievements;Conducted a formal appraisal						2	1	2	Extremely important	Extremely important	Extremely important	Somewhat important	Somewhat successful	Neutral	Neutral	Neutral	Somewhat unsuccesful	Somewhat unsuccesful	Neutral	Somewhat unsuccesful	2	2	4	5	2	4	4	6	4	2	2	7	7	5	3+ years	2
319	I am employed / contracted / freelance	NULL	NULL	Life Sciences	Academia / university	Professor	Yes, I manage multiple people	Full-time fixed term / contract	3-5 years	NULL	In the field	51-6 hours	Had a conversation with you about your career aspirations;Provided career advice and guidance;Discussed your performance;Noted your achievements;Offered you training to support your skill development;Connected you to others within or outside your field;Provided expert advice;Conducted a formal appraisal						5	3	6	Extremely important	Extremely important	Extremely important	Extremely important	Somewhat successful	Extremely successful	Extremely successful	Somewhat successful	Somewhat successful	Extremely successful	Extremely successful	Extremely successful	2	6	6	4	4	3	4	6	3	5	5	5	4	5	11-2 years	5
320	I am employed / contracted / freelance	NULL	NULL	Life Sciences	Academia / university	Postdoc / Research Associate	Yes, I manage 1 person	Part-time fixed term / contract	3-5 years	NULL	Mostly human participants	31-4 hours	Connected you to others within or outside your field;Provided expert advice;Conducted a formal appraisal	1	7	6	1	7	2	2	2	Somewhat important	Extremely important	Extremely important	Somewhat important	Somewhat unsuccesful	Somewhat successful	Somewhat successful	Somewhat unsuccesful	Somewhat unsuccesful	Somewhat successful	Somewhat unsuccesful	Somewhat unsuccesful	6	5	5	3	2	2	5	3	6	1	5	1	1	6	11-2 years	5
321	I am a student	NULL	NULL	Life Sciences	NULL	NULL	NULL	NULL	NULL	Doctoral degree (PhD/DPhil/MD)	NULL	31-4 hours	Had a conversation with you about your career aspirations;Discussed your performance;Noted your achievements;Offered you training to support your skill development;Provided expert advice;Discussed alternative career options	4	6	6	4	6	4	5	3	Extremely important	Neutral	Extremely important	Somewhat important	Extremely successful	Somewhat successful	Extremely successful	Neutral	Somewhat successful	Neutral	Somewhat unsuccesful	Somewhat unsuccesful	5	5	5	3	3	3	5	4	4	5	4	2	3	4	NULL	5
322	I am employed / contracted / freelance	NULL	NULL	Life Sciences;Humanities / Social Sciences	Academia / university	Postdoc / Research Associate	No	Full-time fixed term / contract	1-2 years	NULL	Mostly human participants	31-4 hours	Had a conversation with you about your career aspirations;Supported you with personal issues;Supported your wellbeing;Provided expert advice;Conducted a formal appraisal	6	6	4	1	2	4	4	5	Somewhat important	Somewhat important	Extremely important	Extremely important	Somewhat successful	Somewhat successful	Somewhat successful	Neutral	Somewhat unsuccesful	Somewhat unsuccesful	Neutral	Somewhat unsuccesful	7	6	2	4	5	5	7	6	4	4	3	1	1	7	6-1 years	5
323	I am a student	NULL	NULL	Life Sciences	NULL	NULL	NULL	NULL	NULL	Doctoral degree (PhD/DPhil/MD)	NULL	41-5 hours	Had a conversation with you about your career aspirations;Discussed your performance;Noted your achievements;Provided expert advice	5	6	4	3	7	4	2	2	Extremely important	Extremely important	Extremely important	Extremely important	Somewhat successful	Neutral	Somewhat successful	Neutral	Somewhat unsuccesful	Somewhat unsuccesful	Somewhat unsuccesful	Neutral	5	4	6	4	2	4	4	3	4	2	5	2	2	4	NULL	6
324	I am a student	NULL	NULL	Life Sciences	NULL	NULL	NULL	NULL	NULL	Doctoral degree (PhD/DPhil/MD)	NULL	41-5 hours	Discussed your performance;Noted your achievements;Offered you training to support your skill development;Supported your wellbeing;Conducted a formal appraisal	7	7	6	2	6	2	2	1	Extremely important	Extremely important	Extremely important	Extremely important	Extremely successful	Extremely successful	Somewhat successful	Somewhat successful	Somewhat successful	Neutral	Somewhat successful	Somewhat successful	5	5	5	5	6	3	5	6	4	2	4	5	3	6	NULL	5
325	I am employed / contracted / freelance	NULL	NULL	Life Sciences	Academia / university	Postdoc / Research Associate	No	Full-time fixed term / contract	3-5 years	NULL	Mostly wet lab – based on experimental equipment and reagents	31-4 hours	Had a conversation with you about your career aspirations;Discussed your performance;Noted your achievements;Offered you training to support your skill development;Provided expert advice	6	7	6	3	7	3	4	3	Somewhat important	Extremely important	Somewhat important	Extremely important	Somewhat unsuccesful	Somewhat unsuccesful	Somewhat successful	Somewhat unsuccesful	Somewhat unsuccesful	Somewhat unsuccesful	Somewhat unsuccesful	Somewhat unsuccesful	3	3	4	6	6	5	6	6	6	3	4	3	3	4	6-1 years	3
326	I am a student	NULL	NULL	Life Sciences	NULL	NULL	NULL	NULL	NULL	Doctoral degree (PhD/DPhil/MD)	NULL	51-6 hours	None of the above	5	1	1	7	5	4	2	5	Extremely important	Extremely important	Somewhat important	Somewhat important	Somewhat unsuccesful	Somewhat unsuccesful	Somewhat unsuccesful	Somewhat unsuccesful	Somewhat successful	Somewhat successful	Somewhat successful	Somewhat successful	4	5	5	3	6	4	6	4	5	1	2	2	2	3	NULL	5
327	I am employed / contracted / freelance	NULL	NULL	Life Sciences	Academia / university	Postdoc / Research Associate	Yes, I manage 1 person	Full-time permanent	NULL	NULL	Mostly human participants	41-5 hours	Had a conversation with you about your career aspirations;Provided career advice and guidance;Noted your achievements;Provided expert advice	6	2	2	7	6	2	4	3	Extremely important	Extremely important	Extremely important	Extremely important	Somewhat successful	Somewhat successful	Somewhat successful	Neutral	Neutral	Somewhat successful	Somewhat successful	Somewhat successful	6	6	6	5	7	6	5	7	4	6	6	3	3	6	3-5 years	4
328	I am a student	NULL	NULL	Life Sciences	NULL	NULL	NULL	NULL	NULL	Doctoral degree (PhD/DPhil/MD)	NULL	41-5 hours	Had a conversation with you about your career aspirations;Provided career advice and guidance;Provided expert advice;Discussed alternative career options	6	1	2	6	4	2	2	2	Extremely important	Extremely important	Extremely important	Extremely important	Extremely successful	Somewhat unsuccesful	Somewhat successful	Somewhat successful	Somewhat unsuccesful	Extemely unsuccesful	Somewhat successful	Extemely unsuccesful	1	5	3	5	6	7	6	7	3	2	5	2	2	8	NULL	3
329	I am employed / contracted / freelance	NULL	NULL	Life Sciences	Academia / university	Independent Fellow	Yes, I manage multiple people	Full-time fixed term / contract	3-5 years	NULL	Mostly computational	51-6 hours	Had a conversation with you about your career aspirations;Discussed your performance;Provided an example of appropriate ethical codes;Noted your achievements;Offered you training to support your skill development;Provided an example of appropriate research standards;Supported you with personal issues;Conducted a formal appraisal						5	4	5	Extremely important	Somewhat important	Extremely important	Extremely important	Extremely successful	Somewhat successful	Somewhat successful	Somewhat successful	Extremely successful	Extremely successful	Somewhat successful	Somewhat successful	5	5	6	5	3	2	2	6	5	5	5	3	3	5	6-1 years	6
330	I am employed / contracted / freelance	NULL	NULL	Physical Sciences;Humanities / Social Sciences	Academia / university	Research Support Staff	No	Full-time permanent	NULL	NULL	Mostly wet lab – based on experimental equipment and reagents	31-4 hours	Had a conversation with you about your career aspirations;Provided career advice and guidance;Discussed your performance;Provided an example of appropriate ethical codes;Noted your achievements;Offered you training to support your skill development;Connected you to others within or outside your field;Supported your wellbeing;Provided expert advice;Conducted a formal appraisal;Discussed alternativ…						6	7	5	Extremely important	Extremely important	Extremely important	Extremely important	Extremely successful	Neutral	Extremely successful	Extremely successful	Somewhat successful	Neutral	Somewhat successful	Somewhat successful	6	6	7	4	4	2	5	5	3	5	5	6	3	7	6-1 years	6
331	I am a student	NULL	NULL	Humanities / Social Sciences	NULL	NULL	NULL	NULL	NULL	Doctoral degree (PhD/DPhil/MD)	NULL	41-5 hours	Had a conversation with you about your career aspirations;Provided career advice and guidance;Discussed your performance;Noted your achievements	6	4	4	4	5	3	4	1	Somewhat important	Extremely important	Extremely important	Extremely important	Extremely successful	Somewhat successful	Neutral	Neutral	Somewhat successful	Somewhat unsuccesful	Somewhat unsuccesful	Neutral	2	2	3	4	5	4	4	5	5	1	2	5	5	4	NULL	5
332	I am employed / contracted / freelance	NULL	NULL	Life Sciences;Physical Sciences	Not-for-profit research institute (including charity funded, research council funded etc)	Director	Yes, I manage multiple people	Full-time permanent	NULL	NULL	Mostly wet lab – based on experimental equipment and reagents	41-5 hours	Had a conversation with you about your career aspirations;Noted your achievements;Connected you to others within or outside your field;Provided expert advice						6	4	7	Extremely important	Extremely important	Extremely important	Extremely important	Somewhat successful	Extremely successful	Somewhat successful	Somewhat successful	Somewhat successful	Somewhat successful	Somewhat successful	Somewhat successful	5	6	7	7	4	3	2	7	4	7	7	4	4	5	21-3 years	4
333	I am employed / contracted / freelance	NULL	NULL	Humanities / Social Sciences	Academia / university	Professor	Yes, I manage multiple people	Full-time permanent	NULL	NULL	Mostly human participants	41-5 hours	None of the above						2	1	1	Somewhat important	Extremely important	Extremely important	Extremely important	Somewhat successful	Neutral	Somewhat successful	Somewhat successful	Extemely unsuccesful	Extemely unsuccesful	Neutral	Somewhat unsuccesful	4	2	2	1	7	7	7	1	7	1	1	5	6	4	21-3 years	2
334	I am employed / contracted / freelance	NULL	NULL	Life Sciences	Academia / university	Postdoc / Research Associate	No	Full-time fixed term / contract	3-5 years	NULL	Mostly wet lab – based on experimental equipment and reagents	31-4 hours	Connected you to others within or outside your field;Provided expert advice	4	4	5	3	4	4	4	2	Extremely important	Extremely important	Extremely important	Extremely important	Somewhat successful	Somewhat successful	Somewhat successful	Somewhat unsuccesful	Neutral	Somewhat successful	Somewhat successful	Somewhat unsuccesful	3	3	4	4	5	5	6	5	5	4	4	2	2	8	6-1 years	2
335	I am a student	NULL	NULL	Life Sciences	NULL	NULL	NULL	NULL	NULL	Doctoral degree (PhD/DPhil/MD)	NULL	51-6 hours	Noted your achievements	3	6	4	2	7	2	3	1	Somewhat important	Extremely important	Extremely important	Somewhat important	Somewhat unsuccesful	Somewhat unsuccesful	Neutral	Somewhat successful	Somewhat successful	Extemely unsuccesful	Neutral	Somewhat successful	4	3	3	5	6	8	7	8	4	1	2	6	4	5	NULL	6
336	I am employed / contracted / freelance	NULL	NULL	Life Sciences;Physical Sciences	Academia / university	Professor	Yes, I manage multiple people	Full-time permanent	NULL	NULL	Mostly primary sources / artefacts	61-7 hours	Discussed your performance;Noted your achievements;Supported you with personal issues;Supported your wellbeing;Provided expert advice;Conducted a formal appraisal						3	4	4	Extremely important	Extremely important	Extremely important	Somewhat important	Somewhat successful	Somewhat successful	Extremely successful	Extremely successful	Somewhat unsuccesful	Somewhat unsuccesful	Neutral	Neutral	1	5	5	4	3	2	6	7	5	4	3	5	7	4	21-3 years	7
337	I am employed / contracted / freelance	NULL	NULL	Humanities / Social Sciences	Academia / university	Research Technician / Officer	No	Part-time permanent	NULL	NULL	Mostly human participants	11-2 hours	Noted your achievements						3	2	1	Extremely important	Extremely important	Extremely important	Extremely important	Somewhat successful	Extemely unsuccesful	Neutral	Extemely unsuccesful	Somewhat successful	Extemely unsuccesful	Somewhat unsuccesful	Extemely unsuccesful	1	2	3	2	7	7	6	4	6	3	5	3	4	1	11-2 years	6
338	I am employed / contracted / freelance	NULL	NULL	Life Sciences	Academia / university	Professor	Yes, I manage multiple people	Full-time permanent	NULL	NULL	Mostly wet lab – based on experimental equipment and reagents	41-5 hours	Supported you with personal issues;Supported your wellbeing						5	6	6	Neutral	Extremely important	Extremely important	Extremely important	Extremely successful	Extremely successful	Extremely successful	Extremely successful	Neutral	Somewhat successful	Extremely successful	Somewhat successful	5	6	6	5	5	1	1	7	5	6	7	5	1	6	3+ years	6
339	I am a student	NULL	NULL	Life Sciences	NULL	NULL	NULL	NULL	NULL	Doctoral degree (PhD/DPhil/MD)	NULL	31-4 hours	None of the above	4	1	4	4	1	1	1	1	Extremely important	Extremely important	Extremely important	Extremely important	Somewhat unsuccesful	Neutral	Extemely unsuccesful	Extemely unsuccesful	Somewhat successful	Neutral	Extemely unsuccesful	Somewhat successful	1	1	1	8	8	4	4	7	7	1	1	4	7	1	NULL	7
340	I am a student	NULL	NULL	Humanities / Social Sciences	NULL	NULL	NULL	NULL	NULL	Doctoral degree (PhD/DPhil/MD)	NULL	31-4 hours	Discussed your performance;Noted your achievements;Provided an example of appropriate research standards;Connected you to others within or outside your field;Supported you with personal issues;Supported your wellbeing;Provided expert advice	6	6	6	2	5	2	2	1	Somewhat important	Extremely important	Extremely important	Extremely important	Extremely successful	Somewhat successful	Extremely successful	Neutral	Somewhat unsuccesful	Somewhat unsuccesful	Somewhat unsuccesful	Somewhat unsuccesful	2	5	5	4	6	5	6	5	3	5	5	6	6	3	NULL	5
341	I am taking a career-break / on leave (e.g. parental)	NULL	NULL	Life Sciences	Academia / university	Group Leader	NULL	NULL	NULL	NULL	NULL	NULL	NULL									Extremely important	Extremely important	Extremely important	Extremely important	NULL	NULL	NULL	NULL	NULL	NULL	NULL	NULL	5	3	4	4	5	2	3	4	6	3	3	5	5	7	11-2 years	5
342	I am employed / contracted / freelance	NULL	NULL	Life Sciences	Academia / university	Head of Department	Yes, I manage multiple people	Full-time permanent	NULL	NULL	Mostly wet lab – based on experimental equipment and reagents	51-6 hours	Had a conversation with you about your career aspirations;Provided career advice and guidance;Discussed your performance;Noted your achievements;Offered you training to support your skill development;Supported your wellbeing;Conducted a formal appraisal;Discussed alternative career options;Requested your feedback on their management of you						5	6	6	Somewhat important	Extremely important	Extremely important	Extremely important	Somewhat successful	Extremely successful	Extremely successful	Extremely successful	Neutral	Somewhat successful	Somewhat successful	Somewhat successful	4	6	6	5	2	2	2	6	2	6	6	5	2	6	21-3 years	5
343	I am employed / contracted / freelance	NULL	NULL	Physical Sciences	Academia / university	Research Support Staff	No	Full-time fixed term / contract	1-2 years	NULL	Mostly computational	41-5 hours	Conducted a formal appraisal						4	2	2	Somewhat important	Extremely important	Extremely important	Extremely important	Somewhat unsuccesful	Somewhat unsuccesful	Somewhat unsuccesful	Somewhat unsuccesful	Somewhat successful	Somewhat successful	Neutral	Somewhat successful	6	3	2	4	6	7	7	4	6	4	8	8	8	6	6-1 years	3
344	I am a student	NULL	NULL	Life Sciences;Humanities / Social Sciences	NULL	NULL	NULL	NULL	NULL	Doctoral degree (PhD/DPhil/MD)	NULL	31-4 hours	Had a conversation with you about your career aspirations;Discussed your performance;Noted your achievements;Offered you training to support your skill development;Provided an example of appropriate research standards;Connected you to others within or outside your field;Supported you with personal issues;Supported your wellbeing;Provided expert advice	7	7	7	1	7	6	3	4	Extremely important	Extremely important	Somewhat important	Extremely important	Somewhat successful	Extemely unsuccesful	Somewhat successful	Somewhat successful	I don't know	Somewhat unsuccesful	Somewhat successful	Somewhat successful	4	3	6	8	8	4	5	6	4	6	5	4	3	8	NULL	5
345	I used to be part of the research community, but no longer am	I'm no longer interested in a research-related career;I wanted to apply my skills elsewhere;Too difficult to find a job / insecure career path;For career progression / development;For better compensation / salary;For a better work-life balance;It was impacting on my wellbeing and mental health	Less than 1 year ago	Life Sciences	NULL	NULL	NULL	NULL	NULL	NULL	NULL	NULL	NULL									Extremely important	Extremely important	Extremely important	Extremely important	NULL	NULL	NULL	NULL	NULL	NULL	NULL	NULL	5	4	3	4	6	3	5	6	4	2	3	1	4	8	NULL	3
346	I am employed / contracted / freelance	NULL	NULL	Life Sciences;Humanities / Social Sciences	Not-for-profit research institute (including charity funded, research council funded etc)	Research Support Staff	Other - supervise students	Full-time permanent	NULL	NULL	Mostly human participants	41-5 hours	Had a conversation with you about your career aspirations;Discussed your performance;Offered you training to support your skill development;Connected you to others within or outside your field;Supported you with personal issues;Supported your wellbeing;Conducted a formal appraisal						4	3	5	Extremely important	Extremely important	Extremely important	Extremely important	Somewhat successful	Somewhat successful	Neutral	Somewhat successful	Somewhat unsuccesful	Somewhat unsuccesful	Neutral	Somewhat successful	3	4	7	4	7	5	5	4	4	7	4	4	5	1	3-5 years	4
347	I am employed / contracted / freelance	NULL	NULL	Life Sciences	Academia / university	Professor	Yes, I manage multiple people	Full-time permanent	NULL	NULL	Mostly human participants	More than 8 hours	None of the above						4	3	3	Somewhat important	Somewhat important	Extremely important	Extremely important	Somewhat successful	Extremely successful	Somewhat successful	Somewhat successful	Somewhat unsuccesful	Neutral	Neutral	Neutral	4	4	4	5	5	4	5	5	2	5	5	3	4	5	6-1 years	4
348	I am employed / contracted / freelance	NULL	NULL	Life Sciences	Academia / university	Professor	Yes, I manage 1 person	Full-time permanent	NULL	NULL	Mostly human participants	41-5 hours	Provided career advice and guidance;Discussed your performance;Connected you to others within or outside your field;Provided expert advice						6	6	6	Somewhat important	Extremely important	Extremely important	Extremely important	Somewhat successful	Somewhat successful	Extremely successful	Somewhat successful	Extremely successful	Somewhat successful	Extremely successful	Somewhat successful	6	7	6	6	4	2	3	7	2	6	6	5	1	7	6-1 years	6
349	I am retired	NULL	NULL	Humanities / Social Sciences	NULL	NULL	NULL	NULL	NULL	NULL	NULL	NULL	NULL									Extremely important	Extremely important	Extremely important	Extremely important	NULL	NULL	NULL	NULL	NULL	NULL	NULL	NULL															NULL
350	I am employed / contracted / freelance	NULL	NULL	Life Sciences	Academia / university	Reader	Yes, I manage multiple people	Full-time permanent	NULL	NULL	Mostly wet lab – based on experimental equipment and reagents	41-5 hours	Had a conversation with you about your career aspirations;Provided career advice and guidance;Discussed your performance;Connected you to others within or outside your field;Provided expert advice;Conducted a formal appraisal						5	6	4	Extremely important	Somewhat important	Extremely important	Extremely important	Neutral	Somewhat successful	Somewhat successful	Neutral	Somewhat successful	Somewhat successful	Somewhat successful	Somewhat unsuccesful	2	6	7	6	6	3	5	6	2	6	6	5	3	5	11-2 years	6
351	I am employed / contracted / freelance	NULL	NULL	Life Sciences	Academia / university	Postdoc / Research Associate	Yes, I manage 1 person	Full-time fixed term / contract	1-2 years	NULL	Mostly wet lab – based on experimental equipment and reagents	41-5 hours	Had a conversation with you about your career aspirations;Provided career advice and guidance;Discussed your performance;Noted your achievements;Offered you training to support your skill development;Connected you to others within or outside your field;Supported you with personal issues;Provided expert advice	1	4	7	6	6	3	4	1	Extremely important	Extremely important	Extremely important	Extremely important	Somewhat successful	Somewhat successful	Somewhat successful	Extremely successful	Somewhat unsuccesful	Somewhat unsuccesful	Somewhat unsuccesful	Somewhat unsuccesful	4	5	4	3	7	5	4	4	7	1	3	5	7	6	3-5 years	4
352	I am employed / contracted / freelance	NULL	NULL	Life Sciences	Not-for-profit research institute (including charity funded, research council funded etc)	Other	No	Full-time fixed term / contract	1-2 years	NULL	Mostly wet lab – based on experimental equipment and reagents	31-4 hours	Had a conversation with you about your career aspirations;Discussed your performance;Noted your achievements;Conducted a formal appraisal						4	4	2	Extremely important	Extremely important	Extremely important	Extremely important	Somewhat successful	Somewhat successful	Somewhat successful	Somewhat unsuccesful	Neutral	Somewhat successful	Somewhat unsuccesful	Somewhat unsuccesful	7	7	5	8	2	2	4	4	4	2	4	1	2	3	11-2 years	5
353	I am employed / contracted / freelance	NULL	NULL	Life Sciences	Academia / university	Postdoc / Research Associate	No	Full-time fixed term / contract	3-5 years	NULL	Mostly wet lab – based on experimental equipment and reagents	31-4 hours	Connected you to others within or outside your field	5	6	6	6	6	2	3	1	Extremely important	Somewhat important	Extremely important	Somewhat important	Somewhat unsuccesful	Neutral	Somewhat unsuccesful	Somewhat unsuccesful	Somewhat successful	Somewhat successful	Somewhat successful	Neutral	5	5	5	3	4	5	7	4	5	3	3	4	3	8	6-1 years	5
354	I am a student;I am employed / contracted / freelance	NULL	NULL	Humanities / Social Sciences	Academia / university	Postdoc / Research Associate	No	Part-time permanent	NULL	Doctoral degree (PhD/DPhil/MD)	Mostly computational	61-7 hours	Provided career advice and guidance;Noted your achievements;Supported you with personal issues;Provided expert advice	6	2	5	2	7	5	1	1	Extremely important	Extremely important	Extremely important	Extremely important	Extemely unsuccesful	Extemely unsuccesful	Somewhat successful	Extemely unsuccesful	Extemely unsuccesful	Extemely unsuccesful	Extremely successful	Extemely unsuccesful	1	1	1	1	7	7	7	7	7	1	5	5	7	5	11-2 years	1
355	I am employed / contracted / freelance	NULL	NULL	Life Sciences	Academia / university	Lecturer / Assistant Professor	Yes, I manage multiple people	Full-time permanent	NULL	NULL	Mostly human participants	41-5 hours	Discussed your performance;Noted your achievements;Conducted a formal appraisal						5	3	4	Somewhat unimportant	Somewhat important	Neutral	Somewhat important	Neutral	Neutral	Neutral	Neutral	Neutral	Neutral	Neutral	Neutral	1	5	5	3	4	6	6	4	7	4	4	7	7	5	11-2 years	3
356	I am employed / contracted / freelance	NULL	NULL	Life Sciences	Academia / university	Professor	Yes, I manage multiple people	Full-time permanent	NULL	NULL	In the field	41-5 hours	Had a conversation with you about your career aspirations;Discussed your performance;Noted your achievements;Supported you with personal issues;Conducted a formal appraisal						2	1	1	Somewhat important	Extremely important	Somewhat important	Extremely important	Somewhat successful	Somewhat successful	Neutral	Somewhat successful	Neutral	Somewhat unsuccesful	Somewhat unsuccesful	Neutral	3	2	2	3	7	7	5	3	6	3	4	5	7	3	3+ years	6
357	I am employed / contracted / freelance	NULL	NULL	Life Sciences	Life sciences industry (pharmaceuticals, biotechnology, medical technology and consumer healthcare)	Other - Researcher	No	Full-time fixed term / contract	1-2 years	NULL	Mostly human participants	41-5 hours	Discussed your performance;Provided an example of appropriate ethical codes;Noted your achievements;Offered you training to support your skill development;Provided an example of appropriate research standards;Provided expert advice						5	7	3	Extremely important	Extremely important	Somewhat important	Extremely important	Somewhat successful	Neutral	Extremely successful	Neutral	Somewhat successful	Neutral	Somewhat successful	Neutral	7	4	2	4	2	1	2	7	3	5	3	2	1	8	3-5 years	7
358	I am employed / contracted / freelance	NULL	NULL	Life Sciences	Academia / university	Professor	Yes, I manage multiple people	Full-time permanent	NULL	NULL	Mostly wet lab – based on experimental equipment and reagents	41-5 hours	Not applicable						6	5	6	Extremely important	Extremely important	Extremely important	Extremely important	Somewhat successful	Somewhat successful	Somewhat successful	Somewhat successful	Somewhat successful	Somewhat successful	Somewhat successful	Somewhat successful	6	6	6	5	3	3	5	5	3	6	6	5	4	5	3+ years	6
359	I used to be part of the research community, but no longer am	I wanted to apply my skills elsewhere	5+ years ago	NULL	NULL	NULL	NULL	NULL	NULL	NULL	NULL	NULL	NULL									NULL	NULL	NULL	NULL	NULL	NULL	NULL	NULL	NULL	NULL	NULL	NULL															NULL
360	I am employed / contracted / freelance	NULL	NULL	Life Sciences	Academia / university	Postdoc / Research Associate	No	Full-time permanent	NULL	NULL	Mostly computational	41-5 hours	Had a conversation with you about your career aspirations;Provided career advice and guidance;Noted your achievements;Connected you to others within or outside your field;Provided expert advice	7	7	7	1	7	3	4	3	Somewhat important	Extremely important	Extremely important	Extremely important	Neutral	Somewhat unsuccesful	Extremely successful	Somewhat successful	Neutral	Somewhat unsuccesful	Neutral	Somewhat unsuccesful	3	5	7	5	4	2	4	7	4	2	4	1	2	5	6-1 years	6
361	I am employed / contracted / freelance	NULL	NULL	Life Sciences	Academia / university	Senior Lecturer / Associate Professor	Yes, I manage multiple people	Full-time permanent	NULL	NULL	Mostly human participants	71-8 hours	Noted your achievements;Conducted a formal appraisal						5	5	7	Extremely important	Extremely important	Extremely important	Extremely important	Somewhat successful	Extremely successful	Somewhat successful	Somewhat successful	Somewhat successful	Somewhat successful	Somewhat successful	Somewhat successful	5	6	5	6	6	7	5	5	7	6	6	5	3	3	11-2 years	3
362	I used to be part of the research community, but no longer am	My contract ended / my role was terminated;Bullying and harassment;Discrimination	Less than 1 year ago	Life Sciences	NULL	NULL	NULL	NULL	NULL	NULL	NULL	NULL	NULL									Extremely important	Somewhat important	Extremely important	Extremely important	NULL	NULL	NULL	NULL	NULL	NULL	NULL	NULL	1	2	2	1	6	7	5	4	7	1	1	7	7	1	NULL	1
363	I am employed / contracted / freelance	NULL	NULL	Life Sciences	Academia / university	Lecturer / Assistant Professor	Yes, I manage 1 person	Full-time permanent	NULL	NULL	Mostly human participants	41-5 hours	Had a conversation with you about your career aspirations;Provided career advice and guidance;Discussed your performance;Noted your achievements;Offered you training to support your skill development;Connected you to others within or outside your field;Supported you with personal issues;Supported your wellbeing;Provided expert advice;Conducted a formal appraisal						6	4	5	Somewhat important	Extremely important	Extremely important	Somewhat important	Neutral	Extremely successful	Somewhat successful	Somewhat successful	Somewhat unsuccesful	Extremely successful	Somewhat successful	Neutral	7	7	6	7	3	5	6	7	4	5	7	2	4	7	11-2 years	6
364	I used to be part of the research community, but no longer am	I wanted to apply my skills elsewhere;For career progression / development;For better compensation / salary;For a better work-life balance	Less than 1 year ago	Life Sciences	NULL	NULL	NULL	NULL	NULL	NULL	NULL	NULL	NULL									Extremely important	Extremely important	Extremely important	Extremely important	NULL	NULL	NULL	NULL	NULL	NULL	NULL	NULL	3	3	1	7	1	7	7	1	7	1	2	2	2	1	NULL	1
365	I am employed / contracted / freelance	NULL	NULL	Life Sciences	Academia / university	Research Support Staff	No	Full-time permanent	NULL	NULL	Mostly wet lab – based on experimental equipment and reagents	31-4 hours	Had a conversation with you about your career aspirations;Provided career advice and guidance;Discussed your performance;Noted your achievements;Offered you training to support your skill development						5	5	3	Extremely important	Somewhat important	Extremely important	Somewhat important	Somewhat successful	Extremely successful	Extremely successful	Somewhat successful	Somewhat unsuccesful	Somewhat unsuccesful	Somewhat successful	Neutral	6	5	6	3	5	7	5	6	5	6	3	7	3	7	6-1 years	5
366	I am employed / contracted / freelance	NULL	NULL	Life Sciences;Humanities / Social Sciences	Academia / university	Postdoc / Research Associate	No	Full-time fixed term / contract	1-2 years	NULL	Mostly computational	41-5 hours	Had a conversation with you about your career aspirations;Discussed your performance;Noted your achievements;Supported you with personal issues;Supported your wellbeing;Provided expert advice;Conducted a formal appraisal;Discussed alternative career options	2	6	5	2	6	2	1	1	Neutral	Extremely important	Extremely important	Extremely important	Neutral	Extremely successful	Neutral	Neutral	Somewhat unsuccesful	Neutral	Somewhat unsuccesful	Extemely unsuccesful	3	4	5	4	7	6	5	3	7	4	4	2	2	5	11-2 years	4
367	I am employed / contracted / freelance	NULL	NULL	Life Sciences	Not-for-profit research institute (including charity funded, research council funded etc)	Postdoc / Research Associate	Yes, I manage multiple people	Full-time fixed term / contract	3-5 years	NULL	Mostly wet lab – based on experimental equipment and reagents	41-5 hours	None of the above	1	7	7	2	7	2	1	1	Extremely important	Extremely important	Extremely important	Extremely important	Somewhat successful	Somewhat successful	Somewhat successful	Neutral	Extemely unsuccesful	Extemely unsuccesful	Extemely unsuccesful	Extemely unsuccesful	4	2	4	4	5	5	7	2	5	1	6	4	6	1	6-1 years	6
368	I am employed / contracted / freelance	NULL	NULL	Life Sciences;Physical Sciences	Academia / university	Group Leader	Yes, I manage multiple people	Full-time fixed term / contract	3-5 years	NULL	Mostly wet lab – based on experimental equipment and reagents	41-5 hours	Had a conversation with you about your career aspirations;Provided career advice and guidance;Discussed your performance;Noted your achievements;Connected you to others within or outside your field;Supported you with personal issues;Conducted a formal appraisal						1	1	2	Extremely important	Extremely important	Extremely important	Extremely important	Extremely successful	Somewhat successful	Extremely successful	Somewhat successful	Somewhat unsuccesful	Somewhat unsuccesful	Neutral	Somewhat unsuccesful	3	5	5	6	4	4	4	5	7	4	4	3	4	6	11-2 years	7
369	I am a student	NULL	NULL	Life Sciences	NULL	NULL	NULL	NULL	NULL	Doctoral degree (PhD/DPhil/MD)	NULL	41-5 hours	Had a conversation with you about your career aspirations;Provided career advice and guidance;Discussed your performance;Provided an example of appropriate ethical codes;Noted your achievements;Offered you training to support your skill development;Provided an example of appropriate research standards;Connected you to others within or outside your field;Supported you with personal issues;Supporte…	7	7	7	3	6	5	6	5	Somewhat important	Extremely important	Extremely important	Extremely important	Extremely successful	Extremely successful	Extremely successful	Somewhat successful	Somewhat successful	Somewhat successful	Somewhat successful	Extremely successful	7	7	7	7	1	2	5	5	3	5	7	3	2	5	NULL	6
370	I am retired	NULL	NULL	Life Sciences	NULL	NULL	NULL	NULL	NULL	NULL	NULL	NULL	NULL									Extremely important	Somewhat important	Extremely important	Somewhat important	NULL	NULL	NULL	NULL	NULL	NULL	NULL	NULL															NULL
371	I am employed / contracted / freelance	NULL	NULL	Life Sciences;Physical Sciences	Academia / university	Professor	Yes, I manage multiple people	Full-time permanent	NULL	NULL	Mostly computational	51-6 hours	Provided expert advice						4	3	2	Extremely important	Extremely important	Extremely important	Extremely important	Somewhat successful	Somewhat successful	Somewhat successful	Somewhat successful	Somewhat unsuccesful	Somewhat unsuccesful	Somewhat unsuccesful	Somewhat unsuccesful	4	4	3	4	5	5	5	5	4	2	3	6	5	2	11-2 years	2
372	I am employed / contracted / freelance	NULL	NULL	Life Sciences	Academia / university	Postdoc / Research Associate	No	Full-time fixed term / contract	Less than 1 year	NULL	Mostly wet lab – based on experimental equipment and reagents	41-5 hours	None of the above	3	3	2	5	3	1	2	1	Somewhat important	Extremely important	Extremely important	Extremely important	Neutral	Somewhat successful	Neutral	Extemely unsuccesful	Somewhat unsuccesful	Somewhat successful	Somewhat unsuccesful	Extemely unsuccesful	1	1	3	4	7	6	7	3	7	2	3	6	7	2	6-1 years	3
373	I am employed / contracted / freelance	NULL	NULL	Life Sciences	Academia / university	Lecturer / Assistant Professor	Yes, I manage multiple people	Full-time permanent	NULL	NULL	Mostly computational	41-5 hours	Had a conversation with you about your career aspirations;Provided career advice and guidance;Noted your achievements;Provided an example of appropriate research standards;Connected you to others within or outside your field;Supported you with personal issues;Supported your wellbeing;Provided expert advice;Conducted a formal appraisal						5	5	6	Extremely important	Extremely important	Extremely important	Somewhat important	Extremely successful	Extremely successful	Extremely successful	Extremely successful	Somewhat successful	Somewhat successful	Somewhat successful	Somewhat successful	5	7	6	4	2	2	5	7	2	6	7	3	3	6	11-2 years	6
374	I am employed / contracted / freelance	NULL	NULL	Life Sciences	Academia / university	Reader	Yes, I manage multiple people	Full-time permanent	NULL	NULL	Mostly computational	41-5 hours	Discussed your performance;Noted your achievements;Conducted a formal appraisal						1	4	4	Somewhat unimportant	Somewhat important	Somewhat important	Somewhat important	I don't know	I don't know	I don't know	I don't know	Extemely unsuccesful	Extemely unsuccesful	Somewhat unsuccesful	Somewhat successful	3	7	6	3	1	3	5	6	3	3	6	4	6	7	11-2 years	6
375	I am employed / contracted / freelance	NULL	NULL	Life Sciences	Academia / university	Professor	Yes, I manage multiple people	Part-time fixed term / contract	NULL	NULL	Mostly human participants	21-3 hours	Noted your achievements;Conducted a formal appraisal						4	3	3	Extremely important	Extremely important	Extremely important	Extremely important	Somewhat successful	Somewhat successful	Extremely successful	Somewhat successful	Somewhat unsuccesful	Somewhat unsuccesful	Somewhat unsuccesful	Somewhat unsuccesful	3	4	4	4	4	5	5	4	5	4	3	5	4	3	3+ years	6
376	I am employed / contracted / freelance	NULL	NULL	Life Sciences	Academia / university	Postdoc / Research Associate	No	Full-time fixed term / contract	1-2 years	NULL	Mostly computational	31-4 hours	Had a conversation with you about your career aspirations;Provided career advice and guidance;Discussed your performance;Noted your achievements;Offered you training to support your skill development;Connected you to others within or outside your field	5	7	7	2	5	2	4	4	Somewhat important	Extremely important	Somewhat important	Somewhat unimportant	Neutral	Extremely successful	Neutral	Extemely unsuccesful	Somewhat successful	Somewhat successful	Neutral	Somewhat unsuccesful	6	3	3	2	6	5	4	5	4	3	5	2	2	5	3-5 years	5
377	I am employed / contracted / freelance	NULL	NULL	Life Sciences	Academia / university	Head of Department	Yes, I manage multiple people	Full-time permanent	NULL	NULL	Other - a mixture of above	51-6 hours	Conducted a formal appraisal						1	1	2	Somewhat important	Extremely important	Extremely important	Extremely important	Somewhat successful	Somewhat successful	Somewhat successful	Neutral	Somewhat unsuccesful	Extemely unsuccesful	Somewhat unsuccesful	Extemely unsuccesful	2	2	1	4	2	7	7	1	7	1	2	5	5	5	21-3 years	1
378	I am employed / contracted / freelance	NULL	NULL	Life Sciences	Academia / university	Professor	Yes, I manage multiple people	Full-time permanent	NULL	NULL	Mostly computational	51-6 hours	Discussed your performance;Supported you with personal issues;Provided expert advice;Conducted a formal appraisal						1	2	1	Extremely important	Extremely important	Somewhat important	Extremely important	Somewhat successful	Extremely successful	Neutral	Extemely unsuccesful	Extemely unsuccesful	Extemely unsuccesful	Extemely unsuccesful	Extemely unsuccesful	1	3	5	1	7	6	7	4	7	1	1	7	7	1	21-3 years	2
379	I am employed / contracted / freelance	NULL	NULL	Physical Sciences	Academia / university	Lecturer / Assistant Professor	Yes, I manage multiple people	Full-time permanent	NULL	NULL	Mostly wet lab – based on experimental equipment and reagents	61-7 hours	Discussed your performance;Noted your achievements;Offered you training to support your skill development;Conducted a formal appraisal						5	5	6	Extremely important	Extremely important	Extremely important	Somewhat important	Somewhat successful	Extremely successful	Extremely successful	Extremely successful	Neutral	Somewhat successful	Neutral	Somewhat successful	3	5	4	5	6	6	5	5	6	4	5	3	3	5	11-2 years	4
380	I am employed / contracted / freelance	NULL	NULL	Life Sciences;Humanities / Social Sciences	Academia / university	Research Support Staff	No	Full-time fixed term / contract	1-2 years	NULL	Mostly computational	31-4 hours	Had a conversation with you about your career aspirations;Provided career advice and guidance;Discussed your performance;Noted your achievements;Offered you training to support your skill development;Connected you to others within or outside your field;Supported your wellbeing;Provided expert advice						7	7	7	Somewhat important	Somewhat important	Extremely important	Extremely important	Extremely successful	Extremely successful	Extremely successful	Extremely successful	Neutral	Somewhat successful	Somewhat successful	Neutral	6	7	6	5	2	1	1	6	2	5	7	4	3	4	Less than 1 year	6
381	I am employed / contracted / freelance	NULL	NULL	Life Sciences	Academia / university	Postdoc / Research Associate	No	Full-time fixed term / contract	3-5 years	NULL	Mostly computational	41-5 hours	Had a conversation with you about your career aspirations;Provided career advice and guidance;Discussed your performance;Offered you training to support your skill development;Supported your wellbeing;Discussed alternative career options	7		6	6	6	4	8	6	Extremely important	Somewhat important	Extremely important	Extremely important	Somewhat successful	Extremely successful	Somewhat successful	Extremely successful	I don't know	Extremely successful	I don't know	I don't know	6	3	6	4	3	3	8	7	6	5	5	4	4	8	Less than 1 year	8
382	I am employed / contracted / freelance	NULL	NULL	Humanities / Social Sciences	Academia / university	Professor	Yes, I manage multiple people	Full-time permanent	NULL	NULL	Mostly human participants	61-7 hours	Conducted a formal appraisal						2	2	1	Somewhat unimportant	Somewhat important	Neutral	Somewhat important	Somewhat unsuccesful	Somewhat unsuccesful	Neutral	Somewhat unsuccesful	Somewhat unsuccesful	Somewhat successful	Neutral	Somewhat unsuccesful	5	3	2	4	6	4	6	4	7	3	6	5	5	1	21-3 years	3
383	I am employed / contracted / freelance	NULL	NULL	Life Sciences;Physical Sciences	Academia / university	Senior Lecturer / Associate Professor	Yes, I manage multiple people	Full-time fixed term / contract	5+ years	NULL	Mostly computational	51-6 hours	Had a conversation with you about your career aspirations;Provided career advice and guidance;Discussed your performance;Provided an example of appropriate research standards;Connected you to others within or outside your field;Conducted a formal appraisal						5	6	6	Extremely important	Somewhat important	Extremely important	Extremely important	Somewhat successful	Somewhat successful	Extremely successful	Somewhat successful	Somewhat successful	Somewhat unsuccesful	Extremely successful	Somewhat unsuccesful	4	5	5	5	3	6	3	5	6	4	5	5	5	6	6-1 years	5
384	I am employed / contracted / freelance	NULL	NULL	Life Sciences;Humanities / Social Sciences	Academia / university	Dean	Yes, I manage multiple people	Part-time permanent	NULL	NULL	Mostly human participants	41-5 hours	Had a conversation with you about your career aspirations;Provided career advice and guidance;Discussed your performance;Noted your achievements;Supported you with personal issues;Supported your wellbeing;Conducted a formal appraisal;Requested your feedback on their management of you						7	5	6	Extremely important	Extremely important	Extremely important	Extremely important	Somewhat successful	Somewhat successful	Somewhat successful	Somewhat successful	Extremely successful	Somewhat successful	Somewhat successful	Somewhat successful	5	5	6	5	3	6	6	5	2	7	6	6	2	6	3+ years	6
385	I am employed / contracted / freelance	NULL	NULL	Humanities / Social Sciences	Academia / university	Lecturer / Assistant Professor	No	Full-time fixed term / contract	3-5 years	NULL	Mostly human participants	31-4 hours	Had a conversation with you about your career aspirations;Discussed your performance;Noted your achievements;Conducted a formal appraisal						2	1	3	Somewhat important	Extremely important	Somewhat important	Extremely important	Somewhat successful	Somewhat unsuccesful	Somewhat successful	Somewhat unsuccesful	Neutral	Neutral	Somewhat successful	Neutral	4	2	2	3	6	3	5	5	5	2	6	7	7	3	6-1 years	2
386	I used to be part of the research community, but no longer am	Too difficult to find a job / insecure career path;For career progression / development;For better compensation / salary	5+ years ago	NULL	NULL	NULL	NULL	NULL	NULL	NULL	NULL	NULL	NULL									NULL	NULL	NULL	NULL	NULL	NULL	NULL	NULL	NULL	NULL	NULL	NULL															NULL
387	I am a student	NULL	NULL	Life Sciences	NULL	NULL	NULL	NULL	NULL	Doctoral degree (PhD/DPhil/MD)	NULL	41-5 hours	Supported your wellbeing;Provided expert advice	5	3	7	5	6	4	5	7	Somewhat important	Somewhat important	Extremely important	Extremely important	Extremely successful	Somewhat successful	Extremely successful	Somewhat successful	Extremely successful	Extremely successful	Extremely successful	Extremely successful	6	5	6	4	2	3	4	5	6	4	6	3	3	4	NULL	6
388	I am employed / contracted / freelance	NULL	NULL	Humanities / Social Sciences	Academia / university	Lecturer / Assistant Professor	No	Full-time permanent	NULL	NULL	Mostly human participants	41-5 hours	Discussed your performance						4	2	3	Somewhat important	Extremely important	Extremely important	Somewhat important	Somewhat unsuccesful	Neutral	Somewhat successful	Somewhat unsuccesful	Somewhat unsuccesful	Somewhat unsuccesful	Somewhat unsuccesful	Somewhat unsuccesful	3	2	2	3	6	6	7	4	4	3	4	6	6	4	6-1 years	5
389	I am a student	NULL	NULL	Other	NULL	NULL	NULL	NULL	NULL	Doctoral degree (PhD/DPhil/MD)	NULL	61-7 hours	Discussed your performance	2	6	6	1	7	5	5	4	Extremely important	Extremely important	Somewhat important	Extremely important	Somewhat unsuccesful	Somewhat successful	Somewhat successful	Somewhat unsuccesful	Somewhat successful	Somewhat unsuccesful	Somewhat successful	Somewhat unsuccesful	3	2	4	4	6	5	5	6	6	5	5	6	6	5	NULL	5
390	I am employed / contracted / freelance	NULL	NULL	Life Sciences	Academia / university	Lecturer / Assistant Professor	Yes, I manage multiple people	Full-time fixed term / contract	1-2 years	NULL	Mostly computational	31-4 hours	None of the above						3	5	3	Somewhat unimportant	Extremely important	Somewhat important	Extremely important	Somewhat successful	Somewhat unsuccesful	Somewhat successful	Somewhat unsuccesful	Somewhat successful	Neutral	Somewhat successful	Somewhat unsuccesful	6	4	2	5	5	4	5	6	5	3	4	5	3	5	21-3 years	2
391	I used to be part of the research community, but no longer am	For better compensation / salary;Bullying and harassment;Discrimination	5+ years ago	NULL	NULL	NULL	NULL	NULL	NULL	NULL	NULL	NULL	NULL									NULL	NULL	NULL	NULL	NULL	NULL	NULL	NULL	NULL	NULL	NULL	NULL															NULL
392	I am a student	NULL	NULL	Life Sciences;Physical Sciences	NULL	NULL	NULL	NULL	NULL	Doctoral degree (PhD/DPhil/MD)	NULL	31-4 hours	Had a conversation with you about your career aspirations;Discussed your performance;Connected you to others within or outside your field;Discussed alternative career options;Requested your feedback on their management of you	5	6	5	3	6	3	3	4	Extremely important	Extremely important	Extremely important	Extremely important	Somewhat unsuccesful	Somewhat successful	Extremely successful	Somewhat successful	Somewhat successful	Somewhat unsuccesful	Somewhat successful	Neutral	6	6	6	5	5	7	5	5	6	5	5	3	3	2	NULL	4
393	I am employed / contracted / freelance	NULL	NULL	Life Sciences;Physical Sciences	Academia / university	Postdoc / Research Associate	No	Full-time fixed term / contract	3-5 years	NULL	Mostly computational	41-5 hours	None of the above	2	7	1	1	7	1	1	1	Extremely important	Extremely important	Extremely important	Extremely important	Somewhat successful	Somewhat unsuccesful	Neutral	Somewhat unsuccesful	Somewhat successful	Somewhat unsuccesful	Neutral	Neutral	5	5	5	2	5	3	7	6	3	3	3	3	5	1	3-5 years	5
394	I am employed / contracted / freelance	NULL	NULL	Life Sciences	Academia / university	Group Leader	Yes, I manage multiple people	Full-time fixed term / contract	3-5 years	NULL	Mostly wet lab – based on experimental equipment and reagents	31-4 hours	Discussed your performance;Conducted a formal appraisal						3	1	1	Extremely important	Somewhat important	Extremely important	Somewhat important	Somewhat successful	Neutral	Somewhat successful	Somewhat successful	Extremely successful	Neutral	Somewhat unsuccesful	Somewhat unsuccesful	5	5	6	6	6	3	7	4	4	3	4	2	2	6	11-2 years	5
395	I am employed / contracted / freelance	NULL	NULL	Life Sciences	Government laboratory	Group Leader	Yes, I manage multiple people	Full-time permanent	NULL	NULL	Other - a mixture of above	41-5 hours	Offered you training to support your skill development;Connected you to others within or outside your field;Provided expert advice						4	3	1	Extremely important	Extremely important	Extremely important	Somewhat important	Somewhat successful	Extremely successful	Extremely successful	Extremely successful	Somewhat unsuccesful	Somewhat unsuccesful	Somewhat unsuccesful	Somewhat unsuccesful	3	5	6	4	5	5	6	7	3	2	2	3	3	2	11-2 years	6
396	I am employed / contracted / freelance	NULL	NULL	Life Sciences	Academia / university	Professor	Yes, I manage multiple people	Full-time permanent	NULL	NULL	Mostly human participants	71-8 hours	Provided career advice and guidance;Discussed your performance;Noted your achievements;Offered you training to support your skill development;Provided expert advice;Conducted a formal appraisal						4	4	3	Extremely important	Extremely important	Extremely important	Extremely important	Somewhat successful	Somewhat successful	Somewhat successful	Somewhat successful	Somewhat successful	Somewhat successful	Somewhat successful	Somewhat successful	2	5	5	4	4	3	4	7	4	5	5	6	5	7	11-2 years	6
397	I am employed / contracted / freelance	NULL	NULL	Life Sciences	Academia / university	Postdoc / Research Associate	Yes, I manage 1 person	Full-time permanent	NULL	NULL	Mostly computational	41-5 hours	Noted your achievements;Supported your wellbeing;Provided expert advice	5	7	7	1	7	2	1	1	Extremely important	Extremely important	Somewhat important	Extremely important	Somewhat successful	Somewhat successful	Somewhat successful	Neutral	Somewhat successful	Somewhat unsuccesful	Neutral	Somewhat unsuccesful	3	4	4	4	6	3	3	3	5	1	3	2	3	5	1-2 years	5
398	I am employed / contracted / freelance	NULL	NULL	Life Sciences	Academia / university	Research Support Staff	No	Full-time permanent	NULL	NULL	Other - a mixture of above	41-5 hours	Discussed your performance;Noted your achievements;Supported your wellbeing;Conducted a formal appraisal						3	6	5	Extremely important	Extremely important	Extremely important	Extremely important	Somewhat successful	Neutral	N/A	Somewhat unsuccesful	Somewhat successful	Somewhat successful	Somewhat successful	Somewhat successful	5	3	5	4	4	3	2	7	3	5	8	8	5	6	11-2 years	5
399	I used to be part of the research community, but no longer am	For career progression / development	5+ years ago	NULL	NULL	NULL	NULL	NULL	NULL	NULL	NULL	NULL	NULL									NULL	NULL	NULL	NULL	NULL	NULL	NULL	NULL	NULL	NULL	NULL	NULL															NULL
400	I am employed / contracted / freelance	NULL	NULL	Life Sciences	Academia / university	Postdoc / Research Associate	Yes, I manage multiple people	Full-time fixed term / contract	3-5 years	NULL	Mostly wet lab – based on experimental equipment and reagents	31-4 hours	Offered you training to support your skill development;Supported you with personal issues;Supported your wellbeing;Provided expert advice;Conducted a formal appraisal	7	7	7	1	5	6	6	6	Extremely important	Extremely important	Somewhat important	Extremely important	Somewhat successful	Somewhat successful	Somewhat successful	Somewhat successful	Somewhat successful	Somewhat successful	Somewhat successful	Extremely successful	7	7	6	7	2	1	7	7	1	5	6	1	1	6	6-1 years	6
401	I am employed / contracted / freelance	NULL	NULL	Physical Sciences	Academia / university	Senior Lecturer / Associate Professor	No	Full-time permanent	NULL	NULL	Mostly human participants	51-6 hours	Discussed your performance;Supported you with personal issues;Conducted a formal appraisal						1	1	4	Extremely important	Extremely important	Neutral	Somewhat important	Extemely unsuccesful	Extemely unsuccesful	Extemely unsuccesful	Extemely unsuccesful	Extemely unsuccesful	Extemely unsuccesful	Extemely unsuccesful	Extemely unsuccesful	2	4	4	3	3	4	4	4	7	3	1	7	7	1	11-2 years	2
402	I am employed / contracted / freelance	NULL	NULL	Life Sciences	Academia / university	Senior Lecturer / Associate Professor	Yes, I manage multiple people	Full-time permanent	NULL	NULL	Mostly human participants	51-6 hours	Had a conversation with you about your career aspirations;Discussed your performance;Conducted a formal appraisal						1	1	1	Somewhat important	Somewhat important	Extremely important	Somewhat important	Somewhat successful	Somewhat unsuccesful	Somewhat unsuccesful	Neutral	Somewhat unsuccesful	Somewhat unsuccesful	Extemely unsuccesful	Somewhat unsuccesful	1	1	1	2	7	7	7	2	7	1	2	7	7	3	11-2 years	1
403	I am employed / contracted / freelance	NULL	NULL	Life Sciences	Academia / university	Postdoc / Research Associate	Yes, I manage multiple people	Full-time fixed term / contract	1-2 years	NULL	Mostly computational	41-5 hours	None of the above	2	2	4	6	2	1	1	1	Extremely important	Neutral	Extremely important	Extremely important	Extemely unsuccesful	Extemely unsuccesful	Extemely unsuccesful	Extemely unsuccesful	Extemely unsuccesful	Extemely unsuccesful	Extemely unsuccesful	Extemely unsuccesful	1	2	3	8	7	7	7	2	6	1	2	5	5	1	6-1 years	1
404	I am employed / contracted / freelance	NULL	NULL	Life Sciences	Life sciences industry (pharmaceuticals, biotechnology, medical technology and consumer healthcare)	Research Assistant	No	Full-time fixed term / contract	1-2 years	NULL	Mostly wet lab – based on experimental equipment and reagents	61-7 hours	Provided an example of appropriate research standards	4	2	4	4	6	4	4	6	Extremely important	Extremely important	Extremely important	Extremely important	Somewhat successful	Somewhat successful	Neutral	Neutral	Somewhat successful	Somewhat successful	Neutral	Neutral	2	5	3	4	5	4	4	5	5	3	4	5	5	8	3-5 years	4
405	I am employed / contracted / freelance	NULL	NULL	Humanities / Social Sciences	Academia / university	Senior Lecturer / Associate Professor	No	Full-time permanent	NULL	NULL	Mostly primary sources / artefacts	41-5 hours	Had a conversation with you about your career aspirations;Provided career advice and guidance;Discussed your performance;Conducted a formal appraisal						3	6	2	Extremely important	Somewhat important	Somewhat important	Somewhat important	Extemely unsuccesful	Extemely unsuccesful	Extemely unsuccesful	Somewhat unsuccesful	Somewhat successful	Somewhat unsuccesful	Somewhat unsuccesful	Neutral	1	1	2	2	6	4	1	5	4	1	1	7	7	6	11-2 years	2
406	I am a student	NULL	NULL	Humanities / Social Sciences	NULL	NULL	NULL	NULL	NULL	Doctoral degree (PhD/DPhil/MD)	NULL	51-6 hours	Had a conversation with you about your career aspirations;Provided career advice and guidance;Provided an example of appropriate research standards;Provided expert advice	7	6	2	5	5	2	4	4	Somewhat important	Somewhat important	Extremely important	Extremely important	Somewhat successful	Somewhat successful	Somewhat successful	Somewhat successful	Somewhat successful	Somewhat unsuccesful	Extemely unsuccesful	Somewhat unsuccesful	2	6	2	5	7	4	5	5	6	1	2	4	3	5	NULL	3
407	I am employed / contracted / freelance	NULL	NULL	Life Sciences	Academia / university	Senior Lecturer / Associate Professor	Yes, I manage multiple people	Full-time permanent	NULL	NULL	Mostly wet lab – based on experimental equipment and reagents	61-7 hours	Noted your achievements;Offered you training to support your skill development;Provided expert advice;Conducted a formal appraisal;Requested your feedback on their management of you						1	1	1	Extremely important	Somewhat important	Extremely important	Extremely important	Somewhat successful	Somewhat successful	Somewhat successful	Neutral	Somewhat unsuccesful	Somewhat unsuccesful	Somewhat unsuccesful	Somewhat unsuccesful	7	6	3	4	1	7	6	4	7	6	6	7	7	7	11-2 years	6
408	I used to be part of the research community, but no longer am	It was impacting on my wellbeing and mental health;Bullying and harassment	3-5 years ago	Humanities / Social Sciences	NULL	NULL	NULL	NULL	NULL	NULL	NULL	NULL	NULL									Extremely important	Extremely important	Extremely important	Somewhat important	NULL	NULL	NULL	NULL	NULL	NULL	NULL	NULL	3	5	5	4	4	3	7	3	5	1	1	3	4	8	NULL	3
409	I am employed / contracted / freelance	NULL	NULL	Humanities / Social Sciences	Academia / university	Director	Yes, I manage multiple people	Full-time permanent	NULL	NULL	Mostly human participants	51-6 hours	Not applicable						3	1	1	Extremely important	Extremely important	Extremely important	Extremely important	Somewhat successful	Somewhat successful	Somewhat successful	Somewhat successful	Somewhat unsuccesful	Somewhat unsuccesful	Somewhat unsuccesful	Somewhat unsuccesful	3	5	5	5	5	3	6	7	4	4	5	4	5	2	11-2 years	3
410	I am employed / contracted / freelance	NULL	NULL	Humanities / Social Sciences	Academia / university	Research Support Staff	No	Full-time permanent	NULL	NULL	Mostly human participants	31-4 hours	Had a conversation with you about your career aspirations;Discussed your performance;Noted your achievements;Supported your wellbeing						3	1	2	Extremely important	Extremely important	Extremely important	Extremely important	Somewhat unsuccesful	Neutral	Somewhat successful	Somewhat successful	Somewhat successful	Somewhat successful	Somewhat successful	Somewhat successful	6	5	3	4	5	2	4	7	8	7	2	7	6	6	6-1 years	2
411	I am employed / contracted / freelance	NULL	NULL	Life Sciences	Academia / university	Professor	Yes, I manage multiple people	Full-time permanent	NULL	NULL	Mostly human participants	41-5 hours	Discussed your performance;Supported your wellbeing;Conducted a formal appraisal						3	2	2	Somewhat important	Extremely important	Extremely important	Extremely important	Somewhat successful	Somewhat successful	Somewhat successful	Somewhat successful	Somewhat unsuccesful	Somewhat successful	Somewhat successful	Somewhat unsuccesful	2	3	3	4	6	4	7	6	3	5	3	7	6	6	21-3 years	3
412	I am employed / contracted / freelance	NULL	NULL	Humanities / Social Sciences	Academia / university	Senior Lecturer / Associate Professor	No	Full-time permanent	NULL	NULL	Mostly human participants	71-8 hours	None of the above						1	1	1	Not important at all	Not important at all	Somewhat unimportant	Not important at all	Somewhat unsuccesful	Somewhat unsuccesful	Somewhat unsuccesful	Somewhat unsuccesful	Extemely unsuccesful	Extemely unsuccesful	Extemely unsuccesful	Extemely unsuccesful	1	2	2	2	7	7	5	3	7	1	1	7	7	1	11-2 years	5
413	I am looking for work / unemployed	NULL	NULL	Humanities / Social Sciences	NULL	NULL	NULL	NULL	NULL	NULL	NULL	NULL	NULL									Somewhat important	Somewhat important	Extremely important	Extremely important	NULL	NULL	NULL	NULL	NULL	NULL	NULL	NULL															6-1 years
414	I am employed / contracted / freelance	NULL	NULL	Life Sciences	Academia / university	Senior Lecturer / Associate Professor	Yes, I manage multiple people	Full-time permanent	NULL	NULL	Other - a mixture of above	51-6 hours	Not applicable						6	6	5	Extremely important	Extremely important	Somewhat important	Extremely important	Somewhat successful	Extremely successful	Somewhat successful	Somewhat successful	Somewhat successful	Extremely successful	Somewhat successful	Somewhat successful	3	6	6	4	6	4	5	7	1	7	7	6	1	3	11-2 years	6
415	I am employed / contracted / freelance	NULL	NULL	Life Sciences	Academia / university	Postdoc / Research Associate	No	Full-time fixed term / contract	3-5 years	NULL	Mostly computational	41-5 hours	Had a conversation with you about your career aspirations;Provided career advice and guidance;Connected you to others within or outside your field;Supported you with personal issues;Supported your wellbeing;Provided expert advice	6	6	2	3	5	4	3	3	Extremely important	Extremely important	Extremely important	Extremely important	Somewhat successful	Neutral	Somewhat successful	Somewhat successful	Somewhat successful	Somewhat successful	Somewhat unsuccesful	Somewhat successful	2	3	3	4	3	3	5	4	4	2	5	4	5	6	6-1 years	6
416	I am a student	NULL	NULL	Life Sciences	NULL	NULL	NULL	NULL	NULL	Doctoral degree (PhD/DPhil/MD)	NULL	61-7 hours	Discussed your performance;Noted your achievements;Offered you training to support your skill development;Supported your wellbeing;Provided expert advice;Conducted a formal appraisal	5	5	4	3	6	5	6	6	Extremely important	Extremely important	Extremely important	Somewhat important	Somewhat successful	Somewhat successful	Extremely successful	Neutral	Somewhat successful	Somewhat successful	Somewhat successful	Somewhat successful	4	6	6	3	3	4	3	6	4	4	6	2	2	6	NULL	6
417	I am employed / contracted / freelance	NULL	NULL	Life Sciences	Academia / university	Postdoc / Research Associate	Yes, I manage multiple people	Full-time fixed term / contract	1-2 years	NULL	Mostly computational	41-5 hours	Had a conversation with you about your career aspirations;Provided career advice and guidance;Discussed your performance;Noted your achievements;Offered you training to support your skill development;Supported your wellbeing;Provided expert advice;Conducted a formal appraisal;Discussed alternative career options	6	7	6	1	7	4	5	6	Extremely important	Extremely important	Extremely important	Extremely important	Extremely successful	Somewhat successful	Extremely successful	Neutral	I don't know	Somewhat successful	I don't know	Neutral	4	7	6	4	2	1	1	6	4	5	6	4	2	4	11-2 years	4
418	I am a student	NULL	NULL	Life Sciences	NULL	NULL	NULL	NULL	NULL	Doctoral degree (PhD/DPhil/MD)	NULL	41-5 hours	Had a conversation with you about your career aspirations;Provided career advice and guidance;Discussed your performance;Noted your achievements;Connected you to others within or outside your field;Supported you with personal issues;Supported your wellbeing	5	6	6	1	7	4	3	4	Somewhat important	Extremely important	Extremely important	Extremely important	Neutral	Somewhat successful	Somewhat successful	Neutral	Neutral	Neutral	Neutral	Neutral	4	5	3	5	4	4	6	4	5	2	4	4	4	3	NULL	6
419	I am employed / contracted / freelance	NULL	NULL	Life Sciences	Academia / university	Training Fellow	Other - supervise students	Full-time fixed term / contract	3-5 years	NULL	Mostly wet lab – based on experimental equipment and reagents	51-6 hours	Had a conversation with you about your career aspirations;Discussed your performance;Offered you training to support your skill development;Provided expert advice;Discussed alternative career options	2	4	2	1	2	4	4	3	Extremely important	Extremely important	Extremely important	Extremely important	Extremely successful	Neutral	Extremely successful	Neutral	Extremely successful	Somewhat unsuccesful	Extremely successful	Somewhat unsuccesful	4	6	6	4	4	4	4	6	4	3	6	4	4	6	6-1 years	3
420	I used to be part of the research community, but no longer am	I wanted to apply my skills elsewhere	3-5 years ago	Life Sciences	NULL	NULL	NULL	NULL	NULL	NULL	NULL	NULL	NULL									Extremely important	Extremely important	Extremely important	Extremely important	NULL	NULL	NULL	NULL	NULL	NULL	NULL	NULL	6	5	5	5	7	7	7	6	6	7	5	5	5	6	NULL	6
421	I am employed / contracted / freelance	NULL	NULL	Life Sciences	Academia / university	Head of Department	Yes, I manage multiple people	Full-time permanent	NULL	NULL	Mostly wet lab – based on experimental equipment and reagents	41-5 hours	Discussed your performance;Provided an example of appropriate ethical codes;Noted your achievements;Offered you training to support your skill development;Supported your wellbeing;Conducted a formal appraisal						6	6	7	Extremely important	Somewhat important	Extremely important	Somewhat important	Somewhat successful	Somewhat successful	Extremely successful	Extremely successful	Somewhat successful	Extremely successful	Extremely successful	Extremely successful	5	6	7	7	4	2	2	7	3	7	7	2	3	5	3+ years	6
422	I am employed / contracted / freelance	NULL	NULL	Humanities / Social Sciences	Academia / university	Senior Lecturer / Associate Professor	No	Full-time permanent	NULL	NULL	Mostly human participants	51-6 hours	Noted your achievements;Conducted a formal appraisal						2	4	4	Extremely important	Extremely important	Extremely important	Somewhat important	Extemely unsuccesful	Extemely unsuccesful	Neutral	Somewhat unsuccesful	Neutral	Somewhat unsuccesful	Somewhat unsuccesful	Somewhat unsuccesful	2	1	3	3	7	4	3	6	3	3	1	7	6	6	11-2 years	3
423	I am employed / contracted / freelance	NULL	NULL	Life Sciences;Humanities / Social Sciences	Academia / university	Postdoc / Research Associate	Yes, I manage multiple people	Full-time fixed term / contract	3-5 years	NULL	Mostly human participants	31-4 hours	Provided career advice and guidance;Discussed your performance;Noted your achievements;Supported you with personal issues;Provided expert advice;Conducted a formal appraisal	5	5	1	1	6	5	6	4	Somewhat important	Extremely important	Extremely important	Somewhat important	Extremely successful	Extremely successful	Somewhat successful	Neutral	Extremely successful	Somewhat successful	Extremely successful	Somewhat successful	4	3	5	5	4	2	2	6	2	5	5	4	4	6	3-5 years	5
424	I am employed / contracted / freelance	NULL	NULL	Life Sciences	Academia / university	Research Technician / Officer	Yes, I manage multiple people	Full-time permanent	NULL	NULL	Mostly wet lab – based on experimental equipment and reagents	31-4 hours	Had a conversation with you about your career aspirations;Discussed your performance;Offered you training to support your skill development;Provided expert advice;Conducted a formal appraisal						2	6	4	Extremely important	Extremely important	Extremely important	Somewhat important	Somewhat unsuccesful	Somewhat successful	Somewhat unsuccesful	Somewhat successful	Somewhat successful	Somewhat successful	Somewhat successful	Neutral	6	4	4	4	4	5	5	5	4	3	3	3	4	8	11-2 years	3
425	I am employed / contracted / freelance	NULL	NULL	Life Sciences;Physical Sciences	Academia / university	Postdoc / Research Associate	Yes, I manage multiple people	Full-time fixed term / contract	1-2 years	NULL	Mostly wet lab – based on experimental equipment and reagents	41-5 hours	Discussed your performance;Connected you to others within or outside your field;Provided expert advice;Requested your feedback on their management of you	7	7	5	5	6	4	8	4	Extremely important	Extremely important	Extremely important	Extremely important	Somewhat successful	Somewhat successful	Somewhat unsuccesful	Neutral	Somewhat successful	Somewhat successful	Neutral	N/A	6	6	6	5	5	4	5	7	3	5	5	4	4	4	1-2 years	3
426	I am employed / contracted / freelance	NULL	NULL	Life Sciences	Academia / university	Postdoc / Research Associate	Yes, I manage 1 person	Full-time fixed term / contract	3-5 years	NULL	Mostly wet lab – based on experimental equipment and reagents	41-5 hours	Offered you training to support your skill development;Connected you to others within or outside your field;Provided expert advice	6	5	5	2	5	5	5	5	Somewhat important	Somewhat important	Somewhat important	Extremely important	Somewhat unsuccesful	Somewhat unsuccesful	Somewhat unsuccesful	Neutral	Neutral	Neutral	Neutral	Neutral	5	6	6	5	2	2	4	4	4	4	4	4	4	4	6-1 years	6
427	I am employed / contracted / freelance	NULL	NULL	Life Sciences	Academia / university	Postdoc / Research Associate	No	Full-time fixed term / contract	3-5 years	NULL	Mostly computational	41-5 hours	Noted your achievements	1	7	6	1	5	6	1	4	Somewhat important	Somewhat important	Extremely important	Extremely important	Extremely successful	Somewhat successful	Somewhat successful	Somewhat unsuccesful	Extremely successful	Extremely successful	Extremely successful	Somewhat successful	7	6	6	6	4	2	3	7	3	5	6	5	4	5	11-2 years	5
428	I am a student	NULL	NULL	Life Sciences	NULL	NULL	NULL	NULL	NULL	Doctoral degree (PhD/DPhil/MD)	NULL	41-5 hours	Had a conversation with you about your career aspirations;Provided career advice and guidance;Noted your achievements;Offered you training to support your skill development;Connected you to others within or outside your field;Supported you with personal issues;Supported your wellbeing;Provided expert advice	7	7	6	3	6	6	6	6	Extremely important	Extremely important	Extremely important	Extremely important	Somewhat successful	Somewhat successful	Somewhat successful	Somewhat successful	Somewhat successful	Somewhat successful	Somewhat successful	Somewhat successful	6	6	6	5	2	3	5	5	4	6	6	2	2	6	NULL	6
429	I am a student	NULL	NULL	Life Sciences	NULL	NULL	NULL	NULL	NULL	Doctoral degree (PhD/DPhil/MD)	NULL	71-8 hours	Had a conversation with you about your career aspirations;Provided career advice and guidance;Discussed your performance;Noted your achievements;Offered you training to support your skill development;Provided an example of appropriate research standards;Supported you with personal issues;Provided expert advice	7	7	7	2	7	4	3	4	Extremely important	Extremely important	Extremely important	Extremely important	Somewhat successful	Somewhat successful	Somewhat successful	Somewhat successful	Somewhat successful	Somewhat successful	Somewhat successful	Somewhat successful	2	6	6	4	1	1	8	7	3	7	7	5	2	7	NULL	4
430	I am employed / contracted / freelance	NULL	NULL	Life Sciences	Academia / university	Professor	Yes, I manage multiple people	Full-time permanent	NULL	NULL	Mostly wet lab – based on experimental equipment and reagents	71-8 hours	Had a conversation with you about your career aspirations;Provided career advice and guidance;Discussed your performance;Provided an example of appropriate ethical codes;Noted your achievements;Connected you to others within or outside your field;Conducted a formal appraisal;Requested your feedback on their management of you						6	4	6	Extremely important	Extremely important	Extremely important	Extremely important	Somewhat successful	Somewhat successful	Extremely successful	Extremely successful	Somewhat successful	Extremely successful	Extremely successful	Somewhat successful	6	7	7	7	1	1	4	7	3	7	6	2	3	7	21-3 years	7
431	I am a student	NULL	NULL	Life Sciences	NULL	NULL	NULL	NULL	NULL	Doctoral degree (PhD/DPhil/MD)	NULL	41-5 hours	Discussed your performance;Provided an example of appropriate research standards;Provided expert advice	7	5	6	4	6	4	4	4	Somewhat important	Extremely important	Extremely important	Somewhat important	Neutral	Neutral	Neutral	Extemely unsuccesful	Somewhat successful	Somewhat successful	Somewhat successful	Extremely successful	4	4	5	1	1	3	4	7	4	5	4	6	5	5	NULL	4
432	I am employed / contracted / freelance	NULL	NULL	Life Sciences	Academia / university	Professor	Yes, I manage 1 person	Full-time permanent	NULL	NULL	Mostly wet lab – based on experimental equipment and reagents	51-6 hours	Conducted a formal appraisal						1	1	2	Extremely important	Extremely important	Extremely important	Extremely important	Somewhat successful	Somewhat successful	Extremely successful	Extremely successful	Somewhat unsuccesful	Somewhat unsuccesful	Neutral	Neutral	1	5	4	4	5	4	6	4	6	2	2	6	6	5	3+ years	2
433	I am employed / contracted / freelance	NULL	NULL	Life Sciences	Not-for-profit research institute (including charity funded, research council funded etc)	Postdoc / Research Associate	No	Full-time permanent	NULL	NULL	Other - a mixture of above	41-5 hours	Had a conversation with you about your career aspirations;Provided career advice and guidance;Discussed your performance;Connected you to others within or outside your field;Provided expert advice;Conducted a formal appraisal	5	4	6	2	6	3	2	3	Extremely important	Extremely important	Extremely important	Extremely important	Extemely unsuccesful	Neutral	Somewhat unsuccesful	Somewhat unsuccesful	Somewhat unsuccesful	Somewhat unsuccesful	Somewhat unsuccesful	Neutral	5	5	5	5	6	4	7	5	4	2	3	3	4	2	6-1 years	1
434	I am employed / contracted / freelance	NULL	NULL	Life Sciences	Academia / university	Independent Fellow	No	Full-time fixed term / contract	3-5 years	NULL	Mostly wet lab – based on experimental equipment and reagents	41-5 hours	Had a conversation with you about your career aspirations;Provided career advice and guidance;Discussed your performance;Noted your achievements;Connected you to others within or outside your field;Supported you with personal issues;Supported your wellbeing;Provided expert advice;Conducted a formal appraisal						5	6	6	Extremely important	Extremely important	Extremely important	Extremely important	Somewhat successful	Somewhat successful	Somewhat successful	Somewhat successful	Somewhat successful	Somewhat successful	Extremely successful	Somewhat successful	5	6	5	5	2	2	3	5	7	6	6	5	4	5	6-1 years	5
435	I am employed / contracted / freelance	NULL	NULL	Life Sciences	Government laboratory	Research Technician / Officer	Yes, I manage multiple people	Full-time fixed term / contract	1-2 years	NULL	Mostly wet lab – based on experimental equipment and reagents	31-4 hours	Provided career advice and guidance;Discussed your performance;Noted your achievements;Connected you to others within or outside your field;Provided expert advice;Conducted a formal appraisal						2	2	5	Extremely important	Extremely important	Extremely important	Extremely important	Somewhat successful	Somewhat successful	Somewhat successful	Somewhat unsuccesful	Somewhat successful	Neutral	Neutral	Neutral	4	4	4	4	3	1	8	7	4	1	6	7	7	1	11-2 years	4
436	I am employed / contracted / freelance	NULL	NULL	Life Sciences;Physical Sciences	Academia / university	Lecturer / Assistant Professor	Yes, I manage 1 person	Full-time permanent	NULL	NULL	Mostly wet lab – based on experimental equipment and reagents	51-6 hours	Discussed your performance;Conducted a formal appraisal						1	2	5	Extremely important	Extremely important	Extremely important	Extremely important	Somewhat unsuccesful	Somewhat successful	Somewhat successful	Somewhat unsuccesful	Somewhat unsuccesful	Somewhat successful	Somewhat successful	Somewhat successful	1	2	4	4	4	6	3	6	6	6	3	7	7	4	21-3 years	3
437	I am employed / contracted / freelance	NULL	NULL	Life Sciences	Academia / university	Postdoc / Research Associate	Yes, I manage 1 person	Full-time permanent	NULL	NULL	In the field	51-6 hours	Had a conversation with you about your career aspirations;Provided career advice and guidance;Discussed your performance;Provided an example of appropriate ethical codes;Noted your achievements;Provided an example of appropriate research standards;Connected you to others within or outside your field;Supported your wellbeing;Provided expert advice;Conducted a formal appraisal	3	7	7	1	7	7	4	6	Somewhat unimportant	Extremely important	Extremely important	Extremely important	Somewhat unsuccesful	Somewhat successful	Extremely successful	Neutral	Neutral	Somewhat successful	Extremely successful	Somewhat unsuccesful	5	7	6	3	3	2	2	7	1	6	7	3	2	4	6-1 years	4
438	I am employed / contracted / freelance	NULL	NULL	Life Sciences	Academia / university	Director	Yes, I manage multiple people	Full-time permanent	NULL	NULL	Mostly wet lab – based on experimental equipment and reagents	61-7 hours	Had a conversation with you about your career aspirations;Discussed your performance;Noted your achievements;Supported your wellbeing;Provided expert advice;Conducted a formal appraisal;Requested your feedback on their management of you						5	5	7	Extremely important	Extremely important	Extremely important	Somewhat important	Somewhat successful	Extremely successful	Extremely successful	Extremely successful	Somewhat successful	Somewhat successful	Somewhat successful	Extremely successful	5	6	5	5	6	1	7	6	5	7	7	6	2	6	21-3 years	6
440	I am a student;I am employed / contracted / freelance	NULL	NULL	Life Sciences	Academia / university	Research Technician / Officer	No	Part-time fixed term / contract	1-2 years	Doctoral degree (PhD/DPhil/MD)	Mostly wet lab – based on experimental equipment and reagents	61-7 hours	Had a conversation with you about your career aspirations;Provided career advice and guidance;Provided expert advice	2	4	7	1	6	8	8	8	Extremely important	Extremely important	Extremely important	Somewhat important	Neutral	Somewhat successful	Neutral	I don't know	Somewhat successful	Somewhat successful	I don't know	Somewhat successful	3	7	8	8	8	2	8	7	2	5	6	8	1	8	3-5 years	7
441	I am a student	NULL	NULL	Life Sciences	NULL	NULL	NULL	NULL	NULL	Doctoral degree (PhD/DPhil/MD)	NULL	41-5 hours	Had a conversation with you about your career aspirations;Provided career advice and guidance;Discussed your performance;Noted your achievements;Offered you training to support your skill development;Connected you to others within or outside your field;Supported your wellbeing;Provided expert advice	6	5	2	4	7	5	4	5	Extremely important	Extremely important	Extremely important	Extremely important	Extremely successful	Neutral	Somewhat successful	Neutral	Extremely successful	Extremely successful	Somewhat successful	Neutral	4	5	6	3	6	5	6	7	2	5	7	2	1	3	NULL	7
442	I am a student	NULL	NULL	Life Sciences	NULL	NULL	NULL	NULL	NULL	Doctoral degree (PhD/DPhil/MD)	NULL	51-6 hours	Provided career advice and guidance;Discussed your performance;Provided an example of appropriate ethical codes;Noted your achievements;Provided an example of appropriate research standards;Connected you to others within or outside your field;Supported you with personal issues;Supported your wellbeing;Provided expert advice;Requested your feedback on their management of you	6	6	5	5	6	6	5	5	Extremely important	Extremely important	Extremely important	Somewhat important	Somewhat successful	Extremely successful	Somewhat successful	Neutral	Somewhat successful	Somewhat successful	Somewhat successful	Somewhat successful	6	6	7	6	2	5	5	5	5	7	6	5	4	5	NULL	6
443	I am employed / contracted / freelance	NULL	NULL	Humanities / Social Sciences	Academia / university	Lecturer / Assistant Professor	Yes, I manage 1 person	Full-time permanent	NULL	NULL	Mostly human participants	31-4 hours	Conducted a formal appraisal						2	2	2	Somewhat important	Extremely important	Somewhat important	Extremely important	Somewhat unsuccesful	Somewhat unsuccesful	Somewhat unsuccesful	Somewhat unsuccesful	Neutral	Somewhat unsuccesful	Somewhat successful	Somewhat successful	5	2	2	2	6	5	6	5	5	4	4	5	5	6	11-2 years	2
444	I am employed / contracted / freelance	NULL	NULL	Life Sciences	Academia / university	Professor	Yes, I manage multiple people	Full-time permanent	NULL	NULL	Other - a mixture of above	41-5 hours	Noted your achievements;Provided expert advice						3	1	3	Extremely important	Extremely important	Extremely important	Extremely important	Neutral	Neutral	Neutral	Somewhat successful	Somewhat unsuccesful	Somewhat unsuccesful	Somewhat successful	Neutral	1	2	2	4	6	6	4	5	7	5	3	7	5	5	21-3 years	2
445	I am employed / contracted / freelance	NULL	NULL	Life Sciences;Humanities / Social Sciences	Other	Research Technician / Officer	Yes, I manage 1 person	Full-time permanent	NULL	NULL	Not applicable	31-4 hours	Discussed your performance;Noted your achievements;Offered you training to support your skill development;Provided an example of appropriate research standards;Provided expert advice						5	3	6	Extremely important	Extremely important	Extremely important	Somewhat important	Somewhat successful	Extremely successful	Somewhat successful	Somewhat successful	Somewhat successful	Neutral	Somewhat unsuccesful	Somewhat successful	5	6	5	8	8	5	6	6	6	5	5	4	3	6	3-5 years	6
446	I am a student	NULL	NULL	Life Sciences	NULL	NULL	NULL	NULL	NULL	Doctoral degree (PhD/DPhil/MD)	NULL	51-6 hours	None of the above	6	3	3	6	3	5	5	2	Extremely important	Extremely important	Extremely important	Extremely important	Somewhat successful	Somewhat unsuccesful	Somewhat successful	Somewhat unsuccesful	Somewhat successful	Extremely successful	Extremely successful	Extremely successful	1	2	5	4	5	4	3	6	4	3	2	4	4	3	NULL	2
447	I am employed / contracted / freelance	NULL	NULL	Life Sciences	Academia / university	Professor	Yes, I manage multiple people	Full-time permanent	NULL	NULL	Mostly wet lab – based on experimental equipment and reagents	51-6 hours	Discussed your performance;Noted your achievements;Provided expert advice;Conducted a formal appraisal						4	6	6	Somewhat unimportant	Extremely important	Somewhat important	Somewhat important	Somewhat successful	Somewhat successful	Somewhat successful	Somewhat successful	Somewhat successful	Somewhat successful	Somewhat successful	Somewhat successful	3	6	6	4	2	2	4	4	6	4	4	6	6	6	3+ years	6
448	I am employed / contracted / freelance	NULL	NULL	Life Sciences	Academia / university	Postdoc / Research Associate	No	Full-time fixed term / contract	3-5 years	NULL	Mostly human participants	51-6 hours	Had a conversation with you about your career aspirations;Discussed your performance;Connected you to others within or outside your field;Conducted a formal appraisal	3	5	4	3	6	3	5	1	Extremely important	Extremely important	Extremely important	Extremely important	Somewhat successful	Somewhat unsuccesful	Neutral	Somewhat successful	Somewhat unsuccesful	Neutral	Somewhat unsuccesful	Somewhat successful	2	5	3	5	5	5	5	4	7	2	4	6	6	6	6-1 years	4
449	I am employed / contracted / freelance	NULL	NULL	Life Sciences;Physical Sciences	Academia / university	Research Support Staff	No	Full-time permanent	NULL	NULL	Mostly computational	31-4 hours	Had a conversation with you about your career aspirations;Provided career advice and guidance;Discussed your performance;Noted your achievements;Offered you training to support your skill development;Provided expert advice;Conducted a formal appraisal						3	2	2	Somewhat important	Extremely important	Extremely important	Extremely important	Somewhat successful	N/A	Extremely successful	Neutral	Somewhat unsuccesful	Somewhat unsuccesful	Neutral	Neutral	4	4	5	4	6	4	5	4	5	1	3	3	2	8	6-1 years	5
450	I am a student	NULL	NULL	Life Sciences	NULL	NULL	NULL	NULL	NULL	Doctoral degree (PhD/DPhil/MD)	NULL	31-4 hours	Had a conversation with you about your career aspirations;Provided career advice and guidance;Discussed your performance;Provided an example of appropriate ethical codes;Noted your achievements;Offered you training to support your skill development;Provided an example of appropriate research standards;Connected you to others within or outside your field;Supported you with personal issues;Supporte…	5	7	7	1	7	5	8	6	Extremely important	Neutral	Extremely important	Somewhat important	Somewhat successful	Somewhat successful	Somewhat successful	Somewhat successful	Neutral	Somewhat successful	Neutral	Somewhat successful	7	7	6	3	3	2	5	7	3	6	6	8	3	8	NULL	6
451	I am employed / contracted / freelance	NULL	NULL	Life Sciences	Healthcare setting (hospital, community-based etc)	Head of Department	Yes, I manage multiple people	Full-time permanent	NULL	NULL	Mostly human participants	51-6 hours	Discussed your performance;Noted your achievements;Conducted a formal appraisal						4	4	5	Extremely important	Extremely important	Extremely important	Extremely important	Somewhat successful	Somewhat successful	Extremely successful	Extremely successful	Somewhat successful	Neutral	Neutral	Neutral	5	7	7	6	3	1	4	6	2	6	6	5	5	6	3+ years	7
452	I am a student	NULL	NULL	Life Sciences	NULL	NULL	NULL	NULL	NULL	Doctoral degree (PhD/DPhil/MD)	NULL	41-5 hours	Noted your achievements;Provided an example of appropriate research standards;Supported you with personal issues;Provided expert advice	3	5	3	6	4	2	8	2	Somewhat important	Extremely important	Extremely important	Extremely important	Neutral	Extremely successful	Somewhat successful	Neutral	Extemely unsuccesful	Somewhat unsuccesful	Extemely unsuccesful	Neutral	1	6	5	4	2	5	6	5	5	4	3	3	2	4	NULL	5
453	I used to be part of the research community, but no longer am	I wanted to apply my skills elsewhere;The career was too demanding;For career progression / development;For better compensation / salary;For a better work-life balance;It was impacting on my wellbeing and mental health	Less than 1 year ago	Humanities / Social Sciences	NULL	NULL	NULL	NULL	NULL	NULL	NULL	NULL	NULL									Extremely important	Neutral	Extremely important	Somewhat important	NULL	NULL	NULL	NULL	NULL	NULL	NULL	NULL	7	7	7	7	4	5	5	8	8	5	8	8	8	8	NULL	7
454	I am employed / contracted / freelance	NULL	NULL	Life Sciences	Academia / university	Professor	Yes, I manage multiple people	Part-time permanent	NULL	NULL	Mostly wet lab – based on experimental equipment and reagents	51-6 hours	Conducted a formal appraisal						1	1	1	Extremely important	Somewhat important	Somewhat important	Extremely important	Extemely unsuccesful	Extemely unsuccesful	Somewhat unsuccesful	Extemely unsuccesful	Extemely unsuccesful	Extemely unsuccesful	Extemely unsuccesful	Extemely unsuccesful	2	3	1	4	6	7	7	2	6	1	2	7	7	3	3+ years	1
455	I am employed / contracted / freelance	NULL	NULL	Life Sciences	Academia / university	Professor	Yes, I manage multiple people	Part-time permanent	NULL	NULL	Mostly computational	31-4 hours	Discussed your performance;Noted your achievements;Supported your wellbeing;Conducted a formal appraisal						3	3	5	Extremely important	Extremely important	Somewhat important	Somewhat important	Somewhat successful	Somewhat successful	Somewhat successful	Somewhat successful	Somewhat unsuccesful	Somewhat unsuccesful	Somewhat unsuccesful	Somewhat unsuccesful	2	5	4	4	5	5	5	5	7	3	5	6	6	7	3+ years	3
456	I am employed / contracted / freelance	NULL	NULL	Life Sciences	Healthcare setting (hospital, community-based etc)	Lecturer / Assistant Professor	No	Part-time fixed term / contract	3-5 years	NULL	Mostly human participants	11-2 hours	Had a conversation with you about your career aspirations;Provided career advice and guidance;Discussed your performance;Provided expert advice						6	8	3	Extremely important	Somewhat important	Extremely important	Somewhat important	Extremely successful	Somewhat successful	Somewhat successful	Somewhat successful	Somewhat successful	Neutral	I don't know	I don't know	3	3	4	5	6	3	3	5	3	5	5	6	3	4	3-5 years	2
457	I am employed / contracted / freelance	NULL	NULL	Life Sciences	Not-for-profit research institute (including charity funded, research council funded etc)	Group Leader	Yes, I manage multiple people	Full-time permanent	NULL	NULL	Mostly wet lab – based on experimental equipment and reagents	41-5 hours	Noted your achievements;Provided an example of appropriate research standards;Connected you to others within or outside your field						2	1	6	Extremely important	Extremely important	Extremely important	Extremely important	Extremely successful	Somewhat successful	Extremely successful	Somewhat successful	Somewhat successful	Somewhat successful	Somewhat successful	Somewhat unsuccesful	2	2	7	5	6	3	7	7	2	5	7	2	2	7	3+ years	7
458	I am retired	NULL	NULL	Life Sciences	NULL	NULL	NULL	NULL	NULL	NULL	NULL	NULL	NULL									Extremely important	Extremely important	Extremely important	Extremely important	NULL	NULL	NULL	NULL	NULL	NULL	NULL	NULL															NULL
459	I am employed / contracted / freelance	NULL	NULL	Life Sciences	Academia / university	Postdoc / Research Associate	No	Full-time fixed term / contract	1-2 years	NULL	Mostly wet lab – based on experimental equipment and reagents	61-7 hours	Had a conversation with you about your career aspirations;Provided career advice and guidance;Discussed your performance;Connected you to others within or outside your field;Supported your wellbeing;Provided expert advice	4	7	4	4	7	1	4	2	Not important at all	Extremely important	Extremely important	Extremely important	I don't know	Extremely successful	I don't know	I don't know	I don't know	I don't know	I don't know	Somewhat successful	4	4	5	4	4	6	5	5	6	4	2	6	7	4	11-2 years	1
460	I am a student	NULL	NULL	Life Sciences	NULL	NULL	NULL	NULL	NULL	Doctoral degree (PhD/DPhil/MD)	NULL	41-5 hours	Had a conversation with you about your career aspirations;Noted your achievements;Offered you training to support your skill development;Supported your wellbeing;Discussed alternative career options	7	7	7	2	7	8	8	6	Extremely important	Extremely important	Extremely important	Extremely important	Extremely successful	Extremely successful	Extremely successful	Neutral	Somewhat successful	Neutral	Somewhat successful	Extremely successful	6	7	7	6	4	5	6	6	7	4	6	6	3	5	NULL	4
461	I am employed / contracted / freelance	NULL	NULL	Life Sciences	Academia / university	Postdoc / Research Associate	Yes, I manage multiple people	Full-time fixed term / contract	1-2 years	NULL	Mostly wet lab – based on experimental equipment and reagents	31-4 hours	Had a conversation with you about your career aspirations;Provided career advice and guidance;Noted your achievements;Connected you to others within or outside your field;Supported you with personal issues;Supported your wellbeing;Discussed alternative career options	5	7	6	1	7	1	1	4	Somewhat important	Extremely important	Extremely important	Extremely important	Extremely successful	Somewhat unsuccesful	Somewhat unsuccesful	Extremely successful	Extemely unsuccesful	Extemely unsuccesful	Extemely unsuccesful	Extemely unsuccesful	7	7	5	6	2	2	6	3	5	1	5	3	1	7	6-1 years	5
462	I am a student	NULL	NULL	Life Sciences	NULL	NULL	NULL	NULL	NULL	Doctoral degree (PhD/DPhil/MD)	NULL	31-4 hours	Discussed your performance;Noted your achievements;Connected you to others within or outside your field	6	2	3	4	6	2	2	1	Somewhat important	Extremely important	Extremely important	Extremely important	Somewhat successful	Somewhat successful	Extemely unsuccesful	Extemely unsuccesful	Extemely unsuccesful	Somewhat unsuccesful	Neutral	Somewhat unsuccesful	2	7	3	1	1	4	6	2	4	1	3	1	5	8	NULL	4
463	I am employed / contracted / freelance	NULL	NULL	Life Sciences	Not-for-profit research institute (including charity funded, research council funded etc)	Laboratory / Facility Manager	No	Full-time permanent	NULL	NULL	Mostly wet lab – based on experimental equipment and reagents	31-4 hours	Noted your achievements;Supported you with personal issues;Supported your wellbeing;Conducted a formal appraisal						4	4	3	Extremely important	Extremely important	Extremely important	Extremely important	Somewhat unsuccesful	Neutral	Somewhat successful	Somewhat unsuccesful	Extemely unsuccesful	Neutral	Somewhat unsuccesful	Extemely unsuccesful	5	5	5	4	3	3	5	5	3	3	2	8	3	8	6-1 years	5
464	I am employed / contracted / freelance	NULL	NULL	Life Sciences;Humanities / Social Sciences	Academia / university	Postdoc / Research Associate	Yes, I manage multiple people	Full-time permanent	NULL	NULL	Mostly human participants	41-5 hours	Had a conversation with you about your career aspirations;Discussed your performance;Noted your achievements	2	7	7	1	7	7	7	7	Extremely important	Extremely important	Extremely important	Extremely important	Neutral	Neutral	Neutral	Neutral	Neutral	Neutral	Neutral	Neutral	7	7	7	7	2	1	7	7	1	7	7	1	1	4	11-2 years	7
465	I am employed / contracted / freelance	NULL	NULL	Life Sciences;Physical Sciences	Life sciences industry (pharmaceuticals, biotechnology, medical technology and consumer healthcare)	Research / Technical Specialist	Yes, I manage 1 person	Full-time permanent	NULL	NULL	Mostly computational	31-4 hours	Had a conversation with you about your career aspirations;Discussed your performance;Provided an example of appropriate ethical codes;Noted your achievements;Offered you training to support your skill development;Connected you to others within or outside your field;Supported your wellbeing;Provided expert advice;Conducted a formal appraisal;Requested your feedback on their management of you						6	7	6	Somewhat important	Extremely important	Somewhat important	Somewhat important	Somewhat successful	Somewhat successful	Somewhat successful	Somewhat successful	Somewhat successful	Somewhat successful	Somewhat successful	Somewhat successful	7	7	5	4	5	4	5	6	3	6	6	6	3	8	3-5 years	6
466	I am retired	NULL	NULL	Humanities / Social Sciences	NULL	NULL	NULL	NULL	NULL	NULL	NULL	NULL	NULL									Extremely important	Extremely important	Extremely important	Somewhat important	NULL	NULL	NULL	NULL	NULL	NULL	NULL	NULL															NULL
467	I am employed / contracted / freelance	NULL	NULL	Life Sciences	Academia / university	Independent Fellow	Yes, I manage multiple people	Full-time fixed term / contract	3-5 years	NULL	Mostly wet lab – based on experimental equipment and reagents	41-5 hours	Had a conversation with you about your career aspirations;Discussed your performance;Conducted a formal appraisal						2	2	1	Extremely important	Extremely important	Extremely important	Extremely important	Somewhat successful	Neutral	Neutral	Somewhat unsuccesful	Neutral	Somewhat successful	Neutral	Somewhat unsuccesful	3	3	4	3	7	6	6	3	6	3	3	5	6	3	11-2 years	3
468	I am employed / contracted / freelance	NULL	NULL	Life Sciences	Not-for-profit research institute (including charity funded, research council funded etc)	Director	Yes, I manage multiple people	Full-time permanent	NULL	NULL	Mostly human participants	61-7 hours	Not applicable						6	6	5	Extremely important	Extremely important	Extremely important	Extremely important	Extremely successful	Somewhat successful	Extremely successful	Somewhat successful	Somewhat successful	Somewhat successful	Extremely successful	Somewhat successful	4	6	5	5	3	1	4	7	3	6	7	4	3	5	21-3 years	6
469	I am employed / contracted / freelance	NULL	NULL	Life Sciences	Academia / university	Head of Department	Yes, I manage multiple people	Full-time permanent	NULL	NULL	Mostly wet lab – based on experimental equipment and reagents	51-6 hours	Had a conversation with you about your career aspirations;Provided career advice and guidance;Discussed your performance;Noted your achievements;Supported your wellbeing;Conducted a formal appraisal						3	3	5	Extremely important	Extremely important	Extremely important	Extremely important	Somewhat successful	Extremely successful	Extremely successful	Somewhat successful	Somewhat successful	Neutral	Somewhat successful	Neutral	4	7	6	5	4	3	4	2	5	6	6	7	5	7	11-2 years	6
470	I am employed / contracted / freelance	NULL	NULL	Life Sciences;Humanities / Social Sciences	Academia / university	Lecturer / Assistant Professor	Yes, I manage 1 person	Part-time fixed term / contract	3-5 years	NULL	Mostly human participants	31-4 hours	Discussed your performance;Offered you training to support your skill development;Conducted a formal appraisal						1	1	6	Extremely important	Extremely important	Extremely important	Extremely important	Extemely unsuccesful	Extemely unsuccesful	Extemely unsuccesful	Extemely unsuccesful	Somewhat successful	Extemely unsuccesful	Somewhat successful	Extemely unsuccesful	1	1	1	1	7	4	5	7	7	1	4	4	7	7	11-2 years	1
471	I am a student	NULL	NULL	Life Sciences	NULL	NULL	NULL	NULL	NULL	Doctoral degree (PhD/DPhil/MD)	NULL	31-4 hours	Had a conversation with you about your career aspirations;Provided career advice and guidance;Discussed your performance;Noted your achievements;Offered you training to support your skill development;Provided an example of appropriate research standards;Provided expert advice	3	7	7	1	7	5	2	3	Extremely important	Extremely important	Extremely important	Somewhat important	Neutral	Somewhat unsuccesful	Somewhat successful	Somewhat unsuccesful	Neutral	Neutral	Somewhat successful	Somewhat successful	6	2	7	4	1	1	2	7	2	6	6	2	2	5	NULL	5
472	I am employed / contracted / freelance	NULL	NULL	Life Sciences;Humanities / Social Sciences	Academia / university	Postdoc / Research Associate	Yes, I manage 1 person	Full-time fixed term / contract	1-2 years	NULL	Mostly human participants	41-5 hours	Had a conversation with you about your career aspirations;Provided an example of appropriate ethical codes;Connected you to others within or outside your field	2		6	1	7	2	1	3	Extremely important	Extremely important	Extremely important	Somewhat important	Neutral	Somewhat successful	Somewhat successful	Somewhat unsuccesful	Somewhat unsuccesful	Neutral	Neutral	Somewhat unsuccesful	1	2	5	4	7	7	6	7	5	4	2	3	5	2	6-1 years	6
473	I am a student	NULL	NULL	Life Sciences	NULL	NULL	NULL	NULL	NULL	Doctoral degree (PhD/DPhil/MD)	NULL	41-5 hours	Had a conversation with you about your career aspirations;Provided career advice and guidance;Discussed your performance;Noted your achievements;Supported your wellbeing;Provided expert advice;Discussed alternative career options	3	7	6	1	7	4	4	3	Extremely important	Extremely important	Extremely important	Somewhat important	Extremely successful	Somewhat successful	Extremely successful	Neutral	Neutral	Somewhat unsuccesful	Somewhat successful	Extemely unsuccesful	5	6	5	4	1	4	5	6	4	2	5	2	1	1	NULL	5
474	I am employed / contracted / freelance	NULL	NULL	Life Sciences	Not-for-profit research institute (including charity funded, research council funded etc)	Independent Fellow	Yes, I manage multiple people	Full-time permanent	NULL	NULL	Mostly wet lab – based on experimental equipment and reagents	41-5 hours	Discussed your performance;Noted your achievements;Connected you to others within or outside your field;Provided expert advice;Conducted a formal appraisal						5	5	7	Extremely important	Somewhat important	Extremely important	Extremely important	Somewhat successful	Extremely successful	Extremely successful	Somewhat successful	Somewhat successful	Somewhat successful	Extremely successful	Somewhat successful	6	6	7	4	3	2	4	5	3	7	7	3	2	6	11-2 years	6
475	I am employed / contracted / freelance	NULL	NULL	Life Sciences;Physical Sciences	Academia / university	Senior Lecturer / Associate Professor	Yes, I manage multiple people	Full-time permanent	NULL	NULL	Mostly computational	31-4 hours	Discussed your performance;Conducted a formal appraisal						1	3	1	Extremely important	Extremely important	Extremely important	Extremely important	Neutral	Somewhat successful	Somewhat successful	Somewhat successful	Somewhat unsuccesful	Somewhat unsuccesful	Neutral	Extemely unsuccesful	3	3	3	7	7	7	5	4	6	4	3	7	7	3	11-2 years	1
476	I am a student	NULL	NULL	Life Sciences	NULL	NULL	NULL	NULL	NULL	Doctoral degree (PhD/DPhil/MD)	NULL	41-5 hours	Had a conversation with you about your career aspirations;Provided career advice and guidance;Discussed your performance;Provided an example of appropriate ethical codes;Noted your achievements;Offered you training to support your skill development;Provided an example of appropriate research standards;Connected you to others within or outside your field;Supported your wellbeing;Provided expert ad…	6	7	4	4	7	6	8	3	Extremely important	Extremely important	Extremely important	Extremely important	Extremely successful	Somewhat successful	Somewhat successful	Neutral	Extremely successful	Neutral	Somewhat successful	Somewhat successful	7	7	7	6	2	5	5	6	3	6	7	2	2	6	NULL	7
477	I am employed / contracted / freelance	NULL	NULL	Life Sciences	Academia / university	Postdoc / Research Associate	Yes, I manage 1 person	Full-time fixed term / contract	1-2 years	NULL	Mostly wet lab – based on experimental equipment and reagents	51-6 hours	Had a conversation with you about your career aspirations;Provided career advice and guidance;Provided an example of appropriate ethical codes;Noted your achievements;Offered you training to support your skill development;Provided an example of appropriate research standards;Connected you to others within or outside your field;Supported you with personal issues;Supported your wellbeing;Provided e…	5	2	1	6	1	3	5	3	Extremely important	Extremely important	Extremely important	Extremely important	Neutral	Neutral	Somewhat successful	Neutral	Somewhat successful	Somewhat unsuccesful	Neutral	Somewhat unsuccesful	5	5	5	5	4	3	2	5	2	5	7	5	1	5	3-5 years	6
478	I am a student	NULL	NULL	Life Sciences	NULL	NULL	NULL	NULL	NULL	Doctoral degree (PhD/DPhil/MD)	NULL	51-6 hours	Had a conversation with you about your career aspirations;Provided career advice and guidance;Discussed your performance;Noted your achievements;Supported you with personal issues;Supported your wellbeing;Provided expert advice;Conducted a formal appraisal	7	7	6	1	7	6	8	8	Somewhat important	Extremely important	Extremely important	Somewhat important	Somewhat successful	Extemely unsuccesful	Extremely successful	Extemely unsuccesful	Somewhat successful	Extemely unsuccesful	Somewhat unsuccesful	Extemely unsuccesful	7	7	7	1	6	1	1	7	6	1	6	7	7	1	NULL	6
479	I am employed / contracted / freelance	NULL	NULL	Humanities / Social Sciences	Academia / university	Lecturer / Assistant Professor	Yes, I manage 1 person	Full-time fixed term / contract	3-5 years	NULL	Mostly human participants	41-5 hours	Had a conversation with you about your career aspirations;Provided career advice and guidance;Noted your achievements;Connected you to others within or outside your field;Supported you with personal issues;Provided expert advice;Conducted a formal appraisal						3	2	2	Extremely important	Extremely important	Extremely important	Extremely important	Somewhat successful	Somewhat successful	Somewhat successful	Somewhat successful	Somewhat successful	Somewhat successful	Somewhat successful	Somewhat successful	3	3	3	4	5	5	3	6	2	2	3	7	2	5	6-1 years	5
480	I am a student	NULL	NULL	Life Sciences	NULL	NULL	NULL	NULL	NULL	Doctoral degree (PhD/DPhil/MD)	NULL	41-5 hours	Had a conversation with you about your career aspirations;Provided career advice and guidance;Discussed your performance;Provided an example of appropriate ethical codes;Noted your achievements;Offered you training to support your skill development;Connected you to others within or outside your field;Supported you with personal issues;Supported your wellbeing;Provided expert advice;Conducted a fo…	6	7	7	1	7	5	5	5	Somewhat important	Extremely important	Extremely important	Extremely important	Extremely successful	Extremely successful	Extremely successful	Extremely successful	Somewhat successful	Somewhat unsuccesful	Somewhat successful	Extremely successful	6	7	7	4	3	1	5	7	1	5	7	3	2	6	NULL	7
481	I am a student	NULL	NULL	Life Sciences	NULL	NULL	NULL	NULL	NULL	Doctoral degree (PhD/DPhil/MD)	NULL	51-6 hours	Had a conversation with you about your career aspirations;Provided career advice and guidance;Discussed your performance;Noted your achievements;Offered you training to support your skill development;Provided expert advice;Discussed alternative career options	7	5	4	6	5	5	3	5	Extremely important	Extremely important	Extremely important	Extremely important	Somewhat successful	Somewhat successful	Somewhat successful	Somewhat successful	Somewhat successful	Somewhat unsuccesful	Somewhat successful	Extremely successful	3	5	4	8	3	5	7	4	4	2	5	3	3	5	NULL	5
482	I am a student	NULL	NULL	Life Sciences	NULL	NULL	NULL	NULL	NULL	Doctoral degree (PhD/DPhil/MD)	NULL	31-4 hours	Discussed your performance;Supported your wellbeing	5	6	5	2	6	3	5	3	Somewhat important	Extremely important	Extremely important	Somewhat important	Somewhat successful	Somewhat successful	Neutral	Somewhat unsuccesful	Somewhat successful	Neutral	Somewhat unsuccesful	Neutral	6	6	5	4	4	4	7	4	5	4	5	2	2	8	NULL	5
483	I am employed / contracted / freelance	NULL	NULL	Life Sciences	Academia / university	Professor	Yes, I manage multiple people	Full-time permanent	NULL	NULL	Mostly computational	41-5 hours	Had a conversation with you about your career aspirations;Provided an example of appropriate ethical codes;Connected you to others within or outside your field						7	8	8	Extremely important	Extremely important	Extremely important	Extremely important	Extremely successful	Extremely successful	Extremely successful	Extremely successful	I don't know	I don't know	I don't know	Extremely successful	7	7	7	4	1	1	1	7	4	7	7	4	1	4	11-2 years	4
484	I am a student	NULL	NULL	Life Sciences	NULL	NULL	NULL	NULL	NULL	Doctoral degree (PhD/DPhil/MD)	NULL	61-7 hours	None of the above	4	1	3	7	1	2	2	2	Somewhat important	Extremely important	Somewhat important	Extremely important	Extemely unsuccesful	Extemely unsuccesful	Neutral	Extemely unsuccesful	Somewhat successful	Somewhat unsuccesful	Somewhat successful	Somewhat successful	1	1	2	1	6	2	7	5	5	2	4	1	4	2	NULL	1
485	I am employed / contracted / freelance	NULL	NULL	Life Sciences	Other	Director	Yes, I manage multiple people	Full-time fixed term / contract	1-2 years	NULL	In the field	61-7 hours	Provided career advice and guidance;Discussed your performance;Noted your achievements						5	3	4	Extremely important	Extremely important	Extremely important	Extremely important	Somewhat successful	Somewhat unsuccesful	Somewhat successful	Extemely unsuccesful	Neutral	Somewhat successful	Somewhat successful	Somewhat unsuccesful	3	2	3	2	6	2	6	5	4	2	4	6	5	1	21-3 years	6
486	I am employed / contracted / freelance	NULL	NULL	Life Sciences	Academia / university	Lecturer / Assistant Professor	Yes, I manage multiple people	Full-time permanent	NULL	NULL	Mostly human participants	41-5 hours	Provided career advice and guidance;Discussed your performance;Noted your achievements;Offered you training to support your skill development;Conducted a formal appraisal						6	5	3	Somewhat important	Extremely important	Extremely important	Somewhat important	Somewhat successful	Somewhat successful	Somewhat unsuccesful	Somewhat unsuccesful	Somewhat unsuccesful	Neutral	Somewhat unsuccesful	Somewhat successful	1	5	3	5	6	6	6	3	6	4	3	6	7	5	6-1 years	3
487	I am employed / contracted / freelance	NULL	NULL	Physical Sciences	Academia / university	Postdoc / Research Associate	No	Full-time fixed term / contract	3-5 years	NULL	Mostly computational	31-4 hours	Connected you to others within or outside your field	2	6	4	1	7	4	8	4	Extremely important	Somewhat important	Extremely important	Extremely important	Somewhat successful	I don't know	I don't know	Neutral	I don't know	I don't know	I don't know	I don't know	7	2	4	4	1	1	5	5	4	3	5	1	2	4	3-5 years	5
488	I am employed / contracted / freelance	NULL	NULL	Physical Sciences	Academia / university	Professor	Yes, I manage multiple people	Full-time permanent	NULL	NULL	Mostly computational	51-6 hours	Offered you training to support your skill development;Conducted a formal appraisal						4	3	3	Extremely important	Extremely important	Extremely important	Extremely important	Somewhat successful	Somewhat successful	Extremely successful	Extremely successful	Somewhat unsuccesful	Neutral	Somewhat successful	Somewhat successful	2	6	5	4	3	4	3	5	6	2	5	6	5	4	11-2 years	6
489	I am a student	NULL	NULL	Life Sciences;Physical Sciences	NULL	NULL	NULL	NULL	NULL	Doctoral degree (PhD/DPhil/MD)	NULL	41-5 hours	Discussed your performance;Offered you training to support your skill development;Supported you with personal issues;Supported your wellbeing;Provided expert advice	6	7	5	6	5	5	3	3	Extremely important	Extremely important	Extremely important	Somewhat important	Somewhat unsuccesful	Somewhat unsuccesful	Somewhat successful	Somewhat unsuccesful	Somewhat successful	Somewhat unsuccesful	Neutral	Somewhat successful	5	5	5	4	5	5	6	5	5	6	3	8	3	6	NULL	3
490	I am employed / contracted / freelance	NULL	NULL	Physical Sciences;Humanities / Social Sciences;Other	NULL	NULL	NULL	NULL	NULL	NULL	NULL	NULL	NULL									Extremely important	Extremely important	Extremely important	Extremely important	NULL	NULL	NULL	NULL	NULL	NULL	NULL	NULL	5	4	6	5	5	3	4	5	1	7	6	7	3	7	NULL	7
491	I am employed / contracted / freelance	NULL	NULL	Humanities / Social Sciences	Academia / university	Reader	Yes, I manage multiple people	Full-time permanent	NULL	NULL	Mostly primary sources / artefacts	41-5 hours	Conducted a formal appraisal						4	5	6	Not important at all	Extremely important	Somewhat important	Extremely important	Extemely unsuccesful	Extemely unsuccesful	Neutral	Somewhat unsuccesful	Extemely unsuccesful	Extemely unsuccesful	Somewhat unsuccesful	Extemely unsuccesful	1	1	7	5	1	1	1	7	4	6	5	7	6	2	21-3 years	7
492	I am employed / contracted / freelance	NULL	NULL	Life Sciences	Academia / university	Senior Lecturer / Associate Professor	Yes, I manage multiple people	Full-time fixed term / contract	3-5 years	NULL	Mostly computational	61-7 hours	None of the above						3	1	1	Extremely important	Extremely important	Extremely important	Extremely important	Somewhat unsuccesful	Somewhat unsuccesful	Neutral	Somewhat unsuccesful	Neutral	Neutral	Neutral	Somewhat unsuccesful	1	1	2	1	7	4	2	7	1	4	3	7	7	4	6-1 years	4
493	I am employed / contracted / freelance	NULL	NULL	Life Sciences	Academia / university	Professor	Yes, I manage multiple people	Full-time permanent	NULL	NULL	Mostly wet lab – based on experimental equipment and reagents	51-6 hours	Not applicable						2	1	3	Extremely important	Extremely important	Extremely important	Extremely important	Somewhat successful	Extremely successful	Somewhat successful	Extremely successful	Somewhat unsuccesful	Somewhat successful	Extemely unsuccesful	Somewhat successful	5	6	6	3	2	2	5	3	7	1	2	7	2	1	21-3 years	7
494	I am employed / contracted / freelance	NULL	NULL	Humanities / Social Sciences	Academia / university	Postdoc / Research Associate	No	Part-time fixed term / contract	3-5 years	NULL	Mostly human participants	31-4 hours	Conducted a formal appraisal	2		4	6	5	1	1	1	Extremely important	Neutral	Extremely important	Somewhat important	Neutral	Neutral	Somewhat successful	Somewhat unsuccesful	Somewhat unsuccesful	Neutral	Somewhat unsuccesful	Somewhat unsuccesful	1	1	2	4	7	7	7	2	7	2	2	8	7	6	11-2 years	2
495	I am employed / contracted / freelance	NULL	NULL	Life Sciences	Academia / university	Lecturer / Assistant Professor	Yes, I manage multiple people	Full-time permanent	NULL	NULL	Mostly computational	51-6 hours	None of the above						2	2	5	Extremely important	Extremely important	Somewhat important	Neutral	Neutral	Somewhat unsuccesful	Somewhat unsuccesful	Somewhat unsuccesful	Somewhat unsuccesful	Somewhat unsuccesful	Somewhat unsuccesful	Somewhat unsuccesful	3	3	5	4	6	6	7	3	7	1	2	7	7	1	11-2 years	4
496	I used to be part of the research community, but no longer am	I wanted to apply my skills elsewhere;For a better work-life balance;It was impacting on my wellbeing and mental health	Less than 1 year ago	Life Sciences	NULL	NULL	NULL	NULL	NULL	NULL	NULL	NULL	NULL									Extremely important	Extremely important	Somewhat important	Extremely important	NULL	NULL	NULL	NULL	NULL	NULL	NULL	NULL	4	5	5	4	6	6	6	6	4	3	4	4	3	4	NULL	5
497	I used to be part of the research community, but no longer am	Bullying and harassment;Discrimination	1-2 years ago	Life Sciences	NULL	NULL	NULL	NULL	NULL	NULL	NULL	NULL	NULL									Extremely important	Extremely important	Extremely important	Extremely important	NULL	NULL	NULL	NULL	NULL	NULL	NULL	NULL	1	2	5	7	7	6	7	2	7	1	1	1	7	7	NULL	2
499	I am employed / contracted / freelance	NULL	NULL	Life Sciences	Academia / university	Group Leader	Yes, I manage multiple people	Full-time fixed term / contract	1-2 years	NULL	Mostly wet lab – based on experimental equipment and reagents	51-6 hours	Had a conversation with you about your career aspirations;Discussed your performance						1	4	4	Extremely important	Extremely important	Extremely important	Extremely important	Somewhat successful	Neutral	Neutral	Neutral	Extemely unsuccesful	Somewhat unsuccesful	Somewhat unsuccesful	Neutral	3	4	4	4	2	5	6	4	5	4	5	6	5	3	11-2 years	6
500	I am employed / contracted / freelance	NULL	NULL	Life Sciences	Academia / university	Professor	Yes, I manage multiple people	Full-time permanent	NULL	NULL	Mostly wet lab – based on experimental equipment and reagents	51-6 hours	Discussed your performance;Conducted a formal appraisal						3	1	2	Somewhat important	Somewhat important	Extremely important	Somewhat important	Somewhat unsuccesful	Somewhat unsuccesful	Extemely unsuccesful	Somewhat unsuccesful	Somewhat unsuccesful	Somewhat unsuccesful	Somewhat unsuccesful	Somewhat unsuccesful	3	2	5	4	5	4	5	4	5	2	4	5	4	3	21-3 years	3
501	I am employed / contracted / freelance	NULL	NULL	Life Sciences	Academia / university	Director	Yes, I manage multiple people	Full-time permanent	NULL	NULL	Mostly wet lab – based on experimental equipment and reagents	51-6 hours	Noted your achievements;Conducted a formal appraisal						1	4	6	Extremely important	Extremely important	Extremely important	Extremely important	Extremely successful	Somewhat successful	Extremely successful	Somewhat successful	Somewhat unsuccesful	Somewhat unsuccesful	Neutral	Somewhat unsuccesful	2	4	4	4	4	4	4	4	4	5	5	3	5	6	3+ years	6
502	I am retired	NULL	NULL	Humanities / Social Sciences	NULL	NULL	NULL	NULL	NULL	NULL	NULL	NULL	NULL									Somewhat important	Somewhat important	Extremely important	Extremely important	NULL	NULL	NULL	NULL	NULL	NULL	NULL	NULL															NULL
503	I am a student	NULL	NULL	Life Sciences	NULL	NULL	NULL	NULL	NULL	Doctoral degree (PhD/DPhil/MD)	NULL	31-4 hours	Had a conversation with you about your career aspirations;Provided career advice and guidance;Discussed your performance;Noted your achievements;Provided an example of appropriate research standards;Supported you with personal issues;Supported your wellbeing;Provided expert advice;Requested your feedback on their management of you	5	6	6	1	6	5	8	6	Extremely important	Extremely important	Extremely important	Extremely important	Somewhat successful	Somewhat successful	Somewhat successful	Somewhat successful	N/A	Somewhat successful	Extremely successful	Extremely successful	6	6	6	4	2	2	1	7	1	6	5	6	2	7	NULL	4
504	I am employed / contracted / freelance	NULL	NULL	Life Sciences	Academia / university	Postdoc / Research Associate	No	Full-time permanent	NULL	NULL	Mostly human participants	31-4 hours	Had a conversation with you about your career aspirations;Provided career advice and guidance;Discussed your performance;Provided an example of appropriate ethical codes;Noted your achievements;Offered you training to support your skill development;Connected you to others within or outside your field;Provided expert advice;Conducted a formal appraisal	5		6	1	6	6	6	3	Extremely important	Somewhat important	Extremely important	Somewhat important	Somewhat successful	Somewhat successful	Somewhat successful	Somewhat successful	Extremely successful	Somewhat successful	Extremely successful	Somewhat successful	6	7	6	4	2	5	4	6	3	4	6	2	2	6	6-1 years	6
505	I am employed / contracted / freelance;I am looking for work / unemployed	NULL	NULL	Life Sciences	Healthcare setting (hospital, community-based etc)	Lecturer / Assistant Professor	Yes, I manage 1 person	Full-time permanent	NULL	NULL	Mostly human participants	61-7 hours	Had a conversation with you about your career aspirations						5	4	6	Extremely important	Extremely important	Extremely important	Extremely important	Somewhat unsuccesful	Somewhat successful	Neutral	Neutral	Somewhat successful	Somewhat successful	Neutral	Somewhat successful	4	4	4	3	5	4	4	4	4	4	3	4	5	2	6-1 years	4
506	I am a student	NULL	NULL	Life Sciences	NULL	NULL	NULL	NULL	NULL	Doctoral degree (PhD/DPhil/MD)	NULL	61-7 hours	Connected you to others within or outside your field;Provided expert advice	6	3	2	7	3	1	1	1	Extremely important	Extremely important	Extremely important	Extremely important	Somewhat successful	Somewhat unsuccesful	Neutral	Extemely unsuccesful	Neutral	Extemely unsuccesful	Neutral	Somewhat unsuccesful	1	5	1	5	2	5	7	5	4	3	5	5	4	1	NULL	1
507	I am employed / contracted / freelance	NULL	NULL	Life Sciences	Academia / university	Postdoc / Research Associate	No	Full-time fixed term / contract	3-5 years	NULL	Mostly computational	41-5 hours	Had a conversation with you about your career aspirations;Provided career advice and guidance;Offered you training to support your skill development	5	7	6	2	5	4	4	3	Extremely important	Extremely important	Extremely important	Somewhat important	Somewhat successful	Neutral	Somewhat successful	Neutral	Neutral	Neutral	Somewhat successful	Somewhat unsuccesful	7	5	6	5	2	5	5	2	4	2	6	3	3	2	3-5 years	5
508	I am employed / contracted / freelance	NULL	NULL	Life Sciences	Academia / university	Senior Lecturer / Associate Professor	Yes, I manage multiple people	Full-time permanent	NULL	NULL	Mostly human participants	41-5 hours	None of the above						6	3	3	Extremely important	Extremely important	Extremely important	Extremely important	Somewhat unsuccesful	Somewhat unsuccesful	Extemely unsuccesful	Neutral	Somewhat successful	Neutral	Neutral	Somewhat successful	4	4	4	4	5	5	7	2	6	3	5	4	5	6	11-2 years	3
509	I am employed / contracted / freelance	NULL	NULL	Life Sciences	Academia / university	Postdoc / Research Associate	Yes, I manage 1 person	Full-time fixed term / contract	1-2 years	NULL	Mostly wet lab – based on experimental equipment and reagents	51-6 hours	Provided an example of appropriate ethical codes;Connected you to others within or outside your field;Supported your wellbeing;Provided expert advice;Conducted a formal appraisal	3	7	7	1	7	6	6	7	Somewhat important	Extremely important	Extremely important	Somewhat important	Somewhat successful	Extremely successful	Somewhat successful	Neutral	Somewhat successful	Somewhat successful	Somewhat successful	Somewhat successful	5	6	7	4	1	2	5	5	4	3	5	4	5	6	6-1 years	6
510	I am a student	NULL	NULL	Life Sciences	NULL	NULL	NULL	NULL	NULL	Dual doctoral degree (MD-PhD, PhD-PhD or other combination)	NULL	61-7 hours	Had a conversation with you about your career aspirations;Provided career advice and guidance;Provided an example of appropriate ethical codes;Noted your achievements;Offered you training to support your skill development;Provided an example of appropriate research standards;Connected you to others within or outside your field;Supported you with personal issues;Supported your wellbeing;Provided e…	5	7	7	2	6	5	4	5	Somewhat important	Extremely important	Extremely important	Extremely important	Somewhat successful	Extremely successful	Extremely successful	Extremely successful	Somewhat successful	Somewhat unsuccesful	Somewhat successful	Somewhat unsuccesful	6	6	6	5	3	3	4	6	5	3	5	3	4	4	NULL	3
511	I am employed / contracted / freelance	NULL	NULL	Life Sciences	Academia / university	Postdoc / Research Associate	No	Full-time fixed term / contract	1-2 years	NULL	Mostly human participants	41-5 hours	Discussed your performance;Noted your achievements;Offered you training to support your skill development;Supported you with personal issues;Supported your wellbeing;Provided expert advice	5	7	4	1	7	4	4	4	Somewhat important	Extremely important	Extremely important	Extremely important	Somewhat successful	Somewhat successful	Somewhat successful	Somewhat successful	Somewhat successful	Somewhat successful	I don't know	Extremely successful	5	4	5	4	3	2	5	5	3	6	5	3	4	7	3-5 years	5
512	I used to be part of the research community, but no longer am	My contract ended / my role was terminated;Too difficult to find a job / insecure career path;The career was too demanding;For a better work-life balance	5+ years ago	NULL	NULL	NULL	NULL	NULL	NULL	NULL	NULL	NULL	NULL									NULL	NULL	NULL	NULL	NULL	NULL	NULL	NULL	NULL	NULL	NULL	NULL															NULL
513	I am employed / contracted / freelance	NULL	NULL	Life Sciences	Not-for-profit research institute (including charity funded, research council funded etc)	Head of Department	Yes, I manage multiple people	Full-time fixed term / contract	1-2 years	NULL	Mostly human participants	51-6 hours	None of the above						3	3	2	Extremely important	Extremely important	Extremely important	Extremely important	Somewhat unsuccesful	Neutral	Neutral	Somewhat unsuccesful	Somewhat unsuccesful	Neutral	Somewhat unsuccesful	Somewhat unsuccesful	4	2	2	2	7	4	7	4	4	3	4	8	1	7	11-2 years	4
514	I am employed / contracted / freelance	NULL	NULL	Humanities / Social Sciences	Not-for-profit research institute (including charity funded, research council funded etc)	Research Assistant	Yes, I manage 1 person	Full-time fixed term / contract	Less than 1 year	NULL	Mostly human participants	41-5 hours	Discussed your performance	4			4	1	1	1	4	Extremely important	Extremely important	Extremely important	Extremely important	Somewhat unsuccesful	Neutral	Somewhat unsuccesful	Extemely unsuccesful	Extemely unsuccesful	Neutral	Somewhat unsuccesful	Somewhat unsuccesful	1	1	2	4	7	4	4	5	3	1	3	3	3	2	3-5 years	2
515	I am employed / contracted / freelance	NULL	NULL	Humanities / Social Sciences	Academia / university	Senior Lecturer / Associate Professor	Yes, I manage multiple people	Full-time permanent	NULL	NULL	Mostly primary sources / artefacts	51-6 hours	Conducted a formal appraisal						3	3	4	Somewhat important	Extremely important	Extremely important	Somewhat important	Neutral	Neutral	Somewhat successful	Somewhat unsuccesful	Neutral	Neutral	Somewhat successful	Somewhat unsuccesful	2	4	4	4	5	3	4	6	6	3	3	7	5	4	21-3 years	3
516	I am employed / contracted / freelance	NULL	NULL	Physical Sciences	Academia / university	Research Support Staff	No	Full-time fixed term / contract	3-5 years	NULL	Mostly wet lab – based on experimental equipment and reagents	41-5 hours	Had a conversation with you about your career aspirations;Provided career advice and guidance;Discussed your performance;Noted your achievements;Supported your wellbeing;Provided expert advice;Conducted a formal appraisal						6	6	6	Extremely important	Extremely important	Extremely important	Extremely important	Somewhat successful	Extremely successful	Extremely successful	Somewhat successful	Somewhat successful	Somewhat successful	Somewhat successful	Somewhat successful	3	6	6	3	1	2	2	6	2	6	7	2	2	3	11-2 years	3
517	I am employed / contracted / freelance	NULL	NULL	Humanities / Social Sciences	Academia / university	Professor	Yes, I manage multiple people	Full-time permanent	NULL	NULL	In the field	41-5 hours	Had a conversation with you about your career aspirations;Provided career advice and guidance;Discussed your performance;Noted your achievements;Offered you training to support your skill development;Conducted a formal appraisal;Requested your feedback on their management of you						6	6	5	Extremely important	Extremely important	Extremely important	Extremely important	Somewhat successful	Somewhat successful	Extremely successful	Somewhat successful	Somewhat successful	Somewhat successful	Extremely successful	Somewhat successful	6	6	6	6	2	2	2	6	5	6	6	2	2	6	21-3 years	6
518	I am a student	NULL	NULL	Life Sciences	NULL	NULL	NULL	NULL	NULL	Doctoral degree (PhD/DPhil/MD)	NULL	41-5 hours	Discussed your performance;Provided an example of appropriate ethical codes;Noted your achievements;Offered you training to support your skill development;Provided an example of appropriate research standards;Supported your wellbeing;Provided expert advice	7	7	6	1	6	2	5	1	Extremely important	Extremely important	Extremely important	Extremely important	Somewhat unsuccesful	Somewhat successful	Somewhat successful	Somewhat unsuccesful	Somewhat successful	Extemely unsuccesful	Somewhat successful	Somewhat unsuccesful	5	6	5	2	7	5	6	5	5	3	5	2	2	8	NULL	4
519	I am employed / contracted / freelance	NULL	NULL	Life Sciences	Academia / university	Senior Lecturer / Associate Professor	Yes, I manage multiple people	Full-time permanent	NULL	NULL	Mostly human participants	51-6 hours	Conducted a formal appraisal						3	1	2	Extremely important	Somewhat important	Extremely important	Extremely important	Somewhat unsuccesful	Extemely unsuccesful	Neutral	Somewhat unsuccesful	Neutral	Somewhat unsuccesful	Neutral	Somewhat unsuccesful	4	3	3	2	5	6	6	5	6	1	3	7	5	2	11-2 years	2
520	I am employed / contracted / freelance	NULL	NULL	Life Sciences;Physical Sciences;Humanities / Social Sciences	Academia / university	Professor	Yes, I manage multiple people	Full-time permanent	NULL	NULL	Mostly human participants	71-8 hours	Had a conversation with you about your career aspirations;Provided career advice and guidance;Discussed your performance;Offered you training to support your skill development;Supported you with personal issues;Provided expert advice;Conducted a formal appraisal						6	6	5	Extremely important	Extremely important	Extremely important	Extremely important	Somewhat successful	Somewhat successful	Extremely successful	Somewhat successful	Somewhat successful	Neutral	Somewhat successful	Somewhat successful	4	5	7	3	5	4	4	6	4	6	6	5	3	6	21-3 years	4
521	I am employed / contracted / freelance	NULL	NULL	Humanities / Social Sciences	Academia / university	Senior Lecturer / Associate Professor	Yes, I manage multiple people	Full-time permanent	NULL	NULL	Mostly primary sources / artefacts	71-8 hours	Had a conversation with you about your career aspirations;Provided career advice and guidance;Discussed your performance;Conducted a formal appraisal						2	6	5	Somewhat unimportant	Extremely important	Extremely important	Extremely important	N/A	Somewhat successful	Somewhat successful	Extemely unsuccesful	N/A	Somewhat successful	Somewhat successful	Extemely unsuccesful	1	5	6	5	6	6	5	3	6	3	2	7	7	6	21-3 years	5
522	I am employed / contracted / freelance	NULL	NULL	Life Sciences	Healthcare setting (hospital, community-based etc)	Other - Consultant	No	Full-time permanent	NULL	NULL	In the field	41-5 hours	Not applicable						4	4	4	Extremely important	Extremely important	Somewhat important	Extremely important	Somewhat successful	Neutral	Somewhat successful	Somewhat successful	Somewhat successful	Somewhat successful	Somewhat successful	Somewhat successful	4	4	4	4	2	3	3	5	4	5	4	6	5	2	6-1 years	5
523	I am employed / contracted / freelance	NULL	NULL	Life Sciences	Academia / university	Reader	Yes, I manage multiple people	Full-time permanent	NULL	NULL	Mostly wet lab – based on experimental equipment and reagents	51-6 hours	None of the above						1	1	1	Extremely important	Extremely important	Extremely important	Extremely important	Somewhat unsuccesful	Somewhat unsuccesful	Somewhat unsuccesful	Extemely unsuccesful	Somewhat successful	Neutral	Extemely unsuccesful	Somewhat unsuccesful	1	2	1	1	6	6	5	1	7	3	6	7	7	1	11-2 years	3
524	I am employed / contracted / freelance	NULL	NULL	Life Sciences	Academia / university	Reader	Yes, I manage multiple people	Full-time permanent	NULL	NULL	Mostly wet lab – based on experimental equipment and reagents	51-6 hours	Discussed your performance;Supported you with personal issues						2	2	1	Somewhat important	Extremely important	Extremely important	Extremely important	Somewhat unsuccesful	Neutral	Neutral	Neutral	Somewhat unsuccesful	Neutral	Neutral	Neutral	2	4	3	3	5	4	5	5	6	4	4	4	4	3	21-3 years	5
525	I used to be part of the research community, but no longer am	Too difficult to find a job / insecure career path;For a better work-life balance;Discrimination	5+ years ago	NULL	NULL	NULL	NULL	NULL	NULL	NULL	NULL	NULL	NULL									NULL	NULL	NULL	NULL	NULL	NULL	NULL	NULL	NULL	NULL	NULL	NULL															NULL
526	I am employed / contracted / freelance	NULL	NULL	Life Sciences	Academia / university	Group Leader	Yes, I manage multiple people	Full-time fixed term / contract	3-5 years	NULL	Mostly wet lab – based on experimental equipment and reagents	31-4 hours	Not applicable						4	4	4	Extremely important	Extremely important	Extremely important	Extremely important	Extremely successful	N/A	Somewhat successful	N/A	Somewhat successful	Somewhat successful	Somewhat successful	Somewhat successful	6	7	7	6	2	2	5	5	6	2	6	3	6	7	11-2 years	7
527	I am employed / contracted / freelance	NULL	NULL	Other	Academia / university	Other - Research Fellow	No	Part-time fixed term / contract	Less than 1 year	NULL	Not applicable	11-2 hours	Supported you with personal issues;Supported your wellbeing						4	1	1	Extremely important	Extremely important	Extremely important	Extremely important	Somewhat successful	Somewhat unsuccesful	Extemely unsuccesful	Extemely unsuccesful	Somewhat unsuccesful	Somewhat unsuccesful	Somewhat unsuccesful	Extemely unsuccesful	4	1	6	1	7	4	7	2	7	3	3	4	5	4	11-2 years	1
528	I am employed / contracted / freelance	NULL	NULL	Life Sciences	Academia / university	Postdoc / Research Associate	No	Full-time fixed term / contract	3-5 years	NULL	Mostly wet lab – based on experimental equipment and reagents	41-5 hours	Discussed your performance;Noted your achievements;Connected you to others within or outside your field;Conducted a formal appraisal	1	1	1	3	2	3	3	3	Extremely important	Extremely important	Extremely important	Extremely important	Extremely successful	Extremely successful	Somewhat successful	Somewhat successful	Somewhat successful	Extremely successful	Somewhat successful	Somewhat successful	3	3	5	4	4	2	5	3	5	2	2	6	3	3	3-5 years	5
529	I am employed / contracted / freelance	NULL	NULL	Life Sciences	Not-for-profit research institute (including charity funded, research council funded etc)	Postdoc / Research Associate	Yes, I manage 1 person	Full-time fixed term / contract	1-2 years	NULL	Mostly human participants	41-5 hours	Had a conversation with you about your career aspirations;Discussed your performance;Noted your achievements;Offered you training to support your skill development;Supported your wellbeing;Conducted a formal appraisal;Requested your feedback on their management of you	5	1	7	2	6	5	7	7	Extremely important	Extremely important	Extremely important	Extremely important	Extremely successful	Somewhat successful	Extremely successful	Somewhat successful	Extremely successful	Extremely successful	Extemely unsuccesful	Somewhat successful	5	6	5	4	6	2	2	7	5	5	5	7	5	7	11-2 years	3
530	I am employed / contracted / freelance	NULL	NULL	Physical Sciences	Not-for-profit research institute (including charity funded, research council funded etc)	Postdoc / Research Associate	No	Full-time fixed term / contract	1-2 years	NULL	Mostly wet lab – based on experimental equipment and reagents	51-6 hours	Conducted a formal appraisal	3	6	2	3	7	2	3	3	Extremely important	Somewhat important	Extremely important	Extremely important	Somewhat unsuccesful	Somewhat unsuccesful	Somewhat unsuccesful	Extemely unsuccesful	Somewhat successful	Neutral	Somewhat successful	Somewhat unsuccesful	4	2	6	4	6	6	5	3	6	4	5	2	3	3	11-2 years	2
531	I am employed / contracted / freelance	NULL	NULL	Life Sciences	Academia / university	Lecturer / Assistant Professor	Yes, I manage multiple people	Full-time permanent	NULL	NULL	Mostly wet lab – based on experimental equipment and reagents	41-5 hours	Had a conversation with you about your career aspirations;Supported you with personal issues;Supported your wellbeing;Conducted a formal appraisal						1	4	6	Extremely important	Extremely important	Extremely important	Extremely important	Somewhat successful	Somewhat unsuccesful	Extremely successful	Neutral	Somewhat successful	Neutral	Neutral	Neutral	5	7	6	4	6	4	5	5	7	6	5	6	6	5	21-3 years	3
532	I am employed / contracted / freelance	NULL	NULL	Humanities / Social Sciences	Academia / university	Professor	Yes, I manage multiple people	Full-time permanent	NULL	NULL	Mostly human participants	51-6 hours	Noted your achievements;Supported you with personal issues;Supported your wellbeing;Conducted a formal appraisal						5	3	7	Extremely important	Somewhat important	Extremely important	Neutral	Extremely successful	Somewhat successful	Extremely successful	Somewhat successful	Somewhat successful	Somewhat successful	Extremely successful	Neutral	3	5	5	5	3	2	3	7	4	7	5	4	6	5	3+ years	5
533	I am employed / contracted / freelance	NULL	NULL	Life Sciences	Academia / university	Postdoc / Research Associate	No	Full-time fixed term / contract	Less than 1 year	NULL	Mostly computational	41-5 hours	None of the above	2	5	5	1	3	2	1	1	Extremely important	Somewhat important	Extremely important	Extremely important	Somewhat successful	Neutral	Somewhat successful	Extemely unsuccesful	Somewhat successful	Somewhat unsuccesful	Somewhat successful	Extemely unsuccesful	5	4	2	2	4	4	6	5	7	1	4	2	4	1	6-1 years	1
534	I am employed / contracted / freelance	NULL	NULL	Life Sciences;Physical Sciences	Academia / university	Research Support Staff	No	Full-time fixed term / contract	3-5 years	NULL	Not applicable	41-5 hours	Had a conversation with you about your career aspirations;Discussed your performance;Offered you training to support your skill development;Provided an example of appropriate research standards;Conducted a formal appraisal						1	1	1	Extremely important	Extremely important	Extremely important	Extremely important	Somewhat unsuccesful	Somewhat successful	Extemely unsuccesful	Neutral	Somewhat unsuccesful	Somewhat successful	Extemely unsuccesful	Neutral	2	5	6	4	5	7	7	4	5	2	2	7	7	8	11-2 years	1
535	I am employed / contracted / freelance	NULL	NULL	Life Sciences	Academia / university	Postdoc / Research Associate	Yes, I manage multiple people	Full-time permanent	NULL	NULL	Mostly wet lab – based on experimental equipment and reagents	41-5 hours	Had a conversation with you about your career aspirations;Provided career advice and guidance;Discussed your performance;Noted your achievements;Connected you to others within or outside your field;Supported your wellbeing;Provided expert advice	2	7	7	1	7	3	2	5	Extremely important	Extremely important	Extremely important	Extremely important	Somewhat successful	Somewhat successful	Extremely successful	Neutral	Neutral	Somewhat successful	Somewhat successful	Somewhat unsuccesful	5	5	6	6	5	4	5	5	7	6	6	5	4	5	6-1 years	5
536	I am employed / contracted / freelance	NULL	NULL	Life Sciences	Academia / university	Professor	Yes, I manage multiple people	Full-time permanent	NULL	NULL	Mostly wet lab – based on experimental equipment and reagents	51-6 hours	Provided career advice and guidance;Discussed your performance;Noted your achievements;Supported your wellbeing;Provided expert advice;Conducted a formal appraisal						5	5	4	Somewhat unimportant	Not important at all	Not important at all	Somewhat unimportant	Somewhat unsuccesful	Somewhat unsuccesful	Somewhat unsuccesful	Somewhat unsuccesful	Neutral	Neutral	Somewhat successful	Neutral	2	4	5	5	4	4	5	4	7	5	5	6	6	4	3+ years	5
537	I am employed / contracted / freelance	NULL	NULL	Life Sciences	Academia / university	Postdoc / Research Associate	Other - supervise students	Full-time fixed term / contract	1-2 years	NULL	Mostly wet lab – based on experimental equipment and reagents	41-5 hours	Offered you training to support your skill development;Provided expert advice	5	6	5	5	6	2	1	3	Somewhat important	Extremely important	Extremely important	Extremely important	Somewhat successful	Somewhat successful	Somewhat successful	Somewhat unsuccesful	Neutral	Somewhat successful	Neutral	Somewhat unsuccesful	6	5	5	3	3	4	4	3	5	6	5	3	6	2	3-5 years	2
538	I am employed / contracted / freelance	NULL	NULL	Life Sciences	Academia / university	Research Technician / Officer	No	Full-time permanent	NULL	NULL	Mostly wet lab – based on experimental equipment and reagents	31-4 hours	Had a conversation with you about your career aspirations;Provided career advice and guidance;Discussed your performance;Offered you training to support your skill development;Connected you to others within or outside your field;Provided expert advice;Conducted a formal appraisal;Discussed alternative career options						4	4	4	Somewhat important	Somewhat important	Extremely important	Somewhat important	Somewhat successful	Somewhat successful	Somewhat successful	Somewhat successful	Somewhat successful	Somewhat successful	Extremely successful	Somewhat successful	4	5	5	4	6	5	3	4	3	3	3	3	4	2	Less than 1 year	3
539	I am a student	NULL	NULL	Life Sciences	NULL	NULL	NULL	NULL	NULL	Doctoral degree (PhD/DPhil/MD)	NULL	41-5 hours	Had a conversation with you about your career aspirations;Provided career advice and guidance;Discussed your performance;Supported you with personal issues;Supported your wellbeing;Provided expert advice;Conducted a formal appraisal;Discussed alternative career options	6	6	5	5	6	4	5	5	Somewhat important	Extremely important	Extremely important	Somewhat important	Somewhat successful	Extremely successful	Somewhat successful	Somewhat successful	Somewhat successful	Somewhat successful	Neutral	Somewhat successful	5	5	5	5	6	5	6	5	6	5	5	5	4	3	NULL	5
540	I am employed / contracted / freelance	NULL	NULL	Life Sciences;Physical Sciences	Academia / university	Postdoc / Research Associate	No	Full-time fixed term / contract	3-5 years	NULL	Mostly human participants	31-4 hours	Had a conversation with you about your career aspirations;Discussed your performance;Noted your achievements;Offered you training to support your skill development;Connected you to others within or outside your field;Supported your wellbeing;Provided expert advice;Conducted a formal appraisal;Discussed alternative career options	7	7	7	2	7	6	6	6	Extremely important	Extremely important	Extremely important	Somewhat important	Somewhat successful	Somewhat successful	Somewhat successful	Somewhat successful	Somewhat successful	Somewhat successful	Somewhat successful	Somewhat successful	6	6	6	4	5	3	4	7	7	4	5	4	5	5	3-5 years	5
541	I used to be part of the research community, but no longer am	Too difficult to find a job / insecure career path	5+ years ago	NULL	NULL	NULL	NULL	NULL	NULL	NULL	NULL	NULL	NULL									NULL	NULL	NULL	NULL	NULL	NULL	NULL	NULL	NULL	NULL	NULL	NULL															NULL
542	I am employed / contracted / freelance	NULL	NULL	Life Sciences	Academia / university	Reader	Yes, I manage multiple people	Full-time permanent	NULL	NULL	Mostly wet lab – based on experimental equipment and reagents	51-6 hours	Conducted a formal appraisal						1	3	3	Extremely important	Extremely important	Extremely important	Extremely important	Somewhat unsuccesful	Neutral	Somewhat successful	Somewhat unsuccesful	Neutral	Somewhat successful	Somewhat successful	Neutral	1	5	4	4	1	4	5	7	7	5	5	7	5	3	11-2 years	5
543	I am employed / contracted / freelance	NULL	NULL	Humanities / Social Sciences	Academia / university	Senior Lecturer / Associate Professor	No	Full-time permanent	NULL	NULL	Mostly human participants	31-4 hours	Had a conversation with you about your career aspirations;Noted your achievements;Offered you training to support your skill development						4	3	5	Extremely important	Extremely important	Extremely important	Extremely important	Neutral	Somewhat unsuccesful	Somewhat unsuccesful	Neutral	Neutral	Neutral	Neutral	Neutral	4	3	5	4	4	5	5	4	6	5	4	5	4	2	11-2 years	5
544	I am employed / contracted / freelance	NULL	NULL	Life Sciences	Academia / university	Reader	Yes, I manage multiple people	Full-time permanent	NULL	NULL	Mostly computational	41-5 hours	Provided career advice and guidance;Noted your achievements;Provided expert advice;Conducted a formal appraisal						5	6	6	Extremely important	Extremely important	Extremely important	Extremely important	Extremely successful	Somewhat successful	Somewhat successful	Extremely successful	Neutral	Somewhat unsuccesful	Somewhat successful	Somewhat successful	7	7	7	5	3	4	4	3	6	1	5	6	2	7	11-2 years	4
545	I am employed / contracted / freelance	NULL	NULL	Life Sciences	Academia / university	Senior Lecturer / Associate Professor	Yes, I manage multiple people	Full-time permanent	NULL	NULL	Mostly wet lab – based on experimental equipment and reagents	41-5 hours	Discussed your performance;Conducted a formal appraisal						2	3	4	Extremely important	Extremely important	Extremely important	Somewhat important	Somewhat unsuccesful	Somewhat successful	Neutral	Somewhat unsuccesful	Somewhat unsuccesful	Somewhat unsuccesful	Neutral	Somewhat unsuccesful	3	6	5	4	4	3	7	5	7	1	3	6	6	4	11-2 years	5
546	I am employed / contracted / freelance	NULL	NULL	Life Sciences;Physical Sciences	Academia / university	Group Leader	Yes, I manage multiple people	Full-time fixed term / contract	5+ years	NULL	Mostly wet lab – based on experimental equipment and reagents	51-6 hours	Had a conversation with you about your career aspirations;Provided career advice and guidance;Discussed your performance;Noted your achievements;Offered you training to support your skill development;Connected you to others within or outside your field;Supported you with personal issues;Supported your wellbeing;Provided expert advice;Conducted a formal appraisal;Requested your feedback on their m…						7	6	7	Extremely important	Extremely important	Extremely important	Extremely important	Extremely successful	Extremely successful	Extremely successful	Somewhat successful	Extremely successful	Extremely successful	Extremely successful	Somewhat successful	4	6	6	4	4	2	2	6	2	6	6	3	6	5	11-2 years	4
547	I am a student;I am employed / contracted / freelance	NULL	NULL	Life Sciences	Academia / university	Other - PhD student	No	Full-time fixed term / contract	3-5 years	Doctoral degree (PhD/DPhil/MD)	Mostly wet lab – based on experimental equipment and reagents	31-4 hours	None of the above	1	4	3	5	6	8	3	3	Extremely important	Somewhat important	Somewhat important	Somewhat important	I don't know	Neutral	Neutral	Somewhat unsuccesful	I don't know	Somewhat successful	I don't know	Neutral	4	5	4	5	4	5	5	4	6	3	4	8	5	8	3-5 years	2
548	I am retired	NULL	NULL	Humanities / Social Sciences	NULL	NULL	NULL	NULL	NULL	NULL	NULL	NULL	NULL									Somewhat important	Somewhat important	Somewhat important	Somewhat important	NULL	NULL	NULL	NULL	NULL	NULL	NULL	NULL															NULL
549	I am a student	NULL	NULL	Life Sciences	NULL	NULL	NULL	NULL	NULL	Doctoral degree (PhD/DPhil/MD)	NULL	51-6 hours	Had a conversation with you about your career aspirations	3	1	1	7	3	4	6	4	Extremely important	Extremely important	Extremely important	Extremely important	Somewhat successful	Neutral	Somewhat unsuccesful	Neutral	Somewhat successful	Somewhat successful	Somewhat successful	Somewhat successful	1	2	3	3	6	6	7	5	4	5	3	3	5	4	NULL	3
550	I am employed / contracted / freelance	NULL	NULL	Life Sciences	Academia / university	Postdoc / Research Associate	Yes, I manage multiple people	Full-time permanent	NULL	NULL	Mostly wet lab – based on experimental equipment and reagents	41-5 hours	Had a conversation with you about your career aspirations;Noted your achievements;Connected you to others within or outside your field;Conducted a formal appraisal	3	3	3	5	3	3	3	4	Extremely important	Extremely important	Extremely important	Extremely important	Somewhat successful	Somewhat successful	Somewhat successful	Somewhat successful	Somewhat successful	Somewhat successful	Somewhat successful	Somewhat successful	6	6	6	6	3	3	3	6	3	4	6	3	3	6	11-2 years	5
551	I am employed / contracted / freelance	NULL	NULL	Physical Sciences	Academia / university	Professor	Yes, I manage multiple people	Full-time permanent	NULL	NULL	Mostly computational	51-6 hours	Discussed your performance;Provided an example of appropriate ethical codes;Noted your achievements;Offered you training to support your skill development;Provided an example of appropriate research standards;Conducted a formal appraisal						7	7	7	Extremely important	Extremely important	Extremely important	Somewhat important	Extremely successful	Extremely successful	Extremely successful	Somewhat successful	Extremely successful	Extremely successful	Extremely successful	Extremely successful	6	6	6	5	1	1	1	7	1	7	7	1	1	7	3+ years	7
552	I am employed / contracted / freelance	NULL	NULL	Other	Academia / university	Senior Lecturer / Associate Professor	Yes, I manage multiple people	Full-time permanent	NULL	NULL	Mostly human participants	31-4 hours	Discussed your performance						1	2	1	Somewhat important	Extremely important	Extremely important	Extremely important	Somewhat successful	Somewhat successful	Somewhat successful	Extemely unsuccesful	Extemely unsuccesful	Extemely unsuccesful	Neutral	Extemely unsuccesful	1	1	4	1	7	6	7	4	6	1	1	6	7	4	11-2 years	4
553	I am employed / contracted / freelance	NULL	NULL	Humanities / Social Sciences	Academia / university	Postdoc / Research Associate	Yes, I manage 1 person	Full-time fixed term / contract	Less than 1 year	NULL	Mostly human participants	41-5 hours	Had a conversation with you about your career aspirations;Discussed your performance;Noted your achievements;Offered you training to support your skill development;Conducted a formal appraisal;Discussed alternative career options	2	2	6	5	4	2	2	2	Somewhat important	Extremely important	Extremely important	Somewhat important	Somewhat successful	Somewhat successful	Somewhat successful	Somewhat successful	Somewhat successful	Somewhat unsuccesful	Somewhat unsuccesful	Somewhat unsuccesful	2	6	6	6	6	6	6	5	6	4	5	5	5	6	11-2 years	2
554	I am employed / contracted / freelance	NULL	NULL	Humanities / Social Sciences	Academia / university	Other	No	Full-time fixed term / contract	1-2 years	NULL	Mostly human participants	31-4 hours	Discussed your performance;Conducted a formal appraisal						5	2	3	Extremely important	Extremely important	Extremely important	Extremely important	Somewhat unsuccesful	Somewhat unsuccesful	Somewhat unsuccesful	Somewhat unsuccesful	Somewhat unsuccesful	Somewhat unsuccesful	Somewhat unsuccesful	Somewhat unsuccesful	5	5	5	3	7	6	4	5	5	2	4	5	3	2	11-2 years	3
555	I am employed / contracted / freelance	NULL	NULL	Life Sciences	Academia / university	Head of Department	Yes, I manage multiple people	Full-time permanent	NULL	NULL	Mostly wet lab – based on experimental equipment and reagents	More than 8 hours	Offered you training to support your skill development						4	2	4	Extremely important	Neutral	Extremely important	Extremely important	Somewhat successful	Somewhat successful	Extremely successful	Somewhat unsuccesful	Somewhat successful	Somewhat successful	Somewhat successful	Somewhat unsuccesful	4	4	3	5	3	2	1	6	2	6	4	6	3	5	3+ years	6
556	I am employed / contracted / freelance	NULL	NULL	Life Sciences	Academia / university	Laboratory / Facility Manager	Yes, I manage multiple people	Full-time fixed term / contract	3-5 years	NULL	Mostly wet lab – based on experimental equipment and reagents	41-5 hours	Had a conversation with you about your career aspirations;Provided career advice and guidance;Discussed your performance;Provided an example of appropriate ethical codes;Noted your achievements;Offered you training to support your skill development;Provided an example of appropriate research standards;Connected you to others within or outside your field;Supported you with personal issues;Supporte…						3	5	3	Somewhat important	Extremely important	Extremely important	Extremely important	Somewhat successful	Somewhat successful	Extremely successful	Somewhat successful	Somewhat successful	Somewhat successful	Somewhat successful	Neutral	4	4	3	5	4	5	5	5	6	5	6	6	5	5	11-2 years	6
557	I am a student	NULL	NULL	Life Sciences;Physical Sciences	NULL	NULL	NULL	NULL	NULL	Doctoral degree (PhD/DPhil/MD)	NULL	31-4 hours	Had a conversation with you about your career aspirations;Provided career advice and guidance;Discussed your performance;Noted your achievements;Supported you with personal issues;Supported your wellbeing;Provided expert advice;Conducted a formal appraisal;Requested your feedback on their management of you	7	6	6	2	6	4	6	6	Extremely important	Extremely important	Extremely important	Extremely important	Somewhat successful	Somewhat successful	Somewhat successful	Somewhat successful	Somewhat successful	Somewhat successful	Neutral	Somewhat successful	6	6	6	4	2	2	6	4	3	5	5	2	3	5	NULL	5
558	I am a student	NULL	NULL	Humanities / Social Sciences	NULL	NULL	NULL	NULL	NULL	Doctoral degree (PhD/DPhil/MD)	NULL	11-2 hours	Supported you with personal issues;Provided expert advice;Conducted a formal appraisal	6	4	4	4	4	3	2	3	Extremely important	Extremely important	Extremely important	Extremely important	Somewhat successful	Somewhat successful	Extremely successful	I don't know	Somewhat successful	Somewhat successful	Somewhat successful	Somewhat successful	6	6	3	4	7	3	5	7	3	5	5	8	5	3	NULL	8
560	I am employed / contracted / freelance	NULL	NULL	Humanities / Social Sciences	Academia / university	Lecturer / Assistant Professor	No	Full-time fixed term / contract	1-2 years	NULL	Mostly computational	41-5 hours	Discussed your performance;Noted your achievements;Conducted a formal appraisal						3	3	3	Somewhat important	Somewhat important	Extremely important	Somewhat important	Somewhat successful	Neutral	Somewhat successful	Neutral	Somewhat successful	Neutral	Somewhat successful	Somewhat successful	6	4	4	5	3	3	3	6	3	5	5	5	4	6	3-5 years	5
561	I am a student	NULL	NULL	Humanities / Social Sciences	NULL	NULL	NULL	NULL	NULL	Master's degree (MA/MS/MSc/PSM or other master's)	NULL	NULL	NULL									NULL	NULL	NULL	NULL	NULL	NULL	NULL	NULL	NULL	NULL	NULL	NULL															NULL
562	I am employed / contracted / freelance	NULL	NULL	Life Sciences	Healthcare setting (hospital, community-based etc)	Professor	Yes, I manage multiple people	Full-time permanent	NULL	NULL	Mostly human participants	51-6 hours	None of the above						5	6	4	Extremely important	Extremely important	Extremely important	Extremely important	Somewhat successful	Extremely successful	Somewhat successful	Extremely successful	Neutral	Neutral	Neutral	Neutral	4	5	5	4	3	3	4	4	3	5	4	4	4	5	21-3 years	6
563	I am a student	NULL	NULL	Life Sciences	NULL	NULL	NULL	NULL	NULL	Doctoral degree (PhD/DPhil/MD)	NULL	31-4 hours	Had a conversation with you about your career aspirations;Provided career advice and guidance;Noted your achievements;Provided expert advice	7	6	6	2	5	4	3	4	Extremely important	Extremely important	Somewhat important	Extremely important	Somewhat unsuccesful	Somewhat successful	Neutral	Somewhat unsuccesful	Somewhat unsuccesful	Neutral	Neutral	Somewhat unsuccesful	5	4	5	4	5	4	5	3	7	2	3	2	5	4	NULL	4
564	I am retired	NULL	NULL	Life Sciences	NULL	NULL	NULL	NULL	NULL	NULL	NULL	NULL	NULL									Extremely important	Extremely important	Extremely important	Extremely important	NULL	NULL	NULL	NULL	NULL	NULL	NULL	NULL	2	2	2	2	6	6	6	4	7	2	2	6	6	7	NULL	6
565	I am employed / contracted / freelance	NULL	NULL	Life Sciences	Not-for-profit research institute (including charity funded, research council funded etc)	Head of Department	Yes, I manage multiple people	Full-time permanent	NULL	NULL	Mostly wet lab – based on experimental equipment and reagents	More than 8 hours	Had a conversation with you about your career aspirations;Provided career advice and guidance;Discussed your performance;Provided an example of appropriate ethical codes;Noted your achievements;Connected you to others within or outside your field;Provided expert advice;Conducted a formal appraisal;Discussed alternative career options						4	3	2	Extremely important	Extremely important	Extremely important	Extremely important	Extremely successful	Extremely successful	Extremely successful	Extremely successful	Neutral	Somewhat unsuccesful	Extemely unsuccesful	Somewhat unsuccesful	1	4	4	4	7	7	7	4	5	1	4	6	6	6	21-3 years	4
566	I used to be part of the research community, but no longer am	The career was too demanding;For career progression / development;For better compensation / salary;For a better work-life balance;It was impacting on my wellbeing and mental health	5+ years ago	NULL	NULL	NULL	NULL	NULL	NULL	NULL	NULL	NULL	NULL									NULL	NULL	NULL	NULL	NULL	NULL	NULL	NULL	NULL	NULL	NULL	NULL															NULL
567	I am looking for work / unemployed	NULL	NULL	Life Sciences	NULL	NULL	NULL	NULL	NULL	NULL	NULL	NULL	NULL									Extremely important	Extremely important	Extremely important	Extremely important	NULL	NULL	NULL	NULL	NULL	NULL	NULL	NULL															1-2 years
568	I am employed / contracted / freelance	NULL	NULL	Life Sciences	Academia / university	Postdoc / Research Associate	No	Part-time fixed term / contract	1-2 years	NULL	Mostly computational	21-3 hours	Discussed your performance;Supported you with personal issues;Supported your wellbeing;Conducted a formal appraisal	4	7	7	1	2	4	4	2	Extremely important	Extremely important	Extremely important	Extremely important	Extemely unsuccesful	Somewhat unsuccesful	Neutral	Extemely unsuccesful	Neutral	Neutral	Neutral	Somewhat unsuccesful	5	1	1	4	5	4	4	7	5	6	5	6	4	4	11-2 years	3
569	I am employed / contracted / freelance	NULL	NULL	Life Sciences	Academia / university	Senior Lecturer / Associate Professor	Yes, I manage multiple people	Full-time permanent	NULL	NULL	Mostly wet lab – based on experimental equipment and reagents	41-5 hours	Discussed your performance;Offered you training to support your skill development;Conducted a formal appraisal						5	2	3	Somewhat important	Extremely important	Extremely important	Somewhat important	Somewhat unsuccesful	Somewhat unsuccesful	Somewhat unsuccesful	Extemely unsuccesful	Neutral	Somewhat unsuccesful	Somewhat unsuccesful	Somewhat unsuccesful	1	4	4	2	7	4	6	3	5	2	2	7	4	5	3+ years	3
570	I am employed / contracted / freelance	NULL	NULL	Life Sciences	Academia / university	Professor	Yes, I manage multiple people	Full-time permanent	NULL	NULL	Mostly wet lab – based on experimental equipment and reagents	61-7 hours	Discussed your performance;Noted your achievements;Conducted a formal appraisal						1	1	1	Somewhat important	Extremely important	Extremely important	Extremely important	Somewhat successful	Somewhat successful	Somewhat successful	Somewhat successful	Somewhat unsuccesful	Somewhat unsuccesful	Extemely unsuccesful	Somewhat unsuccesful	4	6	6	6	4	5	5	5	6	1	6	4	3	3	3+ years	5
571	I am employed / contracted / freelance	NULL	NULL	Humanities / Social Sciences	Academia / university	Lecturer / Assistant Professor	No	Part-time fixed term / contract	Less than 1 year	NULL	Mostly human participants	41-5 hours	None of the above						5	4	2	Somewhat important	Extremely important	Somewhat important	Somewhat important	Neutral	Somewhat successful	Somewhat successful	Neutral	Somewhat successful	Somewhat successful	Neutral	Somewhat unsuccesful	5	3	3	2	6	4	4	2	2	1	2	7	7	1	6-1 years	4
572	I am a student	NULL	NULL	Humanities / Social Sciences	NULL	NULL	NULL	NULL	NULL	Doctoral degree (PhD/DPhil/MD)	NULL	51-6 hours	Had a conversation with you about your career aspirations;Provided career advice and guidance;Discussed your performance;Provided an example of appropriate ethical codes;Noted your achievements;Offered you training to support your skill development;Connected you to others within or outside your field;Provided expert advice	7				7	2	4	1	Extremely important	Extremely important	Extremely important	Extremely important	Somewhat unsuccesful	Extemely unsuccesful	Neutral	Somewhat unsuccesful	Neutral	Extemely unsuccesful	Neutral	Extemely unsuccesful	4	4	4	5	5	4	7	5	4	1	3	5	7	4	NULL	5
573	I am employed / contracted / freelance	NULL	NULL	Life Sciences;Humanities / Social Sciences	Academia / university	Postdoc / Research Associate	Yes, I manage 1 person	Full-time fixed term / contract	3-5 years	NULL	Mostly human participants	31-4 hours	Had a conversation with you about your career aspirations;Provided career advice and guidance;Supported your wellbeing;Requested your feedback on their management of you	5	7	4	2	7	3	3	4	Somewhat important	Extremely important	Extremely important	Extremely important	Extremely successful	Somewhat unsuccesful	Extremely successful	Somewhat successful	Somewhat successful	Somewhat successful	Somewhat successful	Somewhat successful	6	5	4	4	3	3	5	7	4	2	3	3	2	5	6-1 years	5
574	I am employed / contracted / freelance	NULL	NULL	Life Sciences;Physical Sciences	Academia / university	Postdoc / Research Associate	No	Full-time fixed term / contract	3-5 years	NULL	Mostly computational	31-4 hours	Had a conversation with you about your career aspirations;Provided career advice and guidance;Discussed your performance;Noted your achievements;Offered you training to support your skill development;Supported you with personal issues;Supported your wellbeing;Discussed alternative career options;Requested your feedback on their management of you	7	6	6	2	7	8	6	6	Extremely important	Extremely important	Somewhat important	Somewhat important	Extremely successful	Extremely successful	Somewhat successful	Somewhat successful	Somewhat successful	Somewhat successful	Somewhat successful	Somewhat successful	7	6	6	4	2	2	4	4	2	6	7	3	2	6	6-1 years	7
575	I am employed / contracted / freelance	NULL	NULL	Life Sciences	Academia / university	Research Support Staff	Yes, I manage multiple people	Full-time fixed term / contract	3-5 years	NULL	Mostly wet lab – based on experimental equipment and reagents	41-5 hours	Had a conversation with you about your career aspirations;Offered you training to support your skill development;Requested your feedback on their management of you						3	2	2	Somewhat important	Somewhat important	Extremely important	Extremely important	Somewhat successful	Somewhat unsuccesful	Somewhat successful	Somewhat successful	Somewhat unsuccesful	Somewhat unsuccesful	Somewhat unsuccesful	Somewhat unsuccesful	5	6	5	5	6	5	5	5	5	2	3	6	6	2	11-2 years	5
576	I am a student	NULL	NULL	Life Sciences	NULL	NULL	NULL	NULL	NULL	Doctoral degree (PhD/DPhil/MD)	NULL	61-7 hours	Had a conversation with you about your career aspirations;Provided career advice and guidance;Connected you to others within or outside your field;Provided expert advice	3	7	6	1	7	3	4	4	Extremely important	Extremely important	Extremely important	Somewhat important	Somewhat successful	Neutral	Somewhat successful	Somewhat successful	Somewhat successful	Somewhat successful	Somewhat successful	Neutral	3	3	4	1	1	4	4	4	4	3	4	1	1	5	NULL	3
577	I am employed / contracted / freelance	NULL	NULL	Life Sciences	Academia / university	Postdoc / Research Associate	Yes, I manage multiple people	Full-time permanent	NULL	NULL	Mostly wet lab – based on experimental equipment and reagents	51-6 hours	Had a conversation with you about your career aspirations;Provided career advice and guidance;Discussed your performance;Connected you to others within or outside your field;Supported you with personal issues;Provided expert advice;Conducted a formal appraisal	6	6	2	5	7	3	3	5	Extremely important	Extremely important	Extremely important	Extremely important	Somewhat successful	Somewhat unsuccesful	Somewhat successful	Somewhat successful	Somewhat unsuccesful	Extemely unsuccesful	Neutral	Somewhat unsuccesful	2	5	7	8	8	3	4	1	7	3	4	2	2	5	11-2 years	2
578	I am employed / contracted / freelance	NULL	NULL	Humanities / Social Sciences	Academia / university	Lecturer / Assistant Professor	Yes, I manage multiple people	Full-time permanent	NULL	NULL	Mostly human participants	41-5 hours	Discussed your performance;Noted your achievements;Supported you with personal issues;Conducted a formal appraisal;Requested your feedback on their management of you						3	2	4	Somewhat important	Extremely important	Extremely important	Extremely important	Somewhat successful	Somewhat successful	Somewhat successful	Somewhat successful	Neutral	Neutral	Neutral	Neutral	1	5	6	4	6	4	4	4	4	5	4	7	6	4	11-2 years	3
579	I am employed / contracted / freelance	NULL	NULL	Life Sciences;Humanities / Social Sciences	Not-for-profit research institute (including charity funded, research council funded etc)	Professor	Yes, I manage multiple people	Full-time permanent	NULL	NULL	Mostly human participants	61-7 hours	Provided career advice and guidance;Supported you with personal issues;Supported your wellbeing;Discussed alternative career options;Requested your feedback on their management of you						4	2	3	Extremely important	Extremely important	Extremely important	Extremely important	Extremely successful	Extremely successful	Extremely successful	Extremely successful	Somewhat unsuccesful	Neutral	Extremely successful	Extemely unsuccesful	7	7	7	7	4	1	4	7	2	7	7	4	2	3	11-2 years	7
580	I am employed / contracted / freelance	NULL	NULL	Life Sciences	Academia / university	Postdoc / Research Associate	Other - supervise students	Full-time fixed term / contract	Less than 1 year	NULL	Mostly wet lab – based on experimental equipment and reagents	51-6 hours	Conducted a formal appraisal	1	7	4	5	6	5	3	6	Extremely important	Somewhat important	Extremely important	Somewhat important	Neutral	Somewhat unsuccesful	Somewhat unsuccesful	Somewhat unsuccesful	Neutral	Somewhat successful	Somewhat successful	Somewhat successful	4	3	5	4	4	3	5	5	5	5	5	4	5	4	6-1 years	2
581	I am employed / contracted / freelance	NULL	NULL	Physical Sciences	Academia / university	Senior Lecturer / Associate Professor	No	Full-time permanent	NULL	NULL	Mostly wet lab – based on experimental equipment and reagents	41-5 hours	Had a conversation with you about your career aspirations;Provided career advice and guidance;Discussed your performance;Conducted a formal appraisal;Requested your feedback on their management of you						3	3	2	Not important at all	Extremely important	Somewhat unimportant	Somewhat unimportant	Somewhat successful	Somewhat successful	Somewhat unsuccesful	Somewhat unsuccesful	Extemely unsuccesful	Extremely successful	Extemely unsuccesful	Extemely unsuccesful	2	3	7	4	4	2	6	5	7	2	1	3	7	5	11-2 years	3
582	I am employed / contracted / freelance	NULL	NULL	Life Sciences	Not-for-profit research institute (including charity funded, research council funded etc)	Head of Department	Yes, I manage multiple people	Full-time fixed term / contract	3-5 years	NULL	Mostly computational	41-5 hours	Had a conversation with you about your career aspirations;Noted your achievements;Connected you to others within or outside your field;Supported you with personal issues;Supported your wellbeing						6	3	6	Extremely important	Extremely important	Extremely important	Extremely important	Somewhat successful	Somewhat successful	Somewhat successful	Somewhat successful	Extremely successful	Somewhat successful	Extremely successful	Somewhat successful	3	6	5	3	2	4	2	7	1	5	6	6	2	7	21-3 years	5
583	I am employed / contracted / freelance	NULL	NULL	Humanities / Social Sciences	Academia / university	Research Assistant	No	Full-time fixed term / contract	Less than 1 year	NULL	Mostly human participants	21-3 hours	Offered you training to support your skill development;Connected you to others within or outside your field;Supported your wellbeing	5			1	6	6	8	6	Extremely important	Extremely important	Extremely important	Somewhat unimportant	Extremely successful	I don't know	Somewhat successful	I don't know	I don't know	I don't know	I don't know	I don't know	7	7	4	8	8	2	8	8	8	6	5	8	8	8	Less than 1 year	7
584	I am employed / contracted / freelance	NULL	NULL	Life Sciences;Physical Sciences	Industrial sciences (chemicals, downstream, industrial bio-technology, polymers, coatings, advanced materials and formul	Research / Technical Specialist	No	Full-time permanent	NULL	NULL	Mostly human participants	41-5 hours	Provided career advice and guidance;Offered you training to support your skill development;Connected you to others within or outside your field;Requested your feedback on their management of you						7	6	6	Extremely important	Somewhat important	Extremely important	Extremely important	I don't know	Extremely successful	Extremely successful	Somewhat successful	Neutral	Extremely successful	Somewhat successful	I don't know	3	5	5	2	4	6	5	6	7	6	6	6	2	3	1-2 years	6
585	I am employed / contracted / freelance	NULL	NULL	Life Sciences	Academia / university	Postdoc / Research Associate	No	Full-time fixed term / contract	3-5 years	NULL	Mostly wet lab – based on experimental equipment and reagents	41-5 hours	Had a conversation with you about your career aspirations;Provided career advice and guidance;Provided an example of appropriate research standards;Connected you to others within or outside your field;Provided expert advice	4	2	4	4	7	4	4	6	Somewhat important	Extremely important	Extremely important	Somewhat important	Somewhat successful	Somewhat successful	Somewhat successful	Somewhat successful	Somewhat successful	Somewhat successful	Somewhat successful	Somewhat successful	7	4	5	4	2	2	5	7	6	6	5	4	7	6	6-1 years	4
586	I am employed / contracted / freelance	NULL	NULL	Life Sciences	Academia / university	Postdoc / Research Associate	No	Full-time fixed term / contract	3-5 years	NULL	Mostly wet lab – based on experimental equipment and reagents	51-6 hours	Discussed your performance;Conducted a formal appraisal	1	1	7	7	1	1	1	1	Extremely important	Extremely important	Extremely important	Extremely important	Extemely unsuccesful	Extemely unsuccesful	Extemely unsuccesful	Extemely unsuccesful	Extemely unsuccesful	Extemely unsuccesful	Extemely unsuccesful	Extemely unsuccesful	1	1	1	1	7	7	7	1	7	1	1	4	7	1	6-1 years	1
587	I used to be part of the research community, but no longer am	Too difficult to find a job / insecure career path;Too difficult to obtain funding;The career was too demanding	5+ years ago	NULL	NULL	NULL	NULL	NULL	NULL	NULL	NULL	NULL	NULL									NULL	NULL	NULL	NULL	NULL	NULL	NULL	NULL	NULL	NULL	NULL	NULL															NULL
588	I am employed / contracted / freelance	NULL	NULL	Humanities / Social Sciences	Academia / university	Research Assistant	No	Full-time fixed term / contract	3-5 years	NULL	Mostly human participants	61-7 hours	Had a conversation with you about your career aspirations	1	1	2	7	3	1	1	1	Extremely important	Extremely important	Extremely important	Somewhat important	Somewhat successful	Somewhat unsuccesful	Extemely unsuccesful	Extemely unsuccesful	Somewhat successful	Neutral	Somewhat successful	Somewhat unsuccesful	1	1	3	1	7	5	7	5	5	2	1	4	6	2	6-1 years	3
589	I am a student	NULL	NULL	Humanities / Social Sciences	NULL	NULL	NULL	NULL	NULL	Doctoral degree (PhD/DPhil/MD)	NULL	21-3 hours	Had a conversation with you about your career aspirations;Conducted a formal appraisal	1	7		6	7	6	4	4	Extremely important	Extremely important	Somewhat important	Extremely important	I don't know	N/A	Neutral	Neutral	Extemely unsuccesful	Somewhat unsuccesful	Neutral	Neutral	5	4	4	1	6	4	4	4	4	4	4	4	1	6	NULL	4
590	I used to be part of the research community, but no longer am	Bullying and harassment	5+ years ago	NULL	NULL	NULL	NULL	NULL	NULL	NULL	NULL	NULL	NULL									NULL	NULL	NULL	NULL	NULL	NULL	NULL	NULL	NULL	NULL	NULL	NULL															NULL
591	I am employed / contracted / freelance	NULL	NULL	Humanities / Social Sciences	Academia / university	Postdoc / Research Associate	No	Full-time fixed term / contract	3-5 years	NULL	Mostly primary sources / artefacts	31-4 hours	None of the above	1				4	2	1	1	Extremely important	Extremely important	Extremely important	Extremely important	Extemely unsuccesful	Somewhat unsuccesful	Neutral	Extemely unsuccesful	Neutral	Somewhat unsuccesful	Neutral	Neutral	4	1	3	3	4	8	8	4	5	3	6	4	5	3	11-2 years	1
593	I am employed / contracted / freelance	NULL	NULL	Life Sciences	Academia / university	Professor	Yes, I manage 1 person	Full-time permanent	NULL	NULL	Mostly wet lab – based on experimental equipment and reagents	41-5 hours	Conducted a formal appraisal						2	2	4	Extremely important	Extremely important	Extremely important	Extremely important	Somewhat successful	Neutral	Somewhat unsuccesful	Somewhat unsuccesful	Somewhat unsuccesful	Somewhat unsuccesful	Somewhat unsuccesful	Somewhat unsuccesful	1	1	1	2	7	7	7	2	7	2	3	7	7	2	3+ years	2
594	I am employed / contracted / freelance	NULL	NULL	Humanities / Social Sciences	Academia / university	Professor	Yes, I manage multiple people	Full-time permanent	NULL	NULL	Mostly human participants	51-6 hours	Discussed your performance;Provided an example of appropriate ethical codes;Conducted a formal appraisal						1	2	1	Extremely important	Extremely important	Extremely important	Extremely important	Extemely unsuccesful	Extemely unsuccesful	Somewhat successful	Extemely unsuccesful	Extemely unsuccesful	Somewhat successful	Somewhat successful	Somewhat unsuccesful	1	1	2	1	1	6	6	4	7	1	1	6	6	3	11-2 years	3
595	I am employed / contracted / freelance	NULL	NULL	Other	Academia / university	Research Technician / Officer	No	Full-time permanent	NULL	NULL	Mostly human participants	31-4 hours	Provided career advice and guidance;Offered you training to support your skill development;Discussed alternative career options						3	7	1	Extremely important	Extremely important	Extremely important	Extremely important	Neutral	Neutral	Neutral	Somewhat successful	Neutral	Neutral	Neutral	Neutral	6	2	2	2	8	4	4	6	4	2	2	5	5	8	3-5 years	1
596	I am a student	NULL	NULL	Life Sciences	NULL	NULL	NULL	NULL	NULL	Doctoral degree (PhD/DPhil/MD)	NULL	41-5 hours	Discussed your performance;Provided an example of appropriate research standards;Provided expert advice	6	7	5	4	7	5	7	4	Extremely important	Somewhat important	Somewhat important	Somewhat important	Somewhat successful	Somewhat successful	I don't know	Extremely successful	Somewhat successful	Somewhat successful	Somewhat successful	Somewhat successful	6	2	7	5	2	5	4	4	3	3	6	2	2	3	NULL	4
597	I am employed / contracted / freelance	NULL	NULL	Humanities / Social Sciences	Academia / university	Postdoc / Research Associate	No	Freelance / self-employed	NULL	NULL	Mostly human participants	41-5 hours	Had a conversation with you about your career aspirations	2				2	4	2	3	Extremely important	Extremely important	Extremely important	Extremely important	Somewhat successful	Extemely unsuccesful	Somewhat successful	Extemely unsuccesful	Somewhat successful	Somewhat unsuccesful	Somewhat successful	Somewhat unsuccesful	1	1	5	1	7	7	7	7	7	1	1	6	5	6	6-1 years	2
598	I am a student	NULL	NULL	Life Sciences	NULL	NULL	NULL	NULL	NULL	Doctoral degree (PhD/DPhil/MD)	NULL	41-5 hours	Had a conversation with you about your career aspirations;Discussed your performance;Noted your achievements;Offered you training to support your skill development;Connected you to others within or outside your field	5	3	6	6	6	3	4	2	Somewhat important	Extremely important	Extremely important	Extremely important	Neutral	Somewhat successful	Somewhat unsuccesful	Neutral	Somewhat unsuccesful	Neutral	Somewhat unsuccesful	Somewhat unsuccesful	1	2	5	5	7	7	7	2	2	2	2	7	7	4	NULL	2
599	I am employed / contracted / freelance	NULL	NULL	Life Sciences	Academia / university	Postdoc / Research Associate	Yes, I manage 1 person	Full-time fixed term / contract	3-5 years	NULL	Mostly wet lab – based on experimental equipment and reagents	51-6 hours	Discussed your performance	4	3	4	4	7	2	2	4	Extremely important	Somewhat important	Extremely important	Extremely important	Somewhat unsuccesful	Somewhat unsuccesful	Somewhat successful	Neutral	Neutral	Extremely successful	Somewhat successful	Neutral	5	3	3	3	4	4	4	5	6	5	5	3	3	4	6-1 years	5
600	I am employed / contracted / freelance	NULL	NULL	Humanities / Social Sciences	Academia / university	Lecturer / Assistant Professor	Yes, I manage multiple people	Full-time permanent	NULL	NULL	Mostly human participants	41-5 hours	Noted your achievements						5	4	3	Somewhat unimportant	Somewhat important	Somewhat important	Neutral	Somewhat successful	Somewhat successful	Extremely successful	Somewhat successful	Somewhat successful	Neutral	Somewhat successful	Neutral	6	7	7	6	2	1	5	3	4	4	6	6	5	4	3-5 years	5
601	I am employed / contracted / freelance	NULL	NULL	Life Sciences	Academia / university	Postdoc / Research Associate	No	Full-time permanent	NULL	NULL	Mostly human participants	31-4 hours	Had a conversation with you about your career aspirations;Provided career advice and guidance;Noted your achievements;Supported your wellbeing;Conducted a formal appraisal	4	6	6	1	7	4	3	4	Somewhat important	Extremely important	Extremely important	Extremely important	Somewhat successful	Somewhat unsuccesful	Somewhat successful	Somewhat unsuccesful	Somewhat unsuccesful	Somewhat unsuccesful	Neutral	Extemely unsuccesful	6	1	4	5	7	7	4	5	7	3	4	1	4	6	6-1 years	3
602	I am employed / contracted / freelance	NULL	NULL	Life Sciences	Academia / university	Postdoc / Research Associate	Yes, I manage 1 person	Full-time fixed term / contract	3-5 years	NULL	Mostly wet lab – based on experimental equipment and reagents	41-5 hours	Discussed your performance;Supported you with personal issues;Supported your wellbeing;Conducted a formal appraisal	2	4	3	5	3	4	6	4	Extremely important	Extremely important	Extremely important	Somewhat important	Somewhat successful	Extremely successful	Extremely successful	Somewhat unsuccesful	Somewhat successful	Somewhat successful	Somewhat successful	Somewhat unsuccesful	2	4	2	5	6	4	5	7	5	1	2	4	2	4	6-1 years	2
603	I am a student	NULL	NULL	Life Sciences	NULL	NULL	NULL	NULL	NULL	Doctoral degree (PhD/DPhil/MD)	NULL	41-5 hours	Provided career advice and guidance;Discussed your performance;Noted your achievements;Offered you training to support your skill development;Provided an example of appropriate research standards;Connected you to others within or outside your field;Supported you with personal issues;Supported your wellbeing;Provided expert advice;Requested your feedback on their management of you	7	7	5	2	6	3	2	4	Somewhat important	Extremely important	Extremely important	Extremely important	Somewhat successful	Neutral	Somewhat successful	Neutral	Extremely successful	Neutral	Neutral	Somewhat unsuccesful	3	7	6	4	5	3	5	7	5	4	6	2	1	5	NULL	5
604	I am employed / contracted / freelance	NULL	NULL	Life Sciences	Not-for-profit research institute (including charity funded, research council funded etc)	Postdoc / Research Associate	No	Full-time fixed term / contract	Less than 1 year	NULL	Mostly wet lab – based on experimental equipment and reagents	41-5 hours	Provided expert advice	3	6	3	3	4	1	2	1	Extremely important	Extremely important	Extremely important	Somewhat important	Somewhat successful	Neutral	Somewhat successful	Extemely unsuccesful	Somewhat successful	Neutral	Somewhat successful	Somewhat unsuccesful	2	2	2	4	5	2	5	2	5	1	2	1	4	4	11-2 years	3
605	I am employed / contracted / freelance	NULL	NULL	Life Sciences	Academia / university	Lecturer / Assistant Professor	Yes, I manage multiple people	Full-time permanent	NULL	NULL	Mostly wet lab – based on experimental equipment and reagents	41-5 hours	Discussed your performance;Noted your achievements;Offered you training to support your skill development;Conducted a formal appraisal						5	5	6	Extremely important	Extremely important	Extremely important	Extremely important	Somewhat successful	Somewhat successful	Extremely successful	Somewhat successful	Somewhat successful	Extremely successful	Extremely successful	Somewhat successful	6	5	6	4	2	2	3	6	2	6	6	2	2	6	11-2 years	5
606	I am employed / contracted / freelance	NULL	NULL	Life Sciences	Academia / university	Lecturer / Assistant Professor	Yes, I manage multiple people	Full-time permanent	NULL	NULL	Mostly wet lab – based on experimental equipment and reagents	41-5 hours	None of the above						2	2	2	Extremely important	Extremely important	Extremely important	Extremely important	Somewhat successful	Somewhat successful	Extremely successful	Extremely successful	Somewhat unsuccesful	Somewhat unsuccesful	Extemely unsuccesful	Somewhat unsuccesful	4	4	4	3	7	4	6	5	4	1	3	7	3	4	21-3 years	2
607	I am employed / contracted / freelance	NULL	NULL	Humanities / Social Sciences	Academia / university	Senior Lecturer / Associate Professor	Yes, I manage 1 person	Full-time permanent	NULL	NULL	Mostly human participants	31-4 hours	Noted your achievements;Connected you to others within or outside your field;Supported your wellbeing						4	4	5	Somewhat important	Extremely important	Extremely important	Extremely important	Extremely successful	Extremely successful	Somewhat successful	Neutral	Somewhat successful	Somewhat successful	Somewhat successful	Neutral	5	4	4	6	2	4	4	4	4	3	3	6	4	4	11-2 years	5
608	I am employed / contracted / freelance	NULL	NULL	Life Sciences	Academia / university	Professor	Yes, I manage multiple people	Full-time permanent	NULL	NULL	Mostly wet lab – based on experimental equipment and reagents	51-6 hours	Conducted a formal appraisal						6	6	6	Somewhat important	Extremely important	Extremely important	Somewhat important	Extremely successful	Extremely successful	Extremely successful	Somewhat successful	Extremely successful	Extremely successful	Extremely successful	Somewhat successful	4	6	5	4	2	4	4	7	2	5	7	3	1	6	21-3 years	7
609	I am employed / contracted / freelance	NULL	NULL	Humanities / Social Sciences	Academia / university	Senior Lecturer / Associate Professor	Yes, I manage multiple people	Full-time permanent	NULL	NULL	Mostly human participants	31-4 hours	Noted your achievements;Offered you training to support your skill development;Provided an example of appropriate research standards;Connected you to others within or outside your field;Supported you with personal issues;Provided expert advice;Requested your feedback on their management of you						6	5	7	Extremely important	Somewhat important	Somewhat important	Extremely important	Somewhat successful	Somewhat successful	Somewhat successful	Somewhat successful	Somewhat successful	Somewhat successful	Somewhat successful	Extremely successful	5	7	7	6	1	1	2	7	1	7	5	6	1	6	11-2 years	7
610	I am employed / contracted / freelance	NULL	NULL	Life Sciences	Academia / university	Independent Fellow	Yes, I manage 1 person	Full-time fixed term / contract	3-5 years	NULL	Mostly wet lab – based on experimental equipment and reagents	41-5 hours	Provided career advice and guidance;Discussed your performance;Noted your achievements;Provided expert advice;Conducted a formal appraisal						4	2	5	Somewhat important	Extremely important	Extremely important	Extremely important	Somewhat successful	Somewhat successful	Somewhat unsuccesful	Neutral	Extemely unsuccesful	Somewhat unsuccesful	Extemely unsuccesful	Neutral	1	1	3	3	7	7	7	2	7	2	3	2	2	6	6-1 years	4
611	I am employed / contracted / freelance	NULL	NULL	Life Sciences;Physical Sciences	Life sciences industry (pharmaceuticals, biotechnology, medical technology and consumer healthcare)	Research / Technical Specialist	Yes, I manage multiple people	Full-time permanent	NULL	NULL	Mostly wet lab – based on experimental equipment and reagents	41-5 hours	Had a conversation with you about your career aspirations;Provided career advice and guidance;Discussed your performance;Provided an example of appropriate ethical codes;Noted your achievements;Supported you with personal issues;Supported your wellbeing						3	1	2	Somewhat important	Extremely important	Extremely important	Extremely important	Somewhat successful	Somewhat successful	Somewhat successful	Somewhat unsuccesful	Neutral	Neutral	Somewhat unsuccesful	Somewhat unsuccesful	2	6	5	4	2	5	6	4	4	5	4	7	5	8	6-1 years	5
612	I am a student	NULL	NULL	Life Sciences	NULL	NULL	NULL	NULL	NULL	Doctoral degree (PhD/DPhil/MD)	NULL	51-6 hours	Discussed your performance;Offered you training to support your skill development;Connected you to others within or outside your field;Supported your wellbeing;Provided expert advice	6	5	6	3	6	5	5	4	Extremely important	Extremely important	Extremely important	Extremely important	Somewhat successful	Somewhat successful	Somewhat successful	Neutral	Somewhat successful	Somewhat unsuccesful	Somewhat successful	Somewhat unsuccesful	5	5	4	3	1	2	3	7	3	5	6	3	2	5	NULL	5
613	I am employed / contracted / freelance	NULL	NULL	Life Sciences	Academia / university	Group Leader	Yes, I manage multiple people	Part-time fixed term / contract	Less than 1 year	NULL	Mostly wet lab – based on experimental equipment and reagents	31-4 hours	Had a conversation with you about your career aspirations;Provided career advice and guidance;Discussed your performance;Provided an example of appropriate ethical codes;Noted your achievements;Provided expert advice;Conducted a formal appraisal;Discussed alternative career options						5	5	5	Extremely important	Extremely important	Extremely important	Extremely important	Neutral	Neutral	Neutral	Neutral	Neutral	Extemely unsuccesful	Somewhat unsuccesful	Somewhat unsuccesful	3	5	6	5	3	3	5	5	1	3	5	1	1	5	11-2 years	5
614	I am employed / contracted / freelance	NULL	NULL	Life Sciences;Humanities / Social Sciences	Academia / university	Postdoc / Research Associate	No	Full-time fixed term / contract	3-5 years	NULL	Mostly human participants	41-5 hours	Had a conversation with you about your career aspirations;Discussed your performance;Supported you with personal issues;Supported your wellbeing;Conducted a formal appraisal;Discussed alternative career options	3	7	7	3	7	1	1	4	Extremely important	Extremely important	Extremely important	Extremely important	Somewhat successful	Somewhat unsuccesful	Extremely successful	Somewhat unsuccesful	Extremely successful	Extemely unsuccesful	Somewhat successful	Somewhat unsuccesful	6	7	5	5	3	3	4	5	5	1	3	3	2	6	6-1 years	1
615	I am employed / contracted / freelance	NULL	NULL	Humanities / Social Sciences	Academia / university	Senior Lecturer / Associate Professor	No	Full-time fixed term / contract	3-5 years	NULL	Mostly human participants	51-6 hours	Discussed your performance;Noted your achievements;Offered you training to support your skill development;Supported you with personal issues;Provided expert advice;Conducted a formal appraisal;Discussed alternative career options						6	5	6	Extremely important	Extremely important	Neutral	Extremely important	Neutral	Somewhat successful	Neutral	Somewhat successful	Somewhat successful	Somewhat successful	Extremely successful	I don't know	4	3	3	1	1	4	5	5	4	1	3	7	4	1	21-3 years	3
616	I am a student	NULL	NULL	Life Sciences	NULL	NULL	NULL	NULL	NULL	Doctoral degree (PhD/DPhil/MD)	NULL	71-8 hours	Had a conversation with you about your career aspirations;Provided career advice and guidance;Provided an example of appropriate ethical codes;Offered you training to support your skill development;Provided an example of appropriate research standards;Supported your wellbeing;Provided expert advice	5	7	4	1	5	6	6	6	Extremely important	Extremely important	Extremely important	Extremely important	Somewhat successful	Extremely successful	Extremely successful	Somewhat successful	Extremely successful	Extremely successful	Extremely successful	Extremely successful	2	7	7	7	3	2	5	7	2	6	7	3	3	5	NULL	5
617	I am a student	NULL	NULL	Life Sciences	NULL	NULL	NULL	NULL	NULL	Doctoral degree (PhD/DPhil/MD)	NULL	41-5 hours	Had a conversation with you about your career aspirations;Discussed your performance	7	6	3	5	6	5	3	5	Extremely important	Extremely important	Somewhat important	Extremely important	Neutral	Somewhat unsuccesful	Somewhat successful	Somewhat successful	Somewhat successful	Extremely successful	Somewhat successful	Somewhat successful	5	5	5	6	6	6	7	5	7	5	6	6	6	6	NULL	3
618	I am a student	NULL	NULL	Life Sciences	NULL	NULL	NULL	NULL	NULL	Doctoral degree (PhD/DPhil/MD)	NULL	41-5 hours	Discussed your performance;Conducted a formal appraisal	6	5	6	5	3	5	4	5	Extremely important	Extremely important	Extremely important	Extremely important	Somewhat successful	Somewhat successful	Somewhat successful	Somewhat unsuccesful	Neutral	Neutral	Neutral	Extremely successful	4	4	4	4	4	4	4	4	4	3	4	3	3	4	NULL	5
619	I am a student;I am employed / contracted / freelance	NULL	NULL	Life Sciences	Not-for-profit research institute (including charity funded, research council funded etc)	Research Assistant	No	Part-time fixed term / contract	Less than 1 year	Doctoral degree (PhD/DPhil/MD)	Mostly computational	41-5 hours	None of the above	1	1	1	7	4	1	5	1	Extremely important	Somewhat important	Extremely important	Somewhat important	Somewhat successful	Neutral	Neutral	Somewhat unsuccesful	Somewhat successful	Extremely successful	Extremely successful	Neutral	3	3	1	3	4	4	7	4	4	5	5	4	4	6	6-1 years	7
620	I am a student	NULL	NULL	Physical Sciences	NULL	NULL	NULL	NULL	NULL	Doctoral degree (PhD/DPhil/MD)	NULL	More than 8 hours	Provided career advice and guidance;Discussed your performance;Noted your achievements;Offered you training to support your skill development;Supported you with personal issues;Supported your wellbeing;Provided expert advice;Requested your feedback on their management of you	7	4	6	1		5	7	6	Extremely important	Somewhat important	Somewhat important	Somewhat important	Somewhat successful	Somewhat successful	Neutral	Somewhat successful	Somewhat successful	Somewhat successful	Neutral	Somewhat successful	7	6	5	1	1	2	1	6	2	6	5	4	1	6	NULL	5
621	I am a student	NULL	NULL	Physical Sciences	NULL	NULL	NULL	NULL	NULL	Doctoral degree (PhD/DPhil/MD)	NULL	61-7 hours	Had a conversation with you about your career aspirations;Provided career advice and guidance;Discussed your performance;Provided an example of appropriate ethical codes;Noted your achievements;Offered you training to support your skill development;Provided an example of appropriate research standards;Connected you to others within or outside your field;Supported you with personal issues;Conducte…	5	5	5	5	5	5	5	5	Somewhat important	Somewhat important	Somewhat important	Somewhat important	Somewhat successful	Somewhat successful	Somewhat successful	Somewhat successful	Somewhat successful	Somewhat successful	Somewhat successful	Somewhat successful	5	5	5	5	5	5	5	5	5	5	5	5	5	5	NULL	5
622	I am employed / contracted / freelance	NULL	NULL	Life Sciences	Academia / university	Dean	Yes, I manage multiple people	Full-time permanent	NULL	NULL	Other - a mixture of above	41-5 hours	Discussed your performance;Provided an example of appropriate ethical codes;Noted your achievements;Offered you training to support your skill development;Supported you with personal issues;Provided expert advice;Conducted a formal appraisal						8	4	4	Somewhat important	Extremely important	Extremely important	Extremely important	Somewhat successful	Somewhat successful	Somewhat successful	Somewhat successful	Somewhat successful	Somewhat successful	Somewhat successful	Somewhat successful	4	5	5	4	2	1	4	6	1	7	5	5	2	6	3+ years	6
623	I am a student	NULL	NULL	Life Sciences	NULL	NULL	NULL	NULL	NULL	Doctoral degree (PhD/DPhil/MD)	NULL	51-6 hours	Provided an example of appropriate ethical codes;Provided expert advice	6	5	5	5	2	7	8	6	Somewhat important	Extremely important	Extremely important	Somewhat important	Somewhat successful	Neutral	Somewhat successful	Extemely unsuccesful	Somewhat successful	Somewhat successful	Extremely successful	Extremely successful	1	5	3	4	7	2	3	7	3	6	1	1	1	7	NULL	3
624	I am a student	NULL	NULL	Life Sciences	NULL	NULL	NULL	NULL	NULL	Doctoral degree (PhD/DPhil/MD)	NULL	51-6 hours	Had a conversation with you about your career aspirations;Provided career advice and guidance;Supported you with personal issues;Provided expert advice	2	4	5	6	7	2	3	1	Extremely important	Extremely important	I don't know	Somewhat important	Somewhat successful	Neutral	Neutral	Neutral	Somewhat successful	Somewhat successful	Somewhat unsuccesful	Somewhat unsuccesful	3	3	5	5	6	5	7	3	3	3	4	6	4	1	NULL	4
625	I am a student	NULL	NULL	Physical Sciences	NULL	NULL	NULL	NULL	NULL	Doctoral degree (PhD/DPhil/MD)	NULL	31-4 hours	Noted your achievements;Connected you to others within or outside your field;Provided expert advice	3	3	6	1	6	4	3	2	Somewhat important	Extremely important	Somewhat important	Extremely important	Somewhat unsuccesful	Neutral	Somewhat successful	Neutral	Somewhat unsuccesful	Neutral	Neutral	Neutral	5	3	6	4	3	2	3	5	5	2	4	5	5	4	NULL	5
626	I am a student	NULL	NULL	Life Sciences	NULL	NULL	NULL	NULL	NULL	Doctoral degree (PhD/DPhil/MD)	NULL	41-5 hours	Discussed your performance;Provided an example of appropriate ethical codes;Supported you with personal issues;Conducted a formal appraisal	7	7	6	1	3	6	5	6	Extremely important	Somewhat important	Extremely important	Neutral	Somewhat successful	Somewhat successful	Neutral	Somewhat unsuccesful	Neutral	Somewhat successful	Somewhat successful	Somewhat successful	3	4	6	3	5	7	7	5	8	5	5	8	2	3	NULL	5
627	I am a student	NULL	NULL	Physical Sciences	NULL	NULL	NULL	NULL	NULL	Doctoral degree (PhD/DPhil/MD)	NULL	Less than 11 hours	Provided expert advice	7	7	7	1	7	7	7	7	Extremely important	Somewhat important	Extremely important	Extremely important	Extremely successful	Extremely successful	Extremely successful	Extremely successful	Extremely successful	Extremely successful	Extremely successful	Extremely successful	7	7	7	7	7	7	7	7	7	7	7	7	7	7	NULL	7
628	I am employed / contracted / freelance	NULL	NULL	Life Sciences	Academia / university	Independent Fellow	Yes, I manage multiple people	Full-time fixed term / contract	3-5 years	NULL	Mostly computational	51-6 hours	Provided career advice and guidance;Discussed your performance;Noted your achievements;Supported you with personal issues;Conducted a formal appraisal						5	5	4	Extremely important	Extremely important	Extremely important	Extremely important	Extremely successful	Extremely successful	Extremely successful	Somewhat successful	Neutral	Neutral	Neutral	Somewhat unsuccesful	3	3	4	4	3	2	3	6	3	5	5	4	3	5	11-2 years	4
629	I am a student	NULL	NULL	Life Sciences	NULL	NULL	NULL	NULL	NULL	Doctoral degree (PhD/DPhil/MD)	NULL	51-6 hours	Provided career advice and guidance;Noted your achievements;Supported your wellbeing	7	6	5	2	7	6	5	5	Extremely important	Extremely important	Extremely important	Extremely important	Extremely successful	Somewhat successful	Extremely successful	Somewhat successful	Somewhat successful	Neutral	Somewhat successful	Neutral	3	3	5	4	4	4	4	5	5	5	4	5	4	4	NULL	6
630	I used to be part of the research community, but no longer am	For career progression / development	Less than 1 year ago	Humanities / Social Sciences	NULL	NULL	NULL	NULL	NULL	NULL	NULL	NULL	NULL									Extremely important	Somewhat important	Extremely important	Extremely important	NULL	NULL	NULL	NULL	NULL	NULL	NULL	NULL	6	6	3	3	6	4	4	6	4	4	5	8	8	8	NULL	8
631	I am employed / contracted / freelance	NULL	NULL	Life Sciences	Academia / university	Postdoc / Research Associate	No	Full-time fixed term / contract	1-2 years	NULL	Mostly wet lab – based on experimental equipment and reagents	41-5 hours	Discussed your performance;Conducted a formal appraisal	2	1	2	2	4	4	6	3	Extremely important	Extremely important	Extremely important	Extremely important	Somewhat successful	Somewhat successful	Somewhat successful	Somewhat unsuccesful	Somewhat unsuccesful	Somewhat unsuccesful	Somewhat successful	Extemely unsuccesful	4	6	6	4	7	5	4	6	7	3	5	7	6	3	11-2 years	5
632	I am a student	NULL	NULL	Life Sciences	NULL	NULL	NULL	NULL	NULL	Doctoral degree (PhD/DPhil/MD)	NULL	61-7 hours	Discussed your performance;Noted your achievements	4	6	4	7	4	3	4	1	Extremely important	Extremely important	Extremely important	Somewhat important	Extemely unsuccesful	Extemely unsuccesful	Somewhat unsuccesful	Somewhat unsuccesful	Neutral	Extemely unsuccesful	Neutral	Extemely unsuccesful	1	1	1	1	7	6	6	2	6	3	3	4	3	1	NULL	4
633	I am employed / contracted / freelance	NULL	NULL	Life Sciences	Academia / university	Postdoc / Research Associate	Yes, I manage multiple people	Full-time permanent	NULL	NULL	Mostly wet lab – based on experimental equipment and reagents	51-6 hours	None of the above	1	7	7	1		1	1	1	Extremely important	Extremely important	Extremely important	Extremely important	Extemely unsuccesful	Extemely unsuccesful	Somewhat successful	Extemely unsuccesful	Extemely unsuccesful	Extemely unsuccesful	Somewhat successful	Extemely unsuccesful	4	4	4	4	1	4	4	7	4	1	4	4	4	4	21-3 years	1
634	I am a student	NULL	NULL	Life Sciences;Physical Sciences	NULL	NULL	NULL	NULL	NULL	Doctoral degree (PhD/DPhil/MD)	NULL	51-6 hours	Had a conversation with you about your career aspirations;Noted your achievements;Connected you to others within or outside your field;Supported you with personal issues;Provided expert advice;Conducted a formal appraisal	6	6	4	5	7	4	5	5	Extremely important	Neutral	Somewhat important	Somewhat important	Somewhat successful	Extremely successful	Neutral	Somewhat unsuccesful	Extremely successful	Extremely successful	Somewhat successful	Extemely unsuccesful	2	6	5	1	1	4	5	6	6	4	4	3	3	3	NULL	5
635	I am employed / contracted / freelance	NULL	NULL	Life Sciences	Academia / university	Postdoc / Research Associate	Yes, I manage multiple people	Full-time fixed term / contract	3-5 years	NULL	Mostly computational	31-4 hours	Discussed your performance;Noted your achievements;Offered you training to support your skill development;Supported your wellbeing;Conducted a formal appraisal	5	6	6	2	6	2	1	1	Extremely important	Extremely important	Extremely important	Extremely important	Somewhat successful	Somewhat successful	Somewhat successful	Somewhat successful	Somewhat successful	Somewhat unsuccesful	Neutral	Extemely unsuccesful	5	5	3	4	5	5	6	3	5	1	3	7	7	6	21-3 years	5
636	I am a student	NULL	NULL	Life Sciences	NULL	NULL	NULL	NULL	NULL	Doctoral degree (PhD/DPhil/MD)	NULL	61-7 hours	Discussed your performance;Supported you with personal issues;Supported your wellbeing;Provided expert advice;Conducted a formal appraisal	7	3	6	5	4	4	6	7	Extremely important	Extremely important	Extremely important	Somewhat important	Somewhat successful	Somewhat successful	Extremely successful	Somewhat unsuccesful	Neutral	Somewhat successful	Extremely successful	Neutral	3	6	6	5	5	5	8	7	2	7	6	3	2	8	NULL	4
637	I am a student	NULL	NULL	Life Sciences	NULL	NULL	NULL	NULL	NULL	Doctoral degree (PhD/DPhil/MD)	NULL	31-4 hours	Provided career advice and guidance;Discussed your performance;Noted your achievements;Provided an example of appropriate research standards;Connected you to others within or outside your field;Supported your wellbeing;Provided expert advice	5	5	5	6	2	1	1	3	Somewhat important	Extremely important	Somewhat important	Somewhat important	Extremely successful	Somewhat unsuccesful	Somewhat successful	Neutral	Extremely successful	Somewhat unsuccesful	Somewhat unsuccesful	Somewhat unsuccesful	4	2	2	2	5	7	7	2	7	1	1	1	1	2	NULL	5
638	I am employed / contracted / freelance	NULL	NULL	Life Sciences	Academia / university	Postdoc / Research Associate	No	Full-time fixed term / contract	1-2 years	NULL	Mostly computational	41-5 hours	Provided career advice and guidance;Discussed your performance;Noted your achievements;Offered you training to support your skill development;Connected you to others within or outside your field;Supported your wellbeing;Provided expert advice	5	7	6	1	6	6	8	4	Extremely important	Extremely important	Extremely important	Extremely important	Extremely successful	Somewhat successful	Extremely successful	Somewhat successful	Extremely successful	Extremely successful	Extremely successful	Somewhat successful	6	7	7	6	1	1	2	6	1	6	7	3	1	7	6-1 years	5
639	I am a student	NULL	NULL	Life Sciences	NULL	NULL	NULL	NULL	NULL	Doctoral degree (PhD/DPhil/MD)	NULL	51-6 hours	Provided career advice and guidance;Discussed your performance;Noted your achievements;Offered you training to support your skill development;Provided an example of appropriate research standards;Connected you to others within or outside your field;Supported your wellbeing;Provided expert advice;Requested your feedback on their management of you	6	7	6	7	6	8	8	8	Extremely important	Extremely important	Somewhat important	Somewhat important	Extremely successful	Extremely successful	Somewhat successful	N/A	N/A	N/A	N/A	N/A	6	7	5	5	1	2	4	6	2	6	6	2	2	6	NULL	8
640	I am a student	NULL	NULL	Life Sciences	NULL	NULL	NULL	NULL	NULL	Doctoral degree (PhD/DPhil/MD)	NULL	31-4 hours	Discussed your performance;Offered you training to support your skill development;Provided an example of appropriate research standards;Supported you with personal issues;Supported your wellbeing	5	7	7	3	5	4	8	5	Somewhat important	Extremely important	Somewhat important	Neutral	Somewhat successful	Extremely successful	Extremely successful	Neutral	Somewhat successful	Somewhat successful	Somewhat successful	Neutral	5	6	6	4	3	2	3	7	3	4	5	3	3	4	NULL	5
641	I am a student	NULL	NULL	Life Sciences	NULL	NULL	NULL	NULL	NULL	Doctoral degree (PhD/DPhil/MD)	NULL	41-5 hours	Had a conversation with you about your career aspirations;Noted your achievements;Offered you training to support your skill development;Connected you to others within or outside your field;Provided expert advice	5	7	6	1	7	5	8	6	Extremely important	Somewhat important	Somewhat important	Neutral	Extremely successful	Extremely successful	Somewhat successful	Neutral	Somewhat successful	Somewhat successful	Somewhat successful	Extremely successful	7	7	6	4	1	1	3	6	2	5	6	1	1	7	NULL	6
642	I am a student;I am employed / contracted / freelance	NULL	NULL	Physical Sciences	Academia / university	Research Assistant	No	Full-time fixed term / contract	3-5 years	Doctoral degree (PhD/DPhil/MD)	Mostly computational	31-4 hours	Had a conversation with you about your career aspirations;Provided career advice and guidance;Discussed your performance;Noted your achievements;Provided an example of appropriate research standards;Connected you to others within or outside your field;Supported you with personal issues;Provided expert advice	7	6	4	5	5	5	5	5	Extremely important	Extremely important	Extremely important	Extremely important	Somewhat successful	Neutral	Somewhat successful	Somewhat unsuccesful	Somewhat successful	Extremely successful	Somewhat successful	Somewhat successful	7	6	7	5	1	3	2	6	1	5	5	2	3	4	3-5 years	4
643	I am a student;I am employed / contracted / freelance	NULL	NULL	Life Sciences	Academia / university	Research Assistant	Yes, I manage multiple people	Freelance / self-employed	NULL	Master's degree (MA/MS/MSc/PSM or other master's)	Mostly wet lab – based on experimental equipment and reagents	41-5 hours	Discussed your performance;Provided an example of appropriate ethical codes;Provided an example of appropriate research standards;Connected you to others within or outside your field	2	4	5	2	5	4	3	2	Extremely important	Extremely important	Somewhat important	Somewhat important	Extremely successful	Somewhat successful	Somewhat successful	Somewhat successful	Somewhat successful	Somewhat successful	Somewhat successful	Somewhat successful	2	5	5	3	5	4	5	6	4	5	5	6	5	2	3-5 years	5
644	I am employed / contracted / freelance	NULL	NULL	Life Sciences;Physical Sciences	Academia / university	Professor	Yes, I manage multiple people	Full-time permanent	NULL	NULL	Mostly human participants	41-5 hours	Had a conversation with you about your career aspirations;Discussed your performance;Noted your achievements;Conducted a formal appraisal						3	7	5	Somewhat important	Somewhat important	Extremely important	Extremely important	Somewhat successful	Somewhat successful	Extremely successful	Somewhat successful	Somewhat successful	Neutral	Somewhat successful	Neutral	2	6	6	5	7	3	6	5	7	3	3	6	6	2	21-3 years	5
645	I am employed / contracted / freelance	NULL	NULL	Life Sciences	Life sciences industry (pharmaceuticals, biotechnology, medical technology and consumer healthcare)	Postdoc / Research Associate	Yes, I manage multiple people	Full-time permanent	NULL	NULL	Mostly wet lab – based on experimental equipment and reagents	51-6 hours	Requested your feedback on their management of you	4	4	5	5	7	7	7	7	Extremely important	Extremely important	Somewhat important	Extremely important	Extremely successful	Extremely successful	Somewhat successful	Extremely successful	Somewhat successful	Extremely successful	Extremely successful	Extremely successful	4	6	6	7	3	6	6	6	7	6	7	6	6	7	1-2 years	6
646	I am a student	NULL	NULL	Life Sciences;Physical Sciences	NULL	NULL	NULL	NULL	NULL	Doctoral degree (PhD/DPhil/MD)	NULL	41-5 hours	Had a conversation with you about your career aspirations;Discussed your performance	6	4	3	6	1	4	3	3	Extremely important	Extremely important	Extremely important	Extremely important	Somewhat successful	Somewhat successful	Somewhat successful	Extemely unsuccesful	Somewhat successful	Somewhat successful	Somewhat successful	Extemely unsuccesful	1	5	3	3	6	6	8	5	6	1	4	8	5	8	NULL	5
[truncated: 3,630 more rows]
[truncated: 113 more columns]

## Sheet: Sheet1
ID	Unique identifier
Q1 (multi)	Which of the following best describes your current position within the research community?
Q2 (multi)	Why did you leave the research community?
Q3 (single)	When did you leave the research community?
Q4 (multi)	Which of the following best describes your research discipline or sector?
Q5 (single)	Which of the following best describes your current role?
Q6 (single)	Which of the following best describes your current role?
[truncated: 64 more rows]
